1 **Title: CDC20B is required for deuterosome-mediated centriole production in**  
2 **multiciliated cells**

3

4 **Authors:** Diego R. Revinski<sup>1†</sup>, Laure-Emmanuelle Zaragosi<sup>2†</sup>, Camille Boutin<sup>1†</sup>, Sandra Ruiz-  
5 Garcia<sup>2</sup>, Marie Deprez<sup>2</sup>, Virginie Thomé<sup>1</sup>, Olivier Rosnet<sup>1</sup>, Anne-Sophie Gay<sup>2</sup>, Olivier  
6 Mercey<sup>2</sup>, Agnès Paquet<sup>2</sup>, Nicolas Pons<sup>2</sup>, Gilles Ponzio<sup>2</sup>, Brice Marcet<sup>2\*</sup>, Laurent  
7 Kodjabachian<sup>1\*</sup>, Pascal Barbry<sup>2\*</sup>

8

9 **Affiliations:**

10 <sup>1</sup> Aix Marseille Univ, CNRS, IBDM, Marseille, France

11 <sup>2</sup> Université Côte d'Azur, CNRS, IPMC, Sophia-Antipolis, France.

12 <sup>†</sup> These authors contributed equally

13 \*Correspondence to: marcet@ipmc.cnrs.fr; laurent.kodjabachian@univ-amu.fr;  
14 barbry@ipmc.cnrs.fr

15

16 **Keywords:** multiciliated cell, centriole, deuterosome, motile cilia, CDC20B, Separase, PLK1,  
17 cell cycle, *Xenopus*, mouse, human

18

19

20 **Abstract:** Multiciliated cells (MCCs) harbour dozens to hundreds of motile cilia, which beat in  
21 a synchronized and directional manner, thus generating hydrodynamic forces important in  
22 animal physiology. In vertebrates, MCC differentiation critically depends on the synthesis and  
23 release of numerous centrioles by specialized structures called deuterosomes. Little is known  
24 about the composition, organization and regulation of deuterosomes. Here, single-cell RNA  
25 sequencing reveals that human deuterosome-stage MCCs are characterized by the expression  
26 of many cell cycle-related genes. We further investigated the uncharacterized vertebrate-  
27 specific *cell division cycle 20B (CDC20B)* gene, the host gene of microRNA-449abc. We show  
28 that the CDC20B protein associates to deuterosomes and is required for the release of centrioles  
29 and the subsequent production of cilia in mouse and *Xenopus* MCCs. CDC20B interacts with  
30 PLK1, which has been shown to coordinate centriole disengagement with the protease Separase  
31 in mitotic cells. Strikingly, over-expression of Separase rescued centriole disengagement and  
32 cilia production in CDC20B-deficient MCCs. This work reveals the shaping of a new biological  
33 function, deuterosome-mediated centriole production in vertebrate MCCs, by adaptation of  
34 canonical and recently evolved cell cycle-related molecules.

35  
36 Multiciliated cells (MCCs) are present throughout metazoan evolution and serve functions  
37 ranging from locomotion of marine larvae and flatworms, to brain homeostasis, mucociliary  
38 clearance of pathogens and transportation of oocytes in vertebrates<sup>1-3</sup>. The formation of MCCs  
39 requires the production of numerous motile cilia through a complex process called  
40 multiciliogenesis<sup>2,3</sup>. The transcriptional control of multiciliogenesis has been decrypted to a  
41 large extent, through studies in *Xenopus* and mouse<sup>2</sup>. Seating at the top of the cascade, the  
42 Geminin-related factors GemC1<sup>4-7</sup> and Multicilin<sup>8,9</sup> (MCIDAS in mammals) are both necessary  
43 and sufficient to initiate MCC differentiation. GemC1 and Multicilin in complex with E2F  
44 transcription factors have been reported to activate the expression of Myb, FoxJ1, Rfx2 and

45 Rfx3, which collectively regulate the expression of a large body of effectors required for the  
46 formation of multiple motile cilia<sup>4, 5, 8-11</sup>. Recently, defective multiciliogenesis caused by  
47 mutations in MCIDAS and Cyclin O (CCNO) has been associated with congenital respiratory  
48 and fertility syndromes in human<sup>12, 13</sup>.

49 Each cilium sits atop a modified centriole, called a basal body (BB). After they exit from the  
50 cell cycle, maturing MCCs face the challenge of producing dozens to hundreds of centrioles in  
51 a limited time window. In vertebrate MCCs, bulk centriole biogenesis is mostly achieved  
52 through an acentriolar structure named the deuterosome, although canonical amplification from  
53 parental centrioles also occurs<sup>1-3</sup>. The deuterosome was first described in early electron  
54 microscopy studies of various multiciliated tissues including the mammalian lung<sup>14</sup> and  
55 oviduct<sup>15, 16</sup>, the avian trachea<sup>17</sup>, and the *Xenopus* tadpole epidermis and trachea<sup>18</sup>. In  
56 mammalian MCCs, the deuterosome was described as a spherical mass of fibers organized into  
57 an inner dense region and an outer, more delicate, corona<sup>16</sup>. In *Xenopus*, deuterosomes were  
58 initially named procentriole organizers and were reported as dense amorphous masses<sup>18</sup>. Recent  
59 studies have revealed that deuterosome-mediated centriole synthesis mobilizes key components  
60 of the centriole-dependent duplication pathway of the cell cycle, including CEP152, PLK4 and  
61 SAS6<sup>19-21</sup>. However, the deuterosome itself differs from the centriole and may contain specific  
62 components. The identification of one such component, called DEUP1 for Deuterosome  
63 assembly protein 1, opened the possibility to investigate the deuterosome at the molecular  
64 level<sup>21</sup>. In mouse tracheal ependymal cells, DEUP1 was detected in the core of the  
65 deuterosome<sup>21</sup>. DEUP1, also known as CCDC67, is a conserved vertebrate paralogue of  
66 CEP63, itself known for its importance in initiation of centriole duplication during the cell  
67 cycle<sup>21,22</sup>. Consistently, DEUP1 was shown to be essential for centriole multiplication in mouse  
68 and *Xenopus* MCCs<sup>21</sup>. Both CEP63 and DEUP1 interact with CEP152, an event essential for  
69 centriole duplication and multiplication in cycling cells and MCCs, respectively<sup>21, 22</sup>. Once

70 centriole multiplication is over, neo-synthesized centrioles must disengage from deuterosomes  
71 and parental centrioles, convert into BBs and migrate apically to dock at the plasma membrane  
72 to initiate cilium elongation.

73 In this study, we aimed at better understanding deuterosome biology. We found that the gene  
74 *CDC20B* was specifically expressed in maturing MCCs during the phase of centriole  
75 multiplication. We established the corresponding CDC20B protein as an essential regulator of  
76 centriole-deuterosome disengagement. This work illustrates well the strong functional  
77 relationships that exist between centriole release from deuterosomes and centriole  
78 disengagement in mitotic cells. It also posits CDC20B as a new component of a “multiciliary  
79 locus” that contains several gene products, either proteins, such as MCIDAS, CCNO or  
80 CDC20B itself, or microRNAs, such as miR-449abc, which are all actively involved into  
81 multiciliogenesis.

82

### 83 **Results**

84 To identify new regulators of centriole multiplication, we analyzed the transcriptome of human  
85 airway epithelial cells (HAECs) at the differentiation stage corresponding to active centriole  
86 multiplication<sup>23</sup> at the single-cell level (Fig. 1a). Gene expression data from 1663 cells was  
87 projected on a 2D space by *t*-distributed Stochastic Neighbor Embedding (tSNE) (Fig. 1b). We  
88 identified a small group of 37 cells corresponding to maturing MCCs engaged in deuterosome-  
89 mediated centriole amplification, as revealed by the specific expression of *MCIDAS*<sup>8</sup>, *MYB*<sup>24</sup>,  
90 and *DEUPI*<sup>21</sup> (Fig. 1c,d and Supplementary Fig. 1). This subpopulation was characterized by  
91 the expression of known effectors of centriole synthesis, such as *PLK4*, *STIL*, *CEP152*, *SASS6*,  
92 but also of cell cycle regulators, such as *CDK1*, *CCNB1*, *CDC20*, *SGOL2* and *NEK2* (Fig. 1d,  
93 Supplementary Fig. 1 and Supplementary Table 1). We reasoned that uncharacterized cell  
94 cycle-related genes that are specific to this subpopulation could encode new components of the

95 deuterosome-dependent centriole amplification pathway. A particularly interesting candidate  
96 in this category was *CDC20B* (Fig. 1d), which is related to the cell cycle regulators *CDC20* and  
97 *FZR1*<sup>25</sup> (Supplementary Fig. 2a). First, the *CDC20B* gene is present in the vertebrate genomic  
98 locus that also contains the key MCC regulators *MCIDAS*<sup>8</sup> and *CCNO*<sup>13</sup>. Co-expression of  
99 *CDC20B*, *MCIDAS* and *CCNO* throughout HAEC differentiation was indeed observed in an  
100 independent RNA sequencing study, performed on a bulk population of HAECs  
101 (Supplementary Fig. 2b). These results fit well with the observation that the promoter of human  
102 *CDC20B* was strongly activated by the *MCIDAS* partners E2F1 and E2F4 (Supplementary Fig.  
103 2c), as also shown in *Xenopus* by others<sup>9</sup> (Supplementary Fig. 2d). Second, the *CDC20B* gene  
104 bears in its second intron the miR-449 microRNAs, which were shown to contribute to MCC  
105 differentiation<sup>23, 26-30</sup>. Finally, in *Xenopus* epidermal MCCs, *cdc20b* transcripts were  
106 specifically detected during the phase of centriole amplification (Supplementary Fig. 2e-m).  
107 This first set of data pointed out the specific and conserved expression pattern of *CDC20B* in  
108 immature MCCs. In the rest of this study, we analyzed the putative role of *CDC20B* in  
109 deuterosome-mediated centriole multiplication.

110 We first conducted a series of immunofluorescence analyses to gain a better understanding of  
111 deuterosome organization in mouse ependymal and *Xenopus* epidermal MCCs as models. In  
112 whole-mounts of mouse ependymal walls, mature deuterosomes revealed by DEUP1 staining  
113 appeared as circular structures around a lumen (Fig. 2a). We noticed that DEUP1 also stained  
114 fibers emanating from the core into the corona. Nascent centrioles revealed by the marker FOP  
115 were organized around the DEUP1-positive core ring. STED super-resolution microscopy  
116 helped to better appreciate the regular organization of individual FOP-positive procentrioles  
117 (Fig. 2b). Proximity labeling assays have revealed that when ectopically expressed in  
118 centrosomes *CCDC67/DEUP1* is found close to Pericentrin (PCNT) and  $\gamma$ -tubulin, two main  
119 components of the pericentriolar material (PCM)<sup>31</sup>. Interestingly, we found that PCNT was

120 present in the deuterosome corona (Fig. 2a), and STED microscopy further revealed that PCNT  
121 formed fibers around growing procentrioles (Fig. 2b).  $\gamma$ -tubulin staining was detected in the  
122 DEUP1-positive deuterosome core, as well as in the corona (Fig. 2a). STED microscopy  
123 indicated that PCNT and  $\gamma$ -tubulin stained distinct interwoven fibers in the deuterosome corona.  
124 Next, we stained immature *Xenopus* epidermal MCCs with  $\gamma$ -Tubulin and Centrin to reveal  
125 centriole amplification platforms. These platforms displayed irregular shapes and sizes (Fig.  
126 2c), in agreement with early electron microscopy studies<sup>18</sup>. Expression of low amounts of GFP-  
127 Deup1 in MCCs induced by Multicilin confirmed that active deuterosomes are embedded in  $\gamma$ -  
128 Tubulin-positive masses (Fig. 2d). Overall, this analysis is consistent with early ultrastructural  
129 studies, as the deuterosome core and corona can be distinguished by the presence of DEUP1  
130 and PCNT, respectively. Moreover,  $\gamma$ -tubulin is a conserved marker of centriole amplification  
131 platforms in vertebrate MCCs. By analogy to the organization of the centrosome, we propose  
132 to coin the term perideuterosomal material (PDM) to describe the corona, as this region may  
133 prove important for deuterosome function.

134 We then analyzed the subcellular localization of CDC20B protein in deuterosome-stage mouse  
135 and *Xenopus* MCCs. In immature mouse tracheal MCCs, double immunofluorescence revealed  
136 the association of CDC20B to DEUP1-positive deuterosomes (Fig. 3a). We noticed that  
137 CDC20B tended to associate primarily to large DEUP1 foci. As deuterosomes grow as they  
138 mature<sup>21</sup>, this suggests that CDC20B may penetrate into the deuterosomal environment at a late  
139 stage of the centriole multiplication process. The same observation was made when comparing  
140 CDC20B staining in the region of immature and mature deuterosomes of mouse ependymal  
141 MCCs (Fig. 3b). As double DEUP1/CDC20B staining could not be performed on these cells,  
142 we analyzed CDC20B distribution relative to FOP-positive procentrioles. In early  
143 deuterosome-stage MCCs, CDC20B was expressed at low levels and FOP staining was mostly  
144 concentrated in a large amorphous cloud (Fig. 3b). In such cells, no CDC20B staining was

145 detected in association to FOP-positive procentrioles growing around deuterosomes. In  
146 contrast, in mature deuterosome-stage MCCs, CDC20B was enriched in the innermost part of  
147 the PDM, probably very close to the deuterosome core (Fig. 3b). Further evidence was provided  
148 with a custom-made polyclonal antibody (Supplementary Fig. 3b,c) used to analyze Cdc20b  
149 protein distribution in *Xenopus* epidermal MCCs. Here also, Cdc20b was found associated to  
150 Deup1-positive deuterosomes actively engaged in centriole synthesis (Fig. 3c). We finally  
151 analyzed the distribution of CDC20B in mature MCCs. As previously reported, the CDC20B  
152 protein was detected near BBs<sup>23</sup>, but also in cilia of fully differentiated human airway MCCs  
153 (Supplementary Fig. 4a-c). This was confirmed by proximity ligation assays that revealed a  
154 tight association of CDC20B with Centrin2 and acetylated  $\alpha$ -Tubulin, in BBs and cilia,  
155 respectively (Supplementary Fig. 4d-f). Fluorescent immunostaining also revealed the presence  
156 of Cdc20b in the vicinity of BBs in *Xenopus* epidermal MCCs (Supplementary Fig. 4g-i). In  
157 contrast, no cilia staining was observed in these cells. We conclude that in three distinct types  
158 of MCCs in two distant vertebrate species, CDC20B is tightly associated to mature  
159 deuterosomes. We next investigated whether it may control their function.

160 For that purpose, *Cdc20b* was knocked down in mouse ependymal MCCs, through post-natal  
161 brain electroporation of three distinct shRNAs. One of them, sh274, which targets the junction  
162 between exons 3 and 4, and can therefore only interact with mature mRNA, was useful to rule  
163 out possible interference with the production of miR-449 molecules from the *Cdc20b* pre-  
164 mRNA (Supplementary Fig. 5a). Five days after electroporation, all three shRNAs significantly  
165 reduced the expression of CDC20B in deuterosome-stage MCCs (Fig. 4c), but did not alter  
166 MCC identity as revealed by FOXJ1 expression (Fig. 4a,b,d). Centriole production by  
167 deuterosomes was analyzed by FOP/DEUP1 double staining nine days after electroporation. At  
168 this stage, control MCCs had nearly all released their centrioles and disassembled their  
169 deuterosomes (Fig. 4e,g). In sharp contrast, *Cdc20b* shRNAs caused a significant increase in

170 the number of defective MCCs that displayed centrioles still engaged on deuterosomes (Fig.  
171 4f,g). Fifteen days after electroporation, a majority of CDC20B-deficient MCCs still showed a  
172 severely reduced number of released centrioles, and consequently lacked cilia (Fig. 4h-k).  
173 *Cdc20b* was also knocked down in *Xenopus* epidermal MCCs, through injection of two  
174 independent morpholino antisense oligonucleotides targeting either the ATG (Mo ATG), or the  
175 exon 1/intron 1 junction (Mo Spl) (Supplementary Fig. 5b). The efficiency of Mo ATG was  
176 verified through fluorescence extinction of co-injected *Cdc20b*-Venus (Supplementary Fig. 5c).  
177 RT-PCR confirmed that Mo Spl caused intron 1 retention (Supplementary Fig. 5d), which was  
178 expected to introduce a premature stop codon, and to produce a *Cdc20b* protein lacking 96%  
179 of its amino-acids, likely to undergo unfolded protein response-mediated degradation. Thus,  
180 both morpholinos were expected to generate severe loss of *Cdc20b* function. Consistent with  
181 this interpretation, both morpholinos strongly reduced *Cdc20b* immunostaining in  
182 deuterosome-stage MCCs (Supplementary Fig. 5e). We verified that neither morpholinos  
183 caused *p53* transcript up-regulation (Supplementary Fig. 5f), a non-specific response to  
184 morpholinos that is sometimes detected in zebrafish embryos<sup>32</sup>. Importantly, whole-mount *in*  
185 *situ* hybridization indicated that miR-449 expression was not perturbed in the presence of either  
186 morpholino (Supplementary Fig. 5g). We found that *cdc20b* knockdown did not interfere with  
187 acquisition of the MCC fate (Supplementary Fig. 6a-e), but severely impaired multiciliogenesis,  
188 as revealed by immunofluorescence and electron microscopy (Fig. 5a-i). This defect stemmed  
189 from a dramatic reduction in the number of centrioles, and poor docking at the plasma  
190 membrane (Fig. 5g-o and Supplementary Fig. 6f-k). Importantly, centrioles and cilia were  
191 rescued in Mo Spl MCCs by co-injection of *cdc20b*, *venus-cdc20b* or *cdc20b-venus* mRNAs  
192 (Fig. 5j-o and Supplementary Fig. 6f-k). In normal condition, *Xenopus* epidermal MCCs arise  
193 in the inner mesenchymal layer and intercalate into the outer epithelial layer, while the process  
194 of centriole amplification is underway<sup>33</sup>. To rule out secondary defects due to poor radial



195 intercalation, we assessed the consequences of *cdc20b* knockdown in MCCs induced in the  
196 outer layer by Multicilin overexpression<sup>8</sup>. Like in natural MCCs, Cdc20b proved to be essential  
197 for the production of centrioles and cilia in response to Multicilin activity (Supplementary Fig.  
198 7a-g). We also noted that the apical actin network that normally surrounds BBs was not  
199 maintained in absence of Cdc20b, although this defect could be secondary to the absence of  
200 centrioles (Supplementary Fig. 7d-g). Centrioles in Cdc20b morphant cells often formed  
201 clusters, suggesting that disengagement from deuterosomes could have failed (Fig. 5l,m). To  
202 better assess this process we injected GFP-Deup1 in Multicilin-induced MCCs and stained  
203 centrioles with Centrin. In mature control MCCs, deuterosomes were disassembled, centrioles  
204 were converted into BBs, had docked and initiated cilium growth (Fig. 5p,s). In contrast, both  
205 morpholinos caused a dramatic increase in the number of defective MCCs, which were devoid  
206 of cilia and displayed centrioles still engaged on deuterosomes (Fig. 5q-u). Altogether our  
207 functional assays in mouse and *Xenopus* indicate that CDC20B is required for centriole  
208 disengagement from deuterosomes and subsequent ciliogenesis in MCCs. We next investigated  
209 the molecular mechanism of action of CDC20B underlying its role in centriole release.  
210 In mitotic cells, centriole disengagement is necessary to license centriole duplication in the  
211 following cell cycle<sup>34</sup>. This process is known to depend on the coordinated activities of the  
212 mitotic kinase PLK1 and the protease Separase<sup>35</sup>. One proposed mechanism involves the  
213 phosphorylation of PCNT by PLK1, which induces its cleavage by Separase, thereby allowing  
214 centriole disengagement through disassembly of the PCM<sup>36, 37</sup> (Fig. 7h). Separase is known to  
215 be activated by the degradation of its inhibitor Securin, which is triggered by the Anaphase  
216 Promoting Complex (APC/C) upon binding to CDC20<sup>25</sup>. *PLK1*, *Separase (ESPL1)*, *Securin*  
217 (*PTTG1*), *CDC20* and *PCNT* were all found to be expressed in human deuterosome-stage  
218 MCCs (Fig. 1d and Supplementary Fig. 1). We have shown above that PCNT is present in the  
219 PDM and a recent study revealed the presence of CDC20 and the APC/C component APC3 in

220 mouse ependymal MCCs at the stage of centriole disengagement<sup>38</sup>. Based on this large body of  
221 information, we hypothesized that centriole-deuterosome disengagement involves the  
222 coordinated activities of PLK1 and Separase, and that CDC20B would be involved in this  
223 scenario. *CDC20B* encodes a protein of about 519 amino-acids largely distributed across the  
224 vertebrate phylum<sup>23</sup>. In its C-terminal half, CDC20B contains seven well conserved WD40  
225 repeats, predicted to form a  $\beta$ -propeller, showing 49% and 37% identity to CDC20 and FZR1  
226 repeats, respectively (Supplementary Fig. 2a). However, CDC20B lacks canonical APC/C  
227 binding domains (Supplementary Fig. 2a). Using mass spectrometry on immunoprecipitated  
228 protein complexes from transfected HEK cells, we could identify multiple APC/C components  
229 interacting with CDC20 but not with CDC20B (Supplementary Table 2). We conclude that  
230 CDC20B is probably incapable of activating APC/C. Interestingly, an unbiased interactome  
231 study reported association of CDC20B with PLK1<sup>39</sup>. Using reciprocal co-immunoprecipitation  
232 assays in HEK transfected cells, we confirmed that CDC20B and PLK1 could be found in the  
233 same complex (Fig. 6a). This suggested that CDC20B could cooperate with PLK1 to trigger  
234 centriole disengagement. Consistent with this hypothesis, we found that PLK1 was enriched in  
235 the PDM of mature deuterosomes in mouse ependymal MCCs (Fig. 6d), in agreement with a  
236 recent report<sup>38</sup>. Another interesting partner of CDC20B identified in a second unbiased  
237 interactome study<sup>40</sup> was SPAG5 (Astrin), which was reported to control timely activation of  
238 Separase during the cell cycle<sup>41,42</sup>. Using the same strategy as above, we could detect CDC20B  
239 and SPAG5 in the same complex (Fig. 6b). As SPAG5 was found associated to DEUP1 in a  
240 proximity labeling assay<sup>31</sup>, we assessed its localization in deuterosomes. Strikingly, SPAG5  
241 was detectable in mature deuterosomes of mouse ependymal MCCs, with a clear enrichment in  
242 the deuterosome core (Fig. 6d). Finally, reciprocal co-immunoprecipitations revealed that  
243 CDC20B and DEUP1 were detected in the same complex when co-expressed in HEK cells (Fig.  
244 6c). Consistent with this result, we observed that RFP-Cdc20b was recruited around spherical

245 Deup1-GFP structures positive for  $\gamma$ -Tubulin and Centrin in *Xenopus* epidermal MCCs  
246 (Supplementary Fig. 7h-m). This series of experiments suggested that CDC20B could  
247 participate in the assembly of a protein complex in mature deuterosomes, required to coordinate  
248 the activities of PLK1 and Separase for centriole disengagement. As Separase is the last effector  
249 in this scenario, we tested whether over-expressing human Separase in *Xenopus cdc20b*  
250 morphant MCCs could rescue centriole disengagement. In support to our hypothesis, over-  
251 expression of wild-type, but not protease-dead Separase, efficiently rescued centriole  
252 disengagement and cilia formation in *cdc20b* morphant MCCs (Fig. 7a-g and Supplementary  
253 Fig. 7n-s). Separase could also rescue multiciliogenesis in Multicilin-induced MCCs injected  
254 with *cdc20b* Mos (Supplementary Fig. 7t-z). We conclude that CDC20B is involved in  
255 Separase-mediated release of mature centrioles from deuterosomes in vertebrate MCCs (Fig.  
256 7h).

257

## 258 **Discussion**

259 In this study, we report for the first time the essential and conserved role of CDC20B in  
260 vertebrate multiciliogenesis. Our data suggest that the presence of CDC20B in the  
261 perideuterosomal region is necessary to allow Separase-dependent proteolysis leading to  
262 centriole disengagement. Our findings are consistent with a recent report showing that centriole  
263 disengagement in murine ependymal MCCs involves the activities of PLK1 and APC/C<sup>38</sup>. How  
264 are CDC20B and Separase activities integrated? The simple scenario of a CDC20-like function  
265 of CDC20B is very unlikely as it does not appear to bind APC/C (Supplementary Table 2).  
266 CDC20 was detected in cultured murine ependymal MCCs during the phase of centriole  
267 disengagement<sup>38</sup>, and FZR1 genetic ablation was reported to cause reduced production of  
268 centrioles and cilia in the same cells<sup>43</sup>. APC/C is therefore likely activated in maturing MCCs  
269 by its classical activators, CDC20 and/or FZR1, leading to Separase activation through

270 degradation of its inhibitor Securin. In that context, we propose that additional factors linked  
271 directly or indirectly to CDC20B may contribute to activation of Separase. It was shown that  
272 SPAG5 inhibits or activates Separase depending on its status of phosphorylation<sup>41, 42</sup>. As the  
273 phosphorylation status of SPAG5 was shown to be controlled by PLK1<sup>44</sup>, our data suggest that  
274 the CDC20B/PLK1/SPAG5 complex could control the timing of Separase activation locally in  
275 deuterosomes. It is therefore possible that multiple modes of activation of Separase may act in  
276 parallel to trigger the release of neo-synthesized centrioles in maturing MCCs. Alternatively,  
277 different pathways may be used in distinct species, or in distinct types of MCCs. An important  
278 question for future studies regards the identity of PLK1 and Separase substrates involved in  
279 centriole disengagement. Work on mitotic cells<sup>36, 37</sup> and our own analysis suggest that PCNT  
280 may represent a prime target. Another potentially relevant candidate could be DEUP1 itself as  
281 it is clear that deuterosomes are disassembled after the release of centrioles. In that respect, it  
282 is interesting to note the presence of multiple PLK1 consensus phosphorylation sites in human,  
283 mouse and *Xenopus* DEUP1.

284 In this study, we have introduced the notion of perideuterosomal material, in analogy to the  
285 pericentriolar material. It is striking that the two main components of the PCM, PCNT and  $\gamma$ -  
286 Tubulin, are also present in the PDM, which begs the question whether additional PCM proteins  
287 may be present in the PDM. The PDM may constitute a platform to sustain procentriole growth,  
288 through the concentration and delivery of elementary parts. It could also play a mechanical role  
289 to hold in place the growing procentrioles. Future work should evaluate deuterosome-mediated  
290 centriole synthesis in absence of major PDM components.

291 We found that beyond its association to deuterosomes during the phase of centriole  
292 amplification, CDC20B was also associated to BBs and cilia in fully differentiated mammalian  
293 MCCs. This dual localization is consistent with failed ciliogenesis upon CDC20B knockdown  
294 in mouse ependymal MCCs. However, while we could detect Cdc20b near BBs of mature

295 MCCs in *Xenopus*, we found no evidence of its presence in cilia. Furthermore, cilia were  
296 rescued by Separase overexpression in Cdc20b morphant MCCs. This suggests that Cdc20b is  
297 not required for ciliogenesis in this species, although it could potentially contribute to cilium  
298 structure and/or function. Thus, refined temporal and spatial control of CDC20B inhibition will  
299 be needed to study its function beyond centriole synthesis.

300 This and previous studies<sup>23, 26-28</sup> establish that the miR-449 cluster and its host gene *CDC20B*  
301 are commonly involved in multiciliogenesis. Consistent with its early expression, it was  
302 suggested that miR-449 controls cell cycle exit and entry into differentiation of MCCs<sup>23, 27, 30</sup>.  
303 This study reveals that CDC20B itself is involved in the production of centrioles, the first key  
304 step of the multiciliogenesis process. From that perspective, the nested organization of miR-  
305 449 and *CDC20B* in vertebrate genomes, which allows their coordinated expression, appears  
306 crucial for successful multiciliogenesis.

307 It is also noteworthy to point out the location of this gene in a genomic locus where congenital  
308 mutations in MCIDAS and CCNO were recently shown to cause a newly-recognized MCC-  
309 specific disease, called Reduced Generation of Multiple motile Cilia (RGMC). RGMC is  
310 characterized by severe chronic lung infections and increased risk of infertility<sup>12, 13</sup>. Its location  
311 in the same genetic locus as MCIDAS and CCNO makes CDC20B a putative candidate for  
312 RGMC. By extension, new deuterosome-stage specific genes uncovered by scRNA-seq in this  
313 study also represent potential candidates for additional RGMC mutations.

314 Previous works have established the involvement of the centriole duplication machinery active  
315 in S-phase of the cell cycle, during centriole multiplication of vertebrate post-mitotic MCCs<sup>19-</sup>  
316 <sup>21</sup>. Our study further reveals a striking analogy between centriole disengagement from  
317 deuterosomes in MCCs, and centriole disengagement that occurs during the M/G1 transition of  
318 the cell cycle (Fig. 7g). Thus, it appears that centriole production in MCCs recapitulates the key  
319 steps of the centriole duplication cycle<sup>34</sup>. However, the cell cycle machinery must adapt to the

320 acentriolar deuterosome to massively produce centrioles. Such adaptation appears to involve  
321 physical and functional interactions between canonical cell cycle molecules, such as CEP152  
322 and PLK1, and recently evolved cell cycle-related deuterosomal molecules, such as DEUP1<sup>21</sup>  
323 and CDC20B. It remains to examine whether additional deuterosomal cell cycle-related  
324 molecules have emerged in the vertebrate phylum to sustain massive centriole production.  
325 In conclusion, this work illustrates how coordination between ancestral and recently evolved  
326 cell cycle-related molecules can give rise to a new differentiation mechanism in vertebrates.

327

## 328 **References**

- 329 1. Meunier, A. & Azimzadeh, J. Multiciliated Cells in Animals. *Cold Spring Harb*  
330 *Perspect Biol* **8** (2016).
- 331 2. Spassky, N. & Meunier, A. The development and functions of multiciliated epithelia.  
332 *Nat Rev Mol Cell Biol* **18**, 423-436 (2017).
- 333 3. Brooks, E.R. & Wallingford, J.B. Multiciliated cells. *Curr Biol* **24**, R973-982 (2014).
- 334 4. Kyrousi, C. *et al.* Mcidas and GemC1 are key regulators for the generation of  
335 multiciliated ependymal cells in the adult neurogenic niche. *Development* **142**, 3661-3674  
336 (2015).
- 337 5. Arbi, M. *et al.* GemC1 controls multiciliogenesis in the airway epithelium. *EMBO Rep*  
338 **17**, 400-413 (2016).
- 339 6. Terre, B. *et al.* GEMC1 is a critical regulator of multiciliated cell differentiation. *EMBO*  
340 *J* **35**, 942-960 (2016).
- 341 7. Zhou, F. *et al.* Gmnc Is a Master Regulator of the Multiciliated Cell Differentiation  
342 Program. *Curr Biol* **25**, 3267-3273 (2015).
- 343 8. Stubbs, J.L., Vladar, E.K., Axelrod, J.D. & Kintner, C. Multicilin promotes centriole  
344 assembly and ciliogenesis during multiciliate cell differentiation. *Nat Cell Biol* **14**, 140-147  
345 (2012).
- 346 9. Ma, L., Quigley, I., Omran, H. & Kintner, C. Multicilin drives centriole biogenesis via  
347 E2f proteins. *Genes Dev* **28**, 1461-1471 (2014).
- 348 10. Quigley, I.K. & Kintner, C. Rfx2 Stabilizes Foxj1 Binding at Chromatin Loops to  
349 Enable Multiciliated Cell Gene Expression. *PLoS Genet* **13**, e1006538 (2017).
- 350 11. Chung, M.I. *et al.* RFX2 is broadly required for ciliogenesis during vertebrate  
351 development. *Dev Biol* **363**, 155-165 (2012).
- 352 12. Boon, M. *et al.* MCIDAS mutations result in a mucociliary clearance disorder with  
353 reduced generation of multiple motile cilia. *Nat Commun* **5**, 4418 (2014).
- 354 13. Wallmeier, J. *et al.* Mutations in CCNO result in congenital mucociliary clearance  
355 disorder with reduced generation of multiple motile cilia. *Nat Genet* **46**, 646-651 (2014).
- 356 14. Sorokin, S.P. Reconstructions of centriole formation and ciliogenesis in mammalian  
357 lungs. *J Cell Sci* **3**, 207-230 (1968).
- 358 15. Dirksen, E.R. Centriole morphogenesis in developing ciliated epithelium of the mouse  
359 oviduct. *J Cell Biol* **51**, 286-302 (1971).
- 360 16. Anderson, R.G. & Brenner, R.M. The formation of basal bodies (centrioles) in the  
361 Rhesus monkey oviduct. *J Cell Biol* **50**, 10-34 (1971).

- 362 17. Kalnins, V.I. & Porter, K.R. Centriole replication during ciliogenesis in the chick  
363 tracheal epithelium. *Z Zellforsch Mikrosk Anat* **100**, 1-30 (1969).
- 364 18. Steinman, R.M. An electron microscopic study of ciliogenesis in developing epidermis  
365 and trachea in the embryo of *Xenopus laevis*. *Am J Anat* **122**, 19-55 (1968).
- 366 19. Al Jord, A. *et al.* Centriole amplification by mother and daughter centrioles differs in  
367 multiciliated cells. *Nature* **516**, 104-107 (2014).
- 368 20. Klos Dehring, D.A. *et al.* Deuterosome-mediated centriole biogenesis. *Dev Cell* **27**,  
369 103-112 (2013).
- 370 21. Zhao, H. *et al.* The Cep63 paralogue *Deup1* enables massive de novo centriole  
371 biogenesis for vertebrate multiciliogenesis. *Nat Cell Biol* **15**, 1434-1444 (2013).
- 372 22. Sir, J.H. *et al.* A primary microcephaly protein complex forms a ring around parental  
373 centrioles. *Nat Genet* **43**, 1147-1153 (2011).
- 374 23. Marcet, B. *et al.* Control of vertebrate multiciliogenesis by miR-449 through direct  
375 repression of the Delta/Notch pathway. *Nat Cell Biol* **13**, 693-699 (2011).
- 376 24. Tan, F.E. *et al.* Myb promotes centriole amplification and later steps of the  
377 multiciliogenesis program. *Development* **140**, 4277-4286 (2013).
- 378 25. Yu, H. Cdc20: a WD40 activator for a cell cycle degradation machine. *Mol Cell* **27**, 3-  
379 16 (2007).
- 380 26. Song, R. *et al.* miR-34/449 miRNAs are required for motile ciliogenesis by repressing  
381 cp110. *Nature* **510**, 115-120 (2014).
- 382 27. Otto, T. *et al.* Cell cycle-targeting microRNAs promote differentiation by enforcing  
383 cell-cycle exit. *Proc Natl Acad Sci U S A* **114**, 10660-10665 (2017).
- 384 28. Wu, J. *et al.* Two miRNA clusters, miR-34b/c and miR-449, are essential for normal  
385 brain development, motile ciliogenesis, and spermatogenesis. *Proc Natl Acad Sci U S A* **111**,  
386 E2851-2857 (2014).
- 387 29. Chevalier, B. *et al.* miR-34/449 control apical actin network formation during  
388 multiciliogenesis through small GTPase pathways. *Nat Commun* **6**, 8386 (2015).
- 389 30. Mercey, O. *et al.* Characterizing isomiR variants within the microRNA-34/449 family.  
390 *FEBS Lett* **591**, 693-705 (2017).
- 391 31. Firat-Karalar, E.N., Rauniyar, N., Yates, J.R., 3rd & Stearns, T. Proximity interactions  
392 among centrosome components identify regulators of centriole duplication. *Curr Biol* **24**, 664-  
393 670 (2014).
- 394 32. Robu, M.E. *et al.* p53 activation by knockdown technologies. *PLoS Genet* **3**, e78 (2007).
- 395 33. Werner, M.E. *et al.* Radial intercalation is regulated by the Par complex and the  
396 microtubule-stabilizing protein CLAMP/Spel1. *J Cell Biol* **206**, 367-376 (2014).
- 397 34. Firat-Karalar, E.N. & Stearns, T. The centriole duplication cycle. *Philos Trans R Soc*  
398 *Lond B Biol Sci* **369** (2014).
- 399 35. Tsou, M.F. *et al.* Polo kinase and separase regulate the mitotic licensing of centriole  
400 duplication in human cells. *Dev Cell* **17**, 344-354 (2009).
- 401 36. Kim, J., Lee, K. & Rhee, K. PLK1 regulation of PCNT cleavage ensures fidelity of  
402 centriole separation during mitotic exit. *Nat Commun* **6**, 10076 (2015).
- 403 37. Matsuo, K. *et al.* Kendrin is a novel substrate for separase involved in the licensing of  
404 centriole duplication. *Curr Biol* **22**, 915-921 (2012).
- 405 38. Al Jord, A. *et al.* Calibrated mitotic oscillator drives motile ciliogenesis. *Science* **358**,  
406 803-806 (2017).
- 407 39. Huttlin, E.L. *et al.* The BioPlex Network: A Systematic Exploration of the Human  
408 Interactome. *Cell* **162**, 425-440 (2015).
- 409 40. Rual, J.F. *et al.* Towards a proteome-scale map of the human protein-protein interaction  
410 network. *Nature* **437**, 1173-1178 (2005).

- 411 41. Thein, K.H., Kleylein-Sohn, J., Nigg, E.A. & Gruneberg, U. Astrin is required for the  
412 maintenance of sister chromatid cohesion and centrosome integrity. *J Cell Biol* **178**, 345-354  
413 (2007).
- 414 42. Chiu, S.C. *et al.* The mitosis-regulating and protein-protein interaction activities of  
415 astrin are controlled by aurora-A-induced phosphorylation. *Am J Physiol Cell Physiol* **307**,  
416 C466-478 (2014).
- 417 43. Eguren, M. *et al.* The APC/C cofactor Cdh1 prevents replicative stress and p53-  
418 dependent cell death in neural progenitors. *Nat Commun* **4**, 2880 (2013).
- 419 44. Chung, H.J., Park, J.E., Lee, N.S., Kim, H. & Jang, C.Y. Phosphorylation of Astrin  
420 Regulates Its Kinetochore Function. *J Biol Chem* **291**, 17579-17592 (2016).
- 421 45. Qiu, X. *et al.* Single-cell mRNA quantification and differential analysis with Census.  
422 *Nat Methods* **14**, 309-315 (2017).
- 423 46. Macosko, E.Z. *et al.* Highly Parallel Genome-wide Expression Profiling of Individual  
424 Cells Using Nanoliter Droplets. *Cell* **161**, 1202-1214 (2015).
- 425 47. Kim, D. *et al.* TopHat2: accurate alignment of transcriptomes in the presence of  
426 insertions, deletions and gene fusions. *Genome Biol* **14**, R36 (2013).
- 427 48. Anders, S., Pyl, P.T. & Huber, W. HTSeq--a Python framework to work with high-  
428 throughput sequencing data. *Bioinformatics* **31**, 166-169 (2015).
- 429 49. Love, M.I., Huber, W. & Anders, S. Moderated estimation of fold change and dispersion  
430 for RNA-seq data with DESeq2. *Genome Biol* **15**, 550 (2014).
- 431 50. Langmead, B. & Salzberg, S.L. Fast gapped-read alignment with Bowtie 2. *Nat Methods*  
432 **9**, 357-359 (2012).
- 433 51. Heinz, S. *et al.* Simple combinations of lineage-determining transcription factors prime  
434 cis-regulatory elements required for macrophage and B cell identities. *Mol Cell* **38**, 576-589  
435 (2010).
- 436 52. Boutin, C. *et al.* A dual role for planar cell polarity genes in ciliated cells. *Proc Natl*  
437 *Acad Sci U S A* **111**, E3129-3138 (2014).
- 438 53. Boutin, C. *et al.* NeuroD1 induces terminal neuronal differentiation in olfactory  
439 neurogenesis. *Proc Natl Acad Sci U S A* **107**, 1201-1206 (2010).
- 440 54. Boutin, C., Diestel, S., Desoeuvre, A., Tiveron, M.C. & Cremer, H. Efficient *in vivo*  
441 electroporation of the postnatal rodent forebrain. *PLoS One* **3**, e1883 (2008).
- 442 55. You, Y. & Brody, S.L. Culture and differentiation of mouse tracheal epithelial cells.  
443 *Methods Mol Biol* **945**, 123-143 (2013).
- 444 56. Marchal, L., Luxardi, G., Thome, V. & Kodjabachian, L. BMP inhibition initiates neural  
445 induction via FGF signaling and *Zic* genes. *Proc Natl Acad Sci U S A* **106**, 17437-17442 (2009).
- 446 57. Castillo-Briceno, P. & Kodjabachian, L. *Xenopus* embryonic epidermis as a mucociliary  
447 cellular ecosystem to assess the effect of sex hormones in a non-reproductive context. *Front*  
448 *Zool* **11**, 9 (2014).
- 449 58. Deblandre, G.A., Wettstein, D.A., Koyano-Nakagawa, N. & Kintner, C. A two-step  
450 mechanism generates the spacing pattern of the ciliated cells in the skin of *Xenopus* embryos.  
451 *Development* **126**, 4715-4728 (1999).

452  
453

#### 454 **Acknowledgements**

455 We are grateful to Chris Kintner, Marc Kirschner, Olaf Stemmann, Reinhard Köster, Xavier  
456 Morin and Xueliang Zhu for reagents. Imaging in IBDM was performed on PiCSL-FBI core



457 facility, supported by the French National Research Agency through the program "Investments  
458 for the Future" (France-BioImaging, ANR-10-INBS-04). Sequencing at UCAGenomiX  
459 (IPMC), a partner of the National Infrastructure France Génomique, was supported by  
460 Commissariat aux Grands Investissements (ANR-10-INBS-09-03, ANR-10-INBS-09-02) and  
461 Canceropôle PACA. The authors thank Florian Roguet for *Xenopus* care, and Nathalie Garin  
462 from Leica Microsystems GmbH for technical advice on STED microscopy. We are grateful to  
463 Rainer Waldmann, Kévin Lebrigand, Virginie Magnone and Nicolas Nottet for fruitful  
464 discussions on single cell RNA sequencing, and Delphine Debayle for help with mass  
465 spectrometry experiments. We thank Julien Royet and Harold Cremer for insightful comments  
466 on the manuscript. This project was funded by grants from ANR (ANR-11-BSV2-021-02,  
467 ANR-13-BSV4-0013, ANR-15-CE13-0003), FRM (DEQ20141231765, DEQ20130326464),  
468 Fondation ARC (PJA 20161204865, PJA 20161204542), the labex Signallife (ANR-11-LABX-  
469 0028-01), the association Vaincre la Mucoviscidose (RF20140501158, RF20120600738,  
470 RF20150501288), and the Chan Zuckerberg Initiative (Silicon Valley Foundation, 2017-175159  
471 -5022). OM, CB and DRR were supported by fellowships from Ligue Nationale contre le Cancer  
472 (OM and CB), and Fondation ARC (DRR).

473

#### 474 **Author contributions**

475 PB, BM and LK designed and supervised the study, and obtained funding. LEZ, SRG, OM  
476 performed and analyzed human and mouse airway cells experiments. DRR and VT performed  
477 and analyzed *Xenopus* experiments. CB performed and analyzed all experiments on mouse  
478 ependymal MCCs and contributed to the description of *Xenopus* deuterosomes. OR  
479 characterized CDC20B antibodies. MD and AP performed the bioinformatic analysis. NP  
480 carried out scRNAseq experiments. ASG performed mass spectrometry analyses. GP designed  
481 and performed CDC20B interaction studies. All authors were involved in data interpretation.

482 DRR, LEZ and CB designed the figures. LK drafted the original manuscript. DRR, LEZ, CB,  
483 BM, PB and LK edited the manuscript.

484

485 **Competing financial interests**

486 The authors declare no competing financial interests.

487

488 **Figures and legends**

489

490

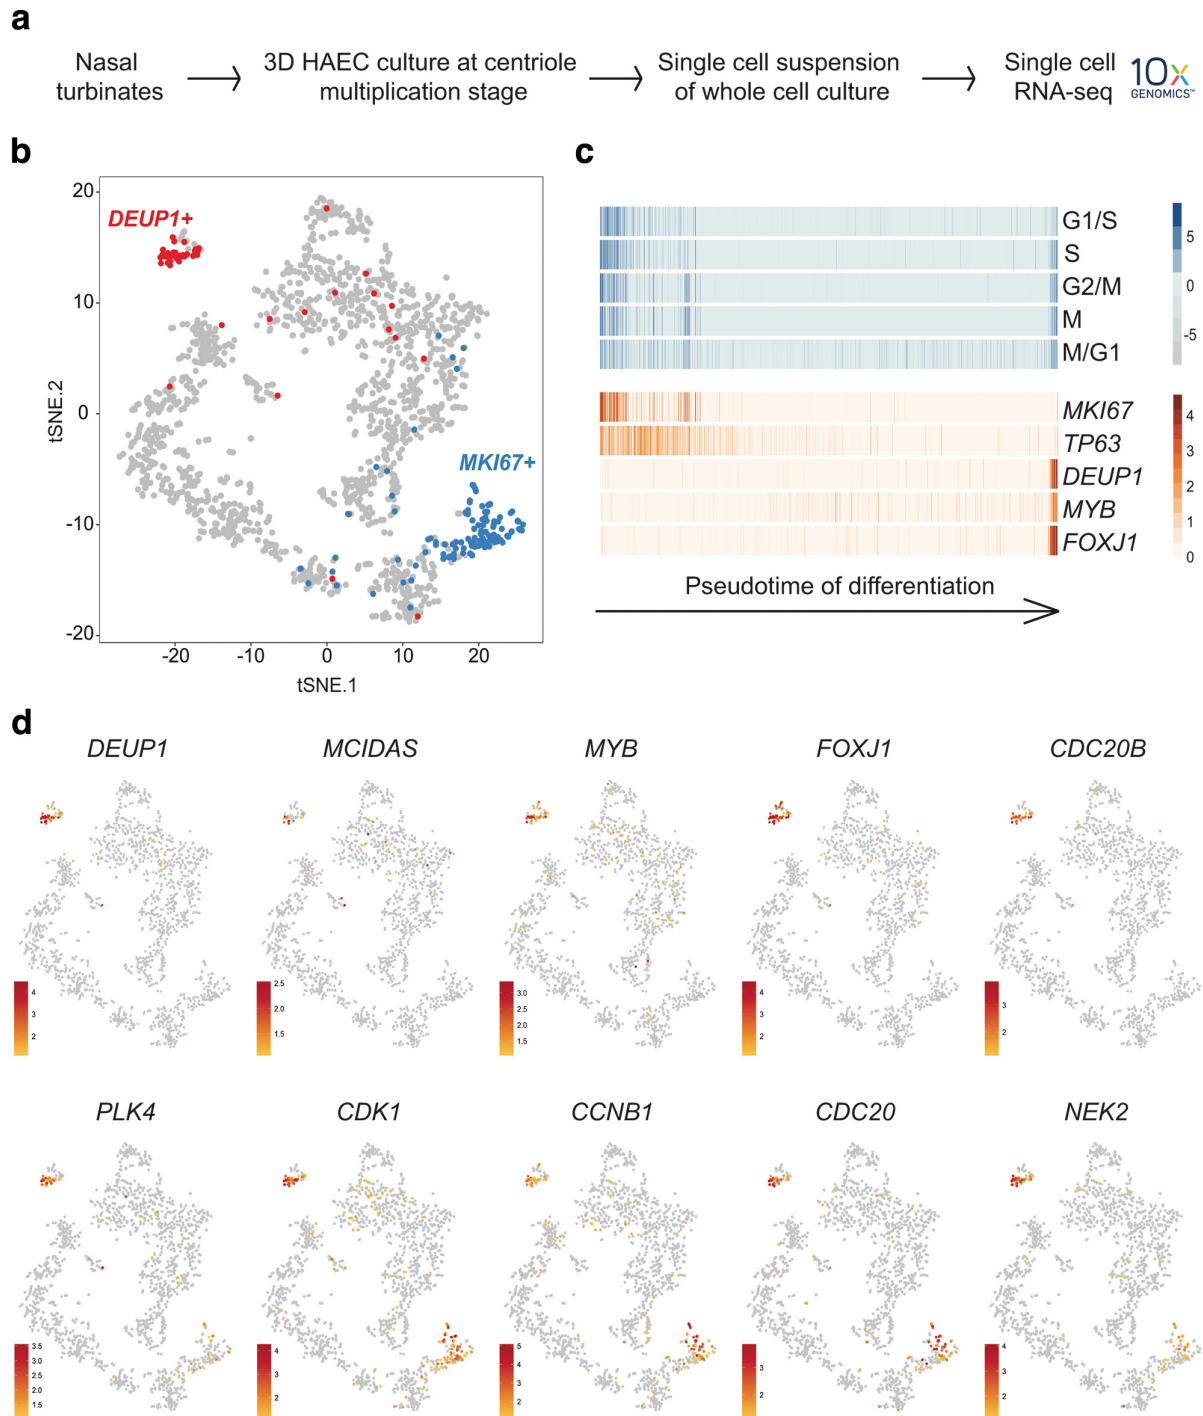

491

492 **Figure 1: Single-cell RNA-seq analysis reveals *CDC20B* as a novel specific marker of**  
 493 **deuterosomal stage MCCs, and enrichment of cell cycle-related genes in this cell**  
 494 **population.**

495 **(a)** Experimental design of the scRNA-seq experiment. **(b)** tSNE plot. Each point is a projection  
 496 of a unique cell on a 2D space generated by the tSNE algorithm. Blue dots represent *MKI67*-

497 positive proliferating cells, and red dots represent *DEUPI*-positive cells corresponding to  
498 maturing MCCs at deuterosome stage. (c) Cell cycle-related gene set expression in HAECs  
499 measured by scRNA-seq. Cells were ordered along a pseudotime axis, defined with the  
500 Monocle2 package. Phase specific scores are displayed in the top heatmap. Expression of  
501 selected genes is displayed in the bottom heatmap. (d) tSNEs plots for a selection of genes  
502 specifically enriched in deuterosome-stage cells. Note that *CDC20B* exhibits the most specific  
503 expression among deuterosome marker genes.  
504

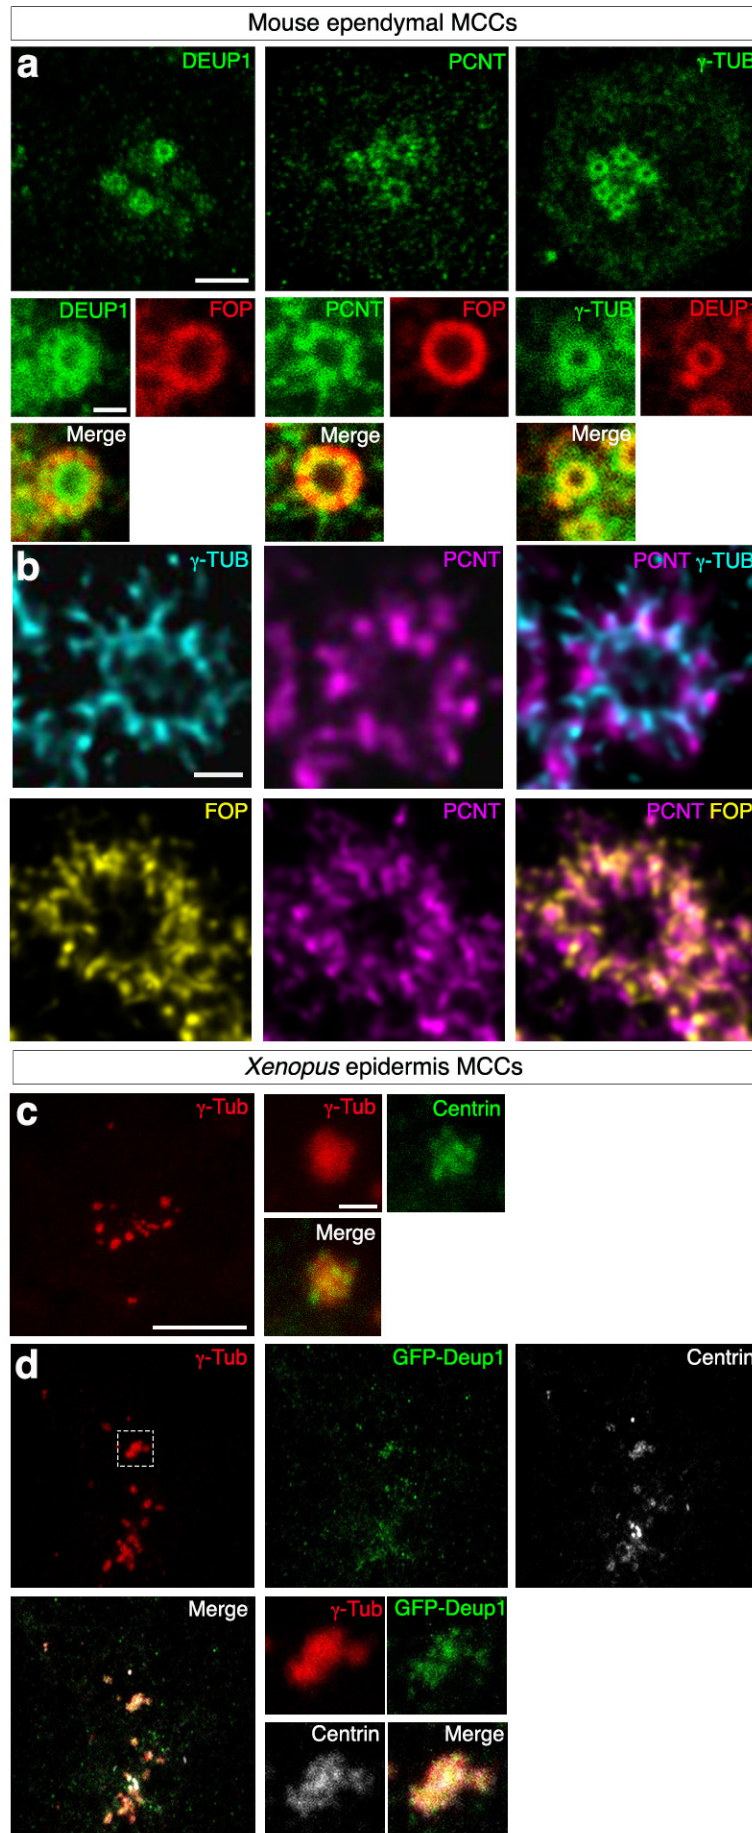

506 **Figure 2: Composition and organization of vertebrate deuterosomes**

507 **(a-b)** Maturing mouse ependymal MCCs were immunostained as indicated, pictures were taken  
508 with confocal **(a)** or STED **(b)** microscope. **(a)** DEUP1 stains the deuterosome core (ring) and  
509 a close fibrous area that defines the perideuterosomal region. The centriolar marker FOP reveals  
510 procentrioles arranged in a circle around the deuterosome. Pericentrin (PCNT) is enriched in  
511 the perideuterosomal region.  $\gamma$ -Tubulin ( $\gamma$ -TUB) stains the core as well as the periphery of the  
512 deuterosome. **(b)** STED pictures showing the organization of FOP, PCNT and  $\gamma$ -TUB in the  
513 perideuterosomal region. **(c)** *Xenopus* embryos were immunostained for  $\gamma$ -Tubulin ( $\gamma$ -Tub) and  
514 Centrin and high-magnification pictures of immature epidermal MCCs were taken. In these  
515 cells, Centrin-positive procentrioles grow around  $\gamma$ -Tubulin positive structures. **(d)** *Xenopus*  
516 embryos were injected with *Multicilin-hGR* and *GFP-Deup1* mRNAs, treated with  
517 dexamethasone at gastrula st11 to induce Multicilin activity, and immunostained at neurula st18  
518 for  $\gamma$ -Tubulin, GFP and Centrin. Scale bars: 5 $\mu$ m (**a**, top), 500nm (**a**, bottom), 500nm (**b**), 10 $\mu$ m  
519 (**c**, **d**, large view), 1 $\mu$ m (**c**, **d**, high magnification).

520

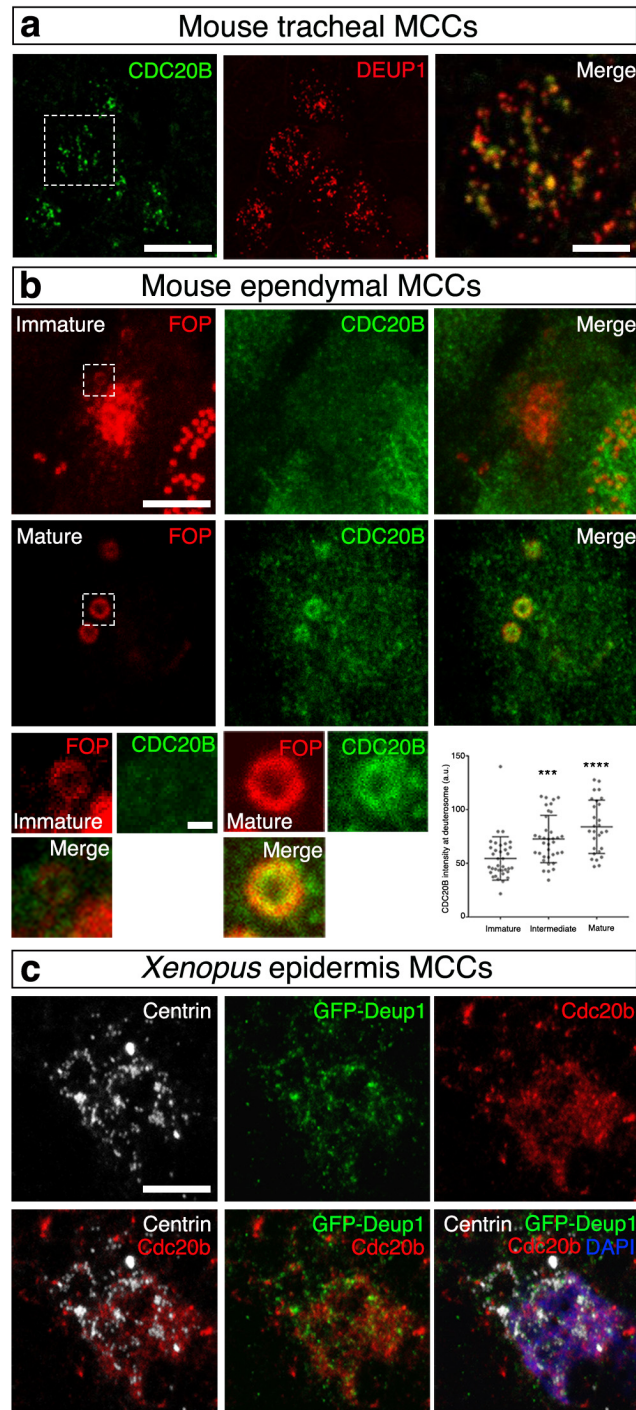

521

522 **Figure 3: CDC20B is a component of vertebrate deuterosomes**

523 (a) Double immunofluorescence was performed on mouse tracheal MCCs after 3 days of  
524 culture in air-liquid interface. Low magnification confocal panels show coincident CDC20B  
525 and DEUP1 staining in several individual MCCs. High magnification on a single MCC reveals  
526 the prominent association of CDC20B to deuterosomes marked by DEUP1. (b) Mouse

527 ependymal MCCs were immunostained as indicated, and high magnification confocal pictures  
528 of cells with immature and mature deuterosomal figures were taken. In these cells, centrioles  
529 revealed by FOP form a ring around deuterosomes. CDC20B staining forms a ring inside the  
530 ring of FOP-positive procentrioles indicating that CDC20B is tightly associated to  
531 deuterosomes. Note that the CDC20B signal associated to deuterosome increased with their  
532 maturation (high-magnification pictures quantified in the graph). (c) *Xenopus* embryos were  
533 injected with *GFP-Deup1* mRNA and immunostained at neurula st18 as indicated. Scale bars:  
534 5 $\mu$ m (a, b, large view), 1.5 $\mu$ m (a, high magnification), 500nm (b, high magnification), 10 $\mu$ m  
535 (c).  
536



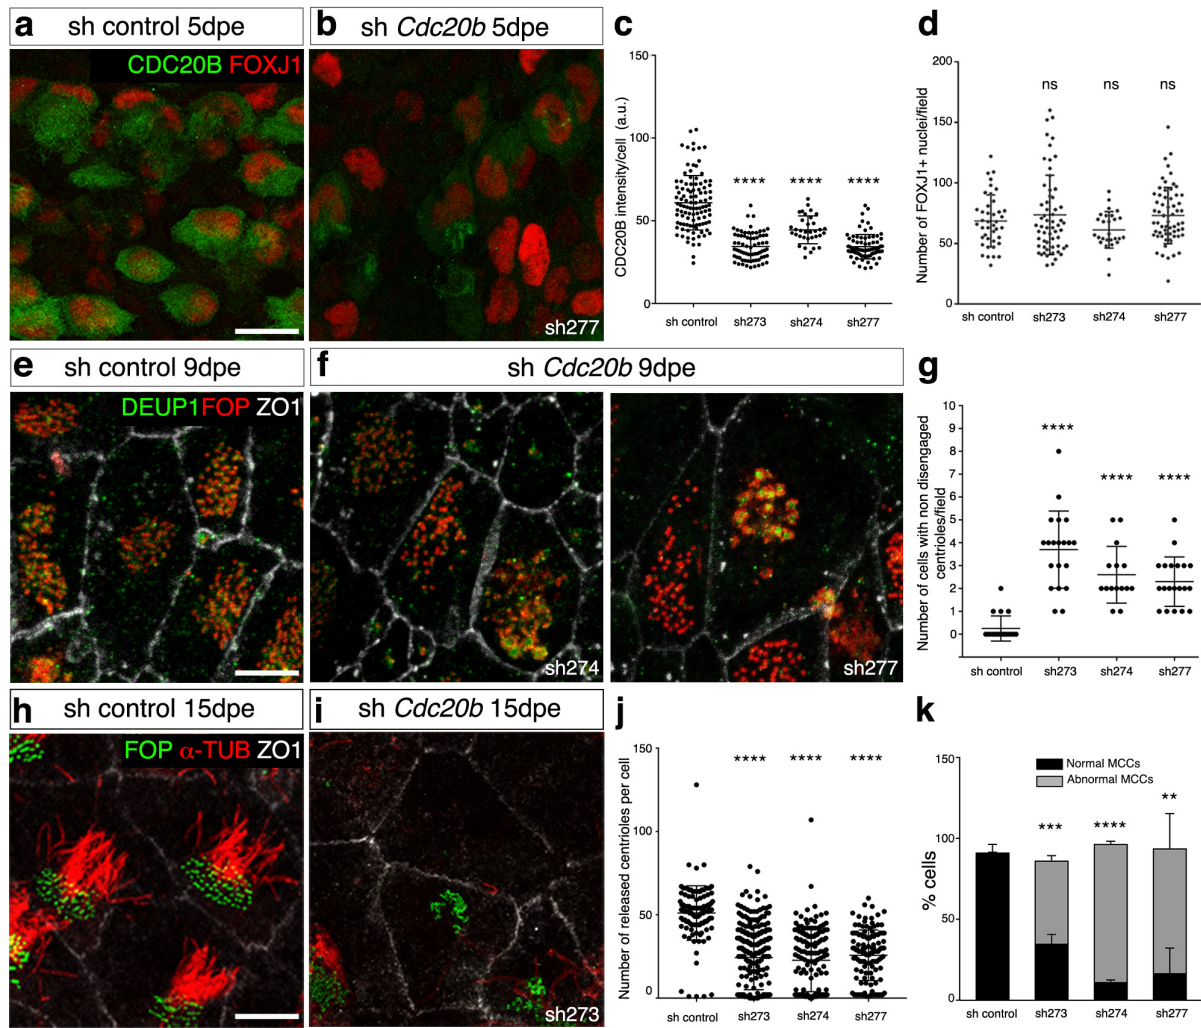

537

538 **Figure 4: CDC20B knockdown impairs centriole disengagement from deuterosomes and**  
 539 **ciliogenesis in mouse ependymal MCCs.**

540 (a,b) Ependyma were stained for CDC20B (green) and FOXJ1 (nuclear MCC fate marker, red)  
 541 5 days post electroporation (5dpe) of control shRNA (a) or *Cdc20b* shRNA (b). sh277 is  
 542 exemplified here, but all three *Cdc20b* shRNAs produced similar effects. (c) Graph showing  
 543 the quantification of CDC20B protein levels in cells at the deuterosomal stage at 5dpe.  
 544 Horizontal lines are mean values and vertical lines are standard deviations. (d) Histogram  
 545 showing the number of FOXJ1-positive nuclei observed for each field (dot), with mean values  
 546 (horizontal lines) and standard deviations (vertical lines). No significant variations were  
 547 observed between conditions, indicating that MCC fate acquisition was not affected by *Cdc20b*  
 548 knockdown. (e-f) Confocal pictures of 9dpe ependyma electroporated with control shRNA (e)

549 or *Cdc20b* shRNAs (**f**) and stained for DEUP1 (deuterosome, green), FOP (centrioles, red) and  
550 ZO1 (cell junction, white). DEUP1 positive deuterosomes with non-disengaged FOP positive  
551 centrioles were observed much more frequently in MCCs electroporated with *Cdc20b* shRNAs  
552 compared to control shRNA. (**g**) Histogram showing the number of cells with non-disengaged  
553 centrioles per field (dots), with mean values (horizontal bars) and standard deviations (vertical  
554 lines). (**h-i**) Confocal pictures of 15dpe ependyma stained for FOP (centrioles, green),  $\alpha$ -  
555 Tubulin ( $\alpha$ -TUB, cilia, red) and ZO1 (cell junction, white) showing the morphology of normal  
556 MCCs in shRNA control condition (**h**), and examples of defects observed in MCCs treated with  
557 sh *Cdc20b* (**i**). (**j**) Histogram showing the number of released centrioles per cell (dots), with  
558 mean values (horizontal bars) and standard deviations (vertical lines). (**k**) Bar graph showing  
559 the percentage of normal and abnormal MCCs. MCCs were scored abnormal when they did not  
560 display organized centriole patches associated to cilia. Scale bars: 20 $\mu$ m (**a**), 5 $\mu$ m (**e**, **i**).

561

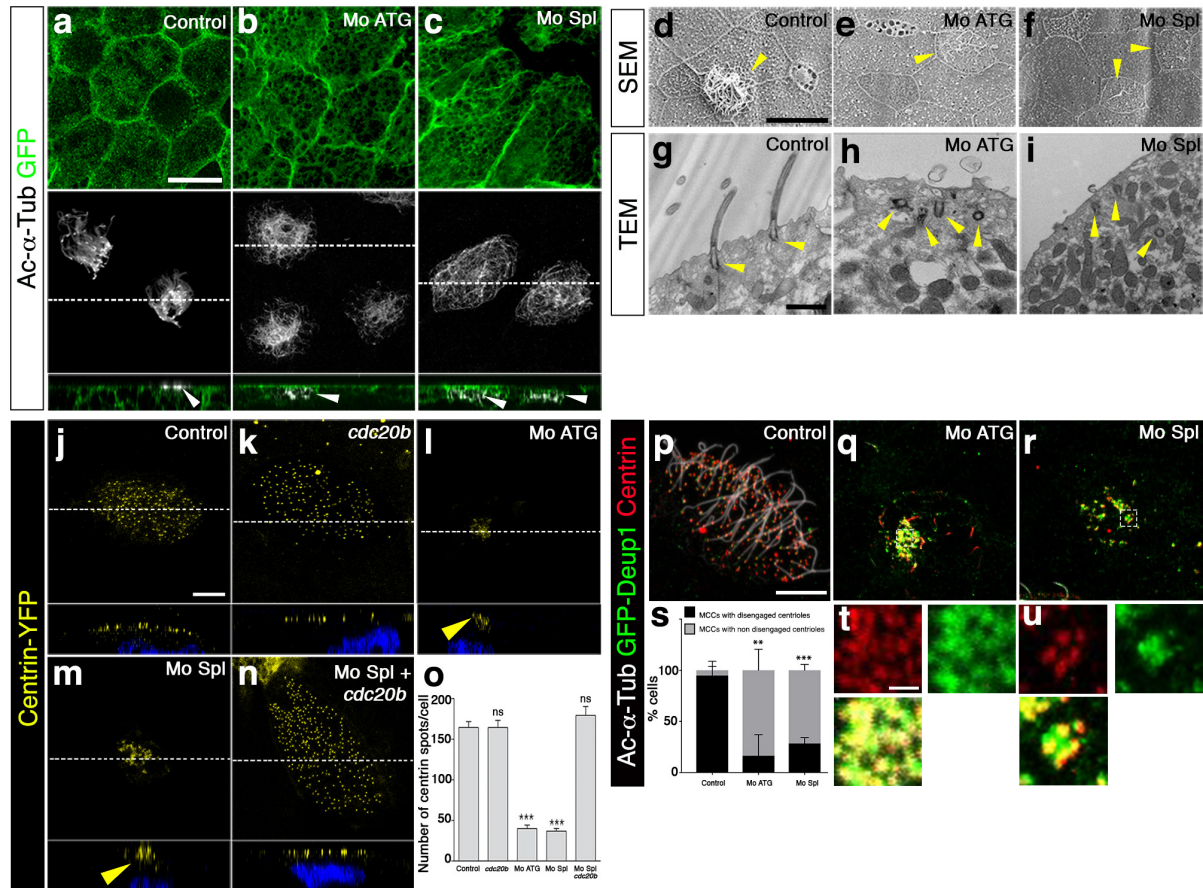

562

563 **Figure 5: *cdc20b* knockdown impairs centriole disengagement, docking and ciliogenesis**  
 564 **in *Xenopus* epidermal MCCs.**

565 **(a-c)** 8-cell embryos were injected in presumptive epidermis with *GFP-CAAX* mRNA and  
 566 *cdc20b* morpholinos, as indicated. Embryos at tailbud st25 were processed for fluorescent  
 567 staining against GFP (injection tracer, green) and Acetylated- $\alpha$ -Tubulin (Ac- $\alpha$ -Tub, cilia,  
 568 white). White dotted lines indicate the position of orthogonal projections shown in bottom  
 569 panels. Note that *cdc20b* morphant MCCs display cytoplasmic filaments but do not grow cilia  
 570 (white arrowheads). **(d-f)** Scanning Electron Microscopy (SEM) of control **(d)** and *cdc20b*  
 571 morphant **(e,f)** embryos at tadpole st31. Yellow arrowheads point at normal **(d)** and defective  
 572 MCCs **(e,f)**. **(g-i)** Transmission Electron Microscopy (TEM) of control **(g)** and *cdc20b*  
 573 morphant **(h,i)** embryos at tailbud st25. Yellow arrowheads point at normally docked basal  
 574 bodies supporting cilia **(g)** and undocked centrioles unable to support cilia **(h,i)**. **(j-n)** 8-cell

575 embryos were injected in presumptive epidermis with *centrin-YFP* mRNA, *cdc20b*  
576 morpholinos, and *cdc20b* mRNA, as indicated. Centrin-YFP fluorescence was observed  
577 directly to reveal centrioles (yellow). Nuclei were revealed by DAPI staining in blue. White  
578 dotted lines indicate the position of orthogonal projections shown in bottom panels. Yellow  
579 arrowheads point at undocked centrioles. **(o)** Bar graph showing the number of BBs per MCC,  
580 as counted by Centrin-YFP dots. *cdc20b* knockdown significantly reduced the number of BBs  
581 per cell, and this defect could be corrected by *cdc20b* co-injection with Mo Spl. **(p-u)** Embryos  
582 were injected with *Multicilin-hGR* and *GFP-Deup1* mRNAs, treated with dexamethasone at  
583 gastrula st11 to induce Multicilin activity, and immunostained at neurula st23 against  
584 Acetylated- $\alpha$ -tubulin (cilia, white), GFP (deuterosomes, green) and Centrin (centrioles, red).  
585 **(p)** Control cells showed individual centrioles, many of which had initiated ciliogenesis. Note  
586 that Deup1-positive deuterosomes were no longer visible at this stage. **(q,r,t,u)** *cdc20b*  
587 morphant MCCs showed procentrioles still engaged on deuterosomes and lacked cilia. **(s)** bar  
588 graph showing the percentage of cells that completed or not centriole disengagement. Scale  
589 bars: 20 $\mu$ m **(a, d)**, 1 $\mu$ m **(g, t)**, 5 $\mu$ m **(j, p)**.  
590

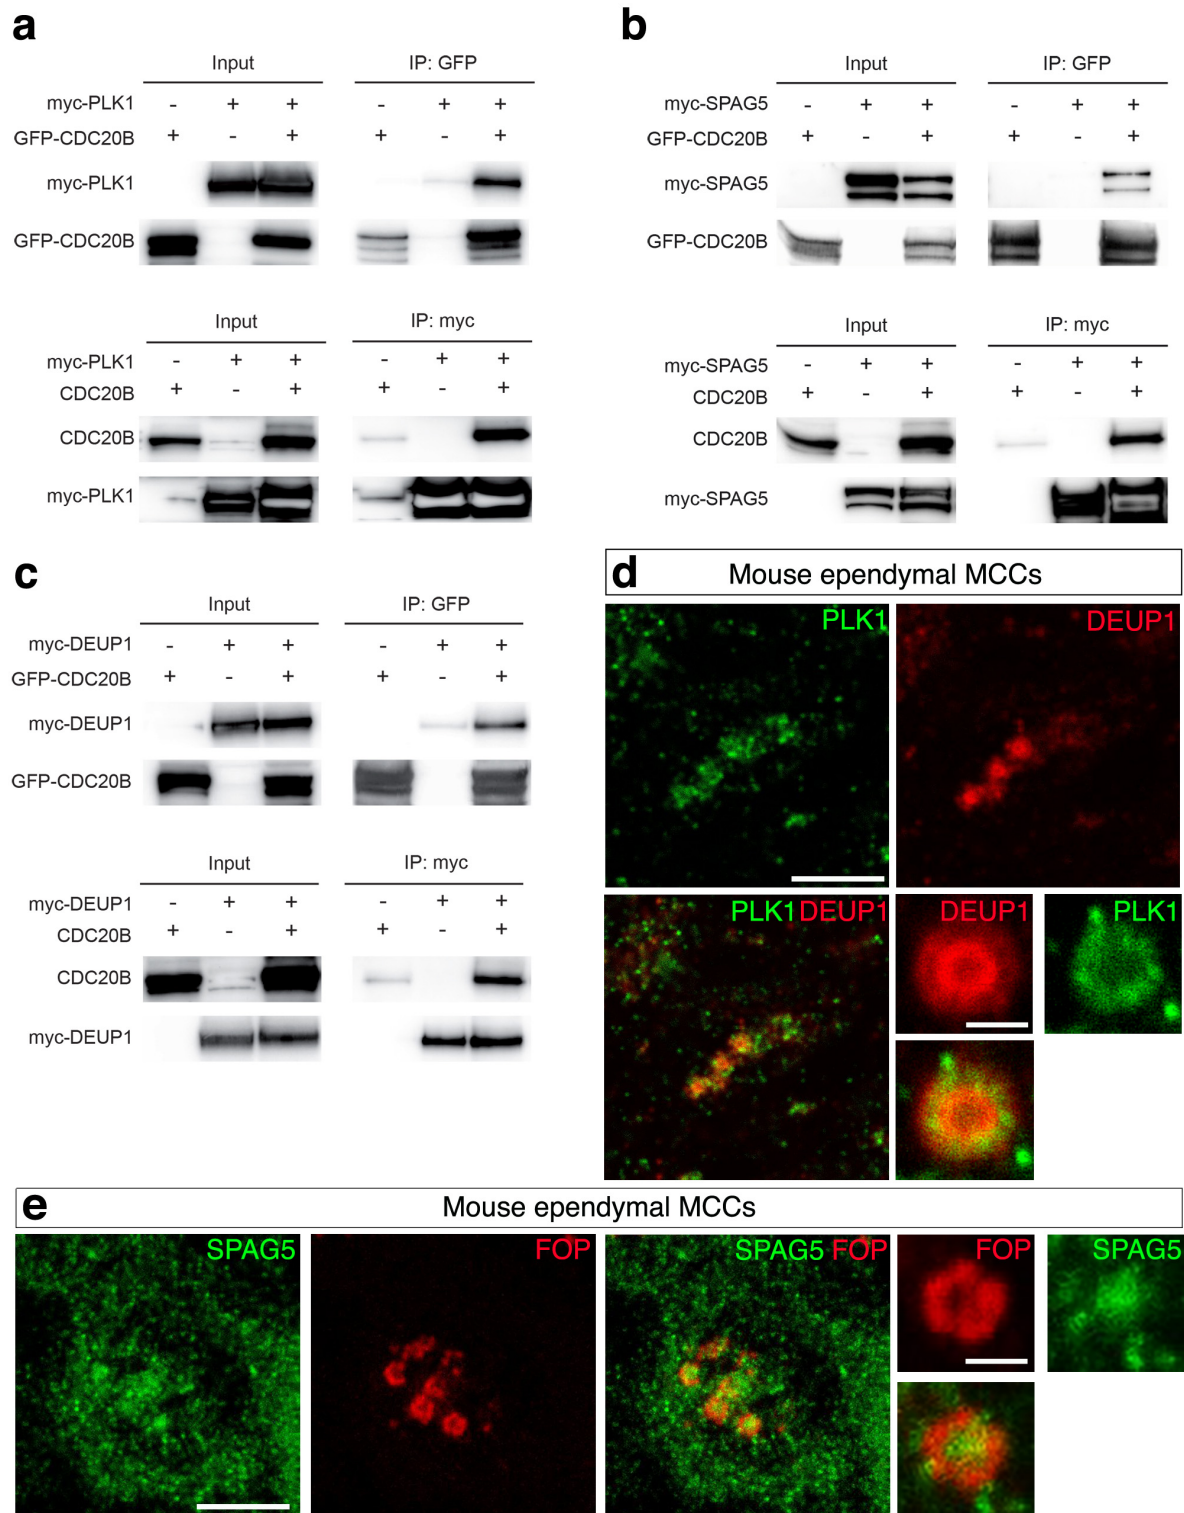

591

592 **Figure 6: CDC20B interacts with PLK1, SPAG5 and DEUP1**

593 (a-c) Co-immunoprecipitations of PLK1, SPAG5 and DEUP1 with CDC20B were tested after

594 transfections of different constructs in HEK cells, indicated at the top of each panel. Proteins

595 (left legend) were revealed by immunoblotting. **(d)** Maturing mouse ependyma were  
596 immunostained for the indicated proteins, and pictures were taken with a confocal microscope.  
597 PLK1 and SPAG5 are expressed in maturing MCCs. High magnifications show that PLK1 is  
598 enriched in the perideuterosomal region, while SPAG5 is enriched in the deuterosome core.  
599 Scale bars: 5 $\mu$ m (**d, e**, large view), 1 $\mu$ m (**d, e**, high magnification).  
600

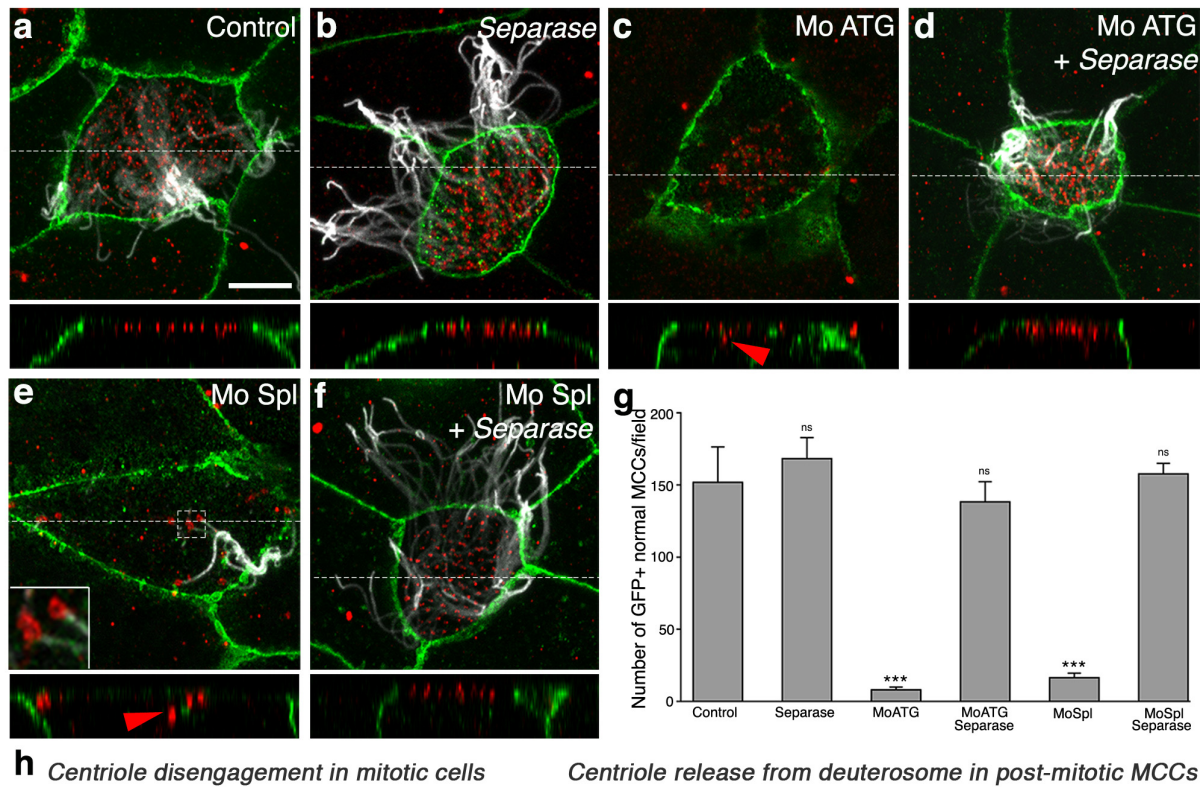

601

602

603

604

605

606

607

608

609

610

611

**Figure 7: Separase overexpression rescues multiciliogenesis in absence of Cdc20b.**

(a-f) 8-cell *Xenopus* embryos were injected in the presumptive epidermis with *GFP-gpi* mRNA, *cdc20b* morpholinos, and human *Separase* mRNA, as indicated. Embryos were fixed at tailbud st25 and immunostained against GFP (injection tracer, green), Acetylated- $\alpha$ -Tubulin (cilia, white) and  $\gamma$ -Tubulin (BBs, red). White dotted lines indicate the position of orthogonal projections shown in bottom panels. Red arrowheads point undocked BBs. Left inset in (e) shows zoom on clustered centrioles. (g) Bar graph showing the number of properly ciliated MCCs among injected cells, per field of observation. Counting was performed on pictures taken at low magnification (20x), in order to score a large number of cells. Separase overexpression fully rescued multiciliogenesis in *cdc20b* morphant MCCs. Scale bars: 5 $\mu$ m (a). (h) Model

612 illustrating the analogy between centriole disengagement in mitotic cells and centriole release  
613 from deuterosomes in post-mitotic MCCs.

614

## 615 **Materials and Methods**

### 616 Subjects/human samples

617 Inferior turbinates were from patients who underwent surgical intervention for nasal obstruction  
618 or septoplasty (provided by L. Castillo, Nice University Hospital, France). The use of human  
619 tissues was authorized by the bioethical law 94-654 of the French Public Health Code and  
620 written consent from the patients.

621

### 622 Single-cell RNA sequencing of HAECs

623 HAECs were cultured as previously described<sup>23</sup>. They were induced to differentiate at the air-  
624 liquid interface for 14 days, which corresponds to the maximum centriole multiplication stage.  
625 Cells were incubated on Transwell® (Corning®, NY 14831 USA) with 0.1% protease type  
626 XIV from *Streptomyces griseus* (Sigma-Aldrich) in HBSS (Hanks' balanced salts) for 4 hours  
627 at 4°C. Cells were gently detached from the Transwells by pipetting and then transferred to a  
628 microtube. 50 units of DNase I (EN0523 Thermo Fisher Scientific) per 250µl, were directly  
629 added and cells were further incubated at room temperature for 10 min. Cells were centrifuged  
630 (150g for 5 min) and resuspended in 500 µL HBSS 10% Fetal Bovine Serum (Gibco),  
631 centrifuged again (150g for 5 min) and resuspended in 500 µL HBSS before being mechanically  
632 dissociated through a 26G syringe (4 times). Finally, cell suspensions were filtered through a  
633 Scienceware® Flowmi™ Cell Strainer (40µm porosity), centrifuged (150g for 5 min) and  
634 resuspended in 500 µL of cold HBSS. Cell concentration measurements were performed with  
635 Scepter™ 2.0 Cell Counter (millipore) and Countess™ automated cell counter (ThermoFisher  
636 Scientific). Cell viability was checked with Countess™ automated cell counter (ThermoFisher



637 Scientific). All steps except the DNase I incubation were performed on ice. For the cell capture  
638 by the 10X genomics device, the cell concentration was adjusted to 300 cells/ $\mu$ l in HBSS aiming  
639 to capture 1500 cells. We then followed the manufacturer's protocol (Chromium™ Single Cell  
640 3' Reagent Kit, v2 Chemistry) to obtain single cell 3' libraries for Illumina sequencing. Libraries  
641 were sequenced with a NextSeq 500/550 High Output v2 kit (75 cycles) that allows up to  
642 91 cycles of paired-end sequencing: the forward read had a length of 26 base that included the  
643 cell barcode and the UMI; the reverse read had a length of 57 bases that contained the cDNA  
644 insert. CellRanger Single-Cell Software Suite v1.3 was used to perform sample demultiplexing,  
645 barcode processing and single-cell 3' gene counting using standards default parameters and  
646 human build hg19. Additional analyses were performed using R. Pseudotemporal ordering of  
647 single cells was performed with the last release of the Monocle package<sup>45</sup>. Cell cycle scores  
648 were calculated by summing the normalized intensities of genes belonging to phase-specific  
649 gene sets then centered and scaled by phase. Gene sets for each phase were curated from  
650 previously described sets of genes<sup>46</sup> (Supplementary Table 1). Data was submitted to the GEO  
651 portal under series reference GSE103518. Data shown in Figure 1 is representative of 4  
652 independent experiments performed on distinct primary cultures.

653

#### 654 RNA sequencing of HAECs

655 For Figure S3A, three independent HAEC cultures (HAEC1, HAEC2, HAEC3) were triggered  
656 to differentiate in air-liquid interface (ALI) cultures for 2 days (ALI day 2, undifferentiated),  
657 ALI day 14 (first cilia) or ALI day 28 (well ciliated). RNA was extracted with the miRNeasy  
658 mini kit (Qiagen) following manufacturer's instructions. mRNA-seq was performed from 2  $\mu$ g  
659 of RNA that was first subjected to mRNA selection with Dynabeads® mRNA Purification Kit  
660 (Invitrogen). mRNA was fragmented 10 min at 95°C in RNaseIII buffer (Invitrogen) then  
661 adapter-ligated, reverse transcribed and amplified (6 cycles) with the reagents from the

662 NEBNext Small RNA Library Prep Set for SOLiD. Small RNA-seq was performed from 500  
663 ng RNA with the NEBNext Small RNA Library Prep Set for SOLiD (12 PCR cycles) according  
664 to manufacturer's instructions. Both types of amplified libraries were purified on Purelink PCR  
665 micro kit (Invitrogen), then subjected to additional PCR rounds (8 cycles for RNA-seq and 4  
666 cycles for small RNA-seq) with primers from the 5500 W Conversion Primers Kit (Life  
667 Technologies). After Agencourt® AMPure® XP beads purification (Beckman Coulter),  
668 libraries were size-selected from 150 nt to 250 nt (for RNA-seq) and 105 nt to 130 nt (for small  
669 RNA-seq) with the LabChip XT DNA 300 Assay Kit (Caliper Lifesciences), and finally  
670 quantified with the Bioanalyzer High Sensitivity DNA Kit (Agilent). Libraries were sequenced  
671 on SOLiD 5500XL (Life Technologies) with single-end 50b reads. SOLiD data were analyzed  
672 with lifescape v2.5.1, using the small RNA pipeline for miRNA libraries and whole  
673 transcriptome pipeline for RNA-seq libraries with default parameters. Annotation files used for  
674 production of raw count tables correspond to Refseq Gene model v20130707 for mRNAs and  
675 miRBase v18 for small RNAs. Data generated from RNA sequencing were then analyzed with  
676 Bioconductor (<http://www.bioconductor.org>) package DESeq and size-factor normalization  
677 was applied to the count tables. Heatmaps were generated with GenePattern using the  
678 "Hierarchical Clustering" Module, applying median row centering and Euclidian distance.

679

#### 680 Re-analysis of *Xenopus* E2F4 Chip-seq and RNA-seq

681 RNA-seq (samples GSM1434783 to GSM1434788) and ChIP-seq (samples GSM1434789 to  
682 GSM1434792) data were downloaded from GSE59309. Reads from RNA-seq were aligned to  
683 the *Xenopus laevis* genome release 7.1 using TopHat2<sup>47</sup> with default parameters. Quantification  
684 of genes was then performed using HTSeq-count<sup>48</sup> release 0.6.1 with "-m intersection-  
685 nonempty" option. Normalization and statistical analysis were performed using Bioconductor  
686 package DESeq2<sup>49</sup>. Differential expression analysis was done between Multicilin-hGR alone

687 versus Multicilin-hGR in the presence of E2f4 $\Delta$ CT. Reads from ChIP-seq were mapped to the  
688 *Xenopus laevis* genome release 7.1 using Bowtie2<sup>50</sup>. Peaks were called and annotated according  
689 to their positions on known exons with HOMER<sup>51</sup>. Peak enrichments of E2F4 binding site in  
690 the promoters of centriole genes and cell cycle genes<sup>9</sup> were estimated in presence or absence of  
691 Multicilin and a ratio of E2F4 binding (Multicilin vs no Multicilin) was calculated.

692

### 693 Promoter reporter studies

694 The human *CDC20B* promoter was cloned into the pGL3 Firefly Luciferase reporter vector  
695 (Promega) with SacI and NheI cloning sites. The promoter sequenced ranged from -1073 to  
696 +104 relative to the transcription start site. 37.5 ng of pGL3 plasmid were applied per well.  
697 pCMV6-Neg, pCMV6-E2F1 (NM\_005225) and pCMV6-E2F4 (NM\_001950) constructs were  
698 from Origene. 37.5 ng of each plasmid was applied per well. 25 ng per well of pRL-CMV  
699 (Promega) was applied in the transfection mix for transfection normalization (Renilla  
700 luciferase). HEK 293T cells were seeded at 20 000 cells per well on 96-well plates. The  
701 following day, cells were transfected with the indicated plasmids (100 ng of total DNA) with  
702 lipofectamine 3000 (Invitrogen). After 24 hours, cells were processed with the DualGlo kit  
703 (Promega) and luciferase activity was recorded on a plate reader.

704

### 705 Proximity ligation Assays

706 Fully differentiated HAECs were dissociated by incubation with 0.1% protease type XIV from  
707 *Streptomyces griseus* (Sigma-Aldrich) in HBSS (Hanks' balanced salts) for 4 hours at 4°C. Cells  
708 were gently detached from the Transwells by pipetting and then transferred to a microtube.  
709 Cells were then cytocentrifuged at 300 rpm for 8 min onto SuperFrostPlus slides using a  
710 Shandon Cytospin 3 cytocentrifuge. Slides were fixed for 10 min in methanol at -20°C for  
711 Centrin2 and ZO1 assays, and for 10 min in 4% paraformaldehyde at room temperature and

712 then permeabilized with 0.5% Triton X-100 in PBS for 10 min for Acetylated- $\alpha$ -tubulin assays.  
713 Cells were blocked with 3% BSA in PBS for 30 min. The incubation with primary antibodies  
714 was carried out at room temperature for 2 h. Then, mouse and rabbit secondary antibodies from  
715 the Duolink® Red kit (Sigma-Aldrich) were applied and slides were processed according to  
716 manufacturer's instructions. Images were acquired using the Olympus Fv10i confocal imaging  
717 systems with 60X oil immersion objective and Alexa 647 detection parameters.

718

### 719 Animals

720 All experiments were performed following the Directive 2010/63/EU of the European  
721 parliament and of the council of 22 September 2010 on the protection of animals used for  
722 scientific purposes. Experiments on *Xenopus laevis* and mouse were approved by the 'Direction  
723 départementale de la Protection des Populations, Pôle Alimentation, Santé Animale,  
724 Environnement, des Bouches du Rhône' (agreement number F 13 055 21). Mouse experiments  
725 were approved by the French ethical committee n°14 (permission number: 62-12112012).  
726 Timed pregnant CD1 mice were used (Charles Rivers, Lyon, France).

727

### 728 Immunostaining on mouse ependyma

729 Immunostaining on ependyma preparations were performed as previously described<sup>52</sup>. Briefly,  
730 dissected brains were subjected to 12 min fixation in 4% paraformaldehyde, 0.1% Triton X-  
731 100, blocked 1 hour in PBS, 3% BSA, incubated overnight with primary antibodies diluted in  
732 PBS, 3% BSA, and incubated 1 h with secondary antibodies at room temperature. Ependyma  
733 were dissected further and mounted with Mowiol before imaging using an SP8 confocal  
734 microscope (Leica microsystems) equipped with a 63x oil objective. The same protocol was  
735 used to prepare samples for super-resolution acquisition. Pictures were acquired with a TCS  
736 SP8 STED 3X microscope equipped with an HC PL APO 93X/1.30 GLYC motCORR™

737 objective (Leica microsystems). Pericentrin was revealed using Alexa 514 (detection 535-  
738 564nm, depletion 660nm),  $\gamma$ -tubulin was revealed using Alexa 568 (detection 582-667nm,  
739 depletion 775), and FOP was revealed using Alexa 488 (detection 498-531nm, depletion  
740 592nm). Pictures were deconvoluted using Huygens software. Maximum intensity projection  
741 of 3 deconvoluted pictures is presented in Figure 4G. Primary antibodies: rabbit anti-CDC20B  
742 (1:500; Proteintech), mouse IgG anti-PLK1 (1:500; Thermo Fisher), rabbit anti-Pericentrin  
743 (1:500, Abcam), mouse IgG2a anti-Securin (1:100; Abcam), rabbit anti-Separase (1:200;  
744 Abcam), mouse IgG1 anti-FoxJ1 (1:1000; eBioscience), rabbit anti-Deup1 (1:1000; kindly  
745 provided by Dr Xueliang Zhu), rabbit anti-Deup1 (1:250; Proteintech), mIgG1 anti- $\gamma$ -Tubulin  
746 (clone GTU88) (1:250; Abcam), rabbit anti-ZO1 (1:600; Thermo Fisher Scientific), rabbit anti-  
747 Spag5 (1:500; Proteintech), mouse IgG1 anti-ZO1 (1:600; Invitrogen), mouse IgG2b anti-  
748 FGFR1OP (FOP) (1:2000; Abnova), mouse IgG1 anti- $\alpha$ -tubulin (1:500; Sigma-Aldrich).  
749 Secondary antibodies: Alexa Fluor 488 goat anti-rabbit (1:800; Thermo Fisher Scientific),  
750 Alexa Fluor 647 goat anti-rabbit (1:800; Thermo Fisher Scientific), Alexa Fluor 514 goat anti-  
751 rabbit (1:800; Thermo Fisher Scientific), Alexa Fluor 488 goat anti-mouse IgG2b (1:800;  
752 Thermo Fisher Scientific), Alexa Fluor 568 goat anti-mouse IgG2b (1:800; Thermo Fisher  
753 Scientific), Alexa Fluor 488 goat anti-mouse IgG2a (1:800; Thermo Fisher Scientific), Alexa  
754 Fluor 568 goat anti-mouse IgG1 (1:800; Thermo Fisher Scientific), Alexa Fluor 647 goat anti-  
755 mouse IgG1 (1:800; Thermo Fisher Scientific).

756

#### 757 Mouse constructs

758 Expression constructs containing shRNA targeting specific sequences in the CDC20B coding  
759 sequence under the control of the U6 promoter were obtained from Sigma-Aldrich (ref.  
760 TRCN0000088273 (sh273), TRCN0000088274 (sh274), TRCN0000088277 (sh277)). PCX-  
761 mcs2-GFP vector (Control GFP) kindly provided by Xavier Morin (ENS, Paris, France), and

762 U6 vector containing a validated shRNA targeting a specific sequence in the NeuroD1 coding  
763 sequence<sup>53</sup>(Control sh, ref. TRCN0000081777, Sigma-Aldrich) were used as controls for  
764 electroporation experiments.

765

#### 766 Postnatal mouse brain electroporation

767 Postnatal mouse brain electroporation was performed as described previously<sup>54</sup>. Briefly, P1  
768 pups were anesthetized by hypothermia. A glass micropipette was inserted into the lateral  
769 ventricle, and 2  $\mu$ l of plasmid solution (concentration 3 $\mu$ g/ $\mu$ l) was injected by expiratory  
770 pressure using an aspirator tube assembly (Drummond). Successfully injected animals were  
771 subjected to five 95V electrical pulses (50 ms, separated by 950 ms intervals) using the CUY21  
772 edit device (Nepagene, Chiba, Japan), and 10 mm tweezer electrodes (CUY650P10, Nepagene)  
773 coated with conductive gel (Signagel, Parker laboratories). Electroporated animals were  
774 reanimated in a 37°C incubator before returning to the mother.

775

#### 776 Statistical analyses of mouse experiments

777 Analysis of CDC20B signal intensity in deuterosomes (graph in Fig. 3b). For each  
778 category, >25 cells from two different animals were analyzed. Deuterosome regions were  
779 delineated based on FOP staining and the intensity of CDC20B fluorescent immunostaining  
780 was recorded using ImageJ software, and expressed as arbitrary units. Unpaired t test vs  
781 immature: p=0,0005 (intermediate,\*\*\*); p<0,0001 (Mature, \*\*\*\*).

782 Analysis of *Cdc20b* shRNAs efficiency (Fig. 4c): For each cell at the deuterosomal stage, the  
783 intensity of CDC20B fluorescent immunostaining was recorded using ImageJ software and  
784 expressed as arbitrary units. Data are mean  $\pm$  sem. Two independent experiments were  
785 analyzed. A minimum of 35 cells per condition was analyzed. n= 3, 4, 5 and 5 animals for sh

786 control, sh273, sh274 and sh277, respectively. Unpaired t test vs sh control:  $p < 0.0001$  (sh273,  
787 sh274 and sh277 \*\*\*\*).

788 Analysis of the number of FOXJ1 positive cells at 5dpe (Fig. 4d): Unpaired t test vs sh control:  
789 0.3961 (sh273, ns), 0.1265 (sh274, ns), 0.3250 (sh277, ns).

790 Analysis of the number of cells with non-disengaged centrioles at 9dpe (Fig. 4g): 15-20 fields  
791 were analyzed per condition.  $n = 4, 4, 3,$  and 4 animals for sh control, sh273, sh274 and sh277,  
792 respectively, from 2 independent experiments. Unpaired t test vs sh control:  $p < 0.0001$  (sh273,  
793 sh274, sh277 \*\*\*\*).

794 Analysis of the number of centrioles per cell at 15dpe (Fig. 4j):  $>100$  cells were analyzed per  
795 condition.  $n = 3, 3, 3,$  and 3 animals for sh control, sh273, sh274 and sh277, respectively, from  
796 2 independent experiments. Unpaired t test vs sh control:  $p < 0.0001$  (sh273, sh274, sh277 \*\*\*\*).

797 Analysis of ependymal cell categories at 15dpe (Fig. 4k): Data are mean  $\pm$  sem from three  
798 independent experiments. More than 500 cells were analyzed for each condition.  $n = 4, 4, 3,$  and  
799 3 animals for sh control, sh273, sh274 and sh277, respectively. Unpaired t test vs sh control:  
800  $p = 0.0004$  (sh273, \*\*\*), 0.0001 (sh274, \*\*\*\*), 0.0038 (sh277, \*\*).

801

#### 802 Mouse tracheal epithelial cells (MTECs)

803 MTECs cell cultures were established from the tracheas of 12 weeks old mice, according to the  
804 procedure previously published<sup>55</sup>, with the following modification: in differentiation medium,  
805 NuSerum<sup>TM</sup> was replaced with Ultrosor-G<sup>TM</sup> (Pall Corporation) and 10  $\mu$ M DAPT (N-[N-(3,5-  
806 difluorophenacetyl)-L-alanyl]-S-phenylglycine t-butyl ester) (Sigma) was added one day after  
807 setting-up the air-liquid interface.

808

#### 809 Immunostaining on HAECs and MTECs

810 Three days after setting-up the air-liquid interface, MTECs on Transwell membranes were pre-  
811 extracted with 0.5% Triton X-100 in PBS for 3 min, and then fixed with 4% paraformaldehyde  
812 in PBS for 15 min at room temperature. HAECs were treated 21 days after setting-up the air-  
813 liquid interface. They were fixed directly on Transwells with 100% cold methanol for 10 min  
814 at -20°C (for CDC20B and Centrin2 co-staining, Supplementary Fig. 4a,b) or with 4%  
815 paraformaldehyde in PBS for 15 min at room temperature (for CDC20B single staining,  
816 Supplementary Fig. 4c). All cells were then permeabilized with 0.5% Triton X-100 in PBS for  
817 5 min and blocked with 3% BSA in PBS for 30 min. The incubation with primary and secondary  
818 antibodies was carried out at room temperature for 2 h and 1 h, respectively. Nuclei were stained  
819 with 4,6-diamidino-2-phenylindole (DAPI). Transwell membranes were cut with a razor blade  
820 and mounted with ProLong Gold medium (Thermofisher). Primary antibodies: rabbit anti-  
821 CDC20B (1:500; Proteintech), rabbit anti-DEUP1 (1:500), anti-Centrin2 (Clone 20H5, 1:500;  
822 Millipore). Secondary antibodies: Alexa Fluor 488 goat anti-rabbit (1:1000; Thermo Fisher  
823 Scientific), Alexa Fluor 647 goat anti-mouse (1:1000; Thermo Fisher Scientific). For co-  
824 staining of CDC20B and DEUP1, CDC20B was directly coupled to CF<sup>TM</sup> 633 with the Mix-n-  
825 Stain<sup>TM</sup> kit (Sigma-Aldrich) according to the manufacturer's instruction. Coupled primary  
826 antibody was applied after secondary antibodies had been extensively washed and after a 30  
827 min blocking stage in 3% normal rabbit serum in PBS.

828

#### 829 Western blot and immunofluorescence analysis of transfected cells

830 Cos1 or Hela cells were grown in DMEM supplemented with 10% heat inactivated FCS  
831 and transfected with Fugene HD (Roche Applied Science) according to manufacturer's  
832 protocol. Transfected or control cells were washed in PBS and lysed in 50 mM Tris-HCl pH  
833 7.5, 150 mM NaCl, 1mM EDTA, containing 1% NP-40 and 0.25% sodium deoxycholate  
834 (modified RIPA) plus a Complete Protease Inhibitor Cocktail (Roche Applied Science) on ice.



835 Cell extracts separated on polyacrylamide gels were transferred onto Optitran membrane  
836 (Whatman) followed by incubation with rabbit anti-mouse CDC20B (1:500, Proteintech) or  
837 homemade rabbit anti-*Xenopus* Cdc20b (1:300) antibody and horseradish peroxidase  
838 conjugated secondary antibody (Jackson ImmunoResearch Laboratories). Signal obtained from  
839 enhanced chemiluminescence (Western Lightning ECL Pro, Perkin Elmer) was detected with  
840 MyECL Imager (Thermo Fisher Scientific).

841 For immunofluorescence staining, transfected cells were grown on glass coverslips and fixed  
842 for 6 min in methanol at -20°C. Cells were washed in PBS, blocked in PBS, 3% BSA and  
843 stained with rabbit anti-*Xenopus* Cdc20b (1:300) or rabbit anti-CFTR (1:200, Santa-Cruz  
844 Biotechnology) as a negative control, in blocking buffer. After washings in PBS 0.1% Tween-  
845 20, cells were incubated with Alexa fluor 488 donkey anti-rabbit antibody (Thermo Fisher  
846 Scientific), washed, and DNA was stained with 250 ng/ml DAPI. Coverslip were then rinsed  
847 and mounted in Prolong Gold antifade reagent (ThermoFisher Scientific) and confocal images  
848 were acquired by capturing Z-series with 0.3 µm step size on a Zeiss LSM 510 laser scanning  
849 confocal microscope.

850

#### 851 Co-immunoprecipitation studies

852 Asynchronous HEK cells were rinsed on ice with chilled Ca<sup>++</sup> and Mg<sup>++</sup> free Dulbecco's PBS  
853 (DPBS, Invitrogen), harvested using a cell scraper and lysed on ice for 5 min in lysis buffer  
854 (0.025M Tris, 0.15M NaCl, 0.001M EDTA, 1% NP-40, 5% glycerol; pH 7.4) supplemented  
855 with EDTA and Halt™ Protease and Phosphatase Inhibitor Cocktail (Pierce, ThermoFisher).  
856 Lysates were clarified (12000g, 4°C, 10 min) and the protein concentrations were determined  
857 using the Bradford assay (Bio-Rad). Immunoprecipitations were performed with the Pierce co-  
858 immunoprecipitation kit (Pierce, ThermoFisher) according to the manufacturer's instructions.  
859 For each immunoprecipitation, 1-1.5 mg of total lysate was precleared on a control column,

860 then incubated on columns coupled with 20  $\mu\text{g}$  of anti-GFP or anti-c-myc-antibody (clone  
861 9E10). Incubation was performed overnight at 4°C. Columns were washed and eluted with 50  
862  $\mu\text{L}$  elution buffer. Samples were denatured at 70°C for 10 min with Bolt™ LDS Sample Buffer  
863 and Bolt reducing agent, then separated on 4-12% gradient Bolt precast gels (ThermoFisher),  
864 transferred onto nitrocellulose (Millipore), and subjected to immunoblot analysis using either  
865 anti-CDC20B (ProteinTech) or anti-c-myc antibody (clone 9E10). In Figure 6, note that the  
866 high level of expression of myc-PLK1 (**a**) and myc-SPAG5 (**b**) drained out locally the ECL  
867 reagent at the peak of the protein. The resulting double bands correspond in fact to unique ones.  
868 Human SPAG5, subcloned into pCMV6-MT, was from OriGene. Human DEUP1 and PLK1  
869 were cloned into pCS2-MT vector (Addgene). Human CDC20B was cloned into pEGFP-C1,  
870 pEGFP-N1 (Clontech) for the GFP fusion protein and pIRES-EYFP (Addgene) for the  
871 untagged protein.

872

### 873 In-Gel digestion, NanoHPLC, and Q-exactiveplus analysis

874 For mass spectrometry analysis, protein spots were manually excised from the gel and destained  
875 with 100  $\mu\text{L}$  of H<sub>2</sub>O/ACN (1/1). After 10 min vortexing, liquid was discarded and the  
876 procedure was repeated 2 times. They were rinsed with acetonitrile and dried under vacuum.  
877 Extracts were reduced with 50  $\mu\text{L}$  of 10 mM dithiothreitol for 30 min at 56 °C, then alkylated  
878 with 15  $\mu\text{L}$  of 55 mM iodoacetamide for 15 min at room temperature in the dark. They were  
879 washed successively by: i) 100  $\mu\text{L}$  of H<sub>2</sub>O/ACN (1/1) (2 times) and ii) 100  $\mu\text{L}$  of acetonitrile.  
880 Gel pieces were rehydrated in 60  $\mu\text{L}$  of 50 mM NH<sub>4</sub>HCO<sub>3</sub> containing 10 ng/ $\mu\text{L}$  of trypsin  
881 (modified porcine trypsin, sequence grade, Promega) incubated for one hour at 4°C. After the  
882 removal of trypsin, samples were incubated overnight at 37°C. Tryptic peptides were extracted  
883 with: i) 60  $\mu\text{L}$  of 1% FA (formic acid) in water (10 min at RT), ii) 60  $\mu\text{L}$  acetonitrile (10 min

884 at RT). Extracts were pooled, concentrated under vacuum, resuspended in 15  $\mu$ L of aqueous  
885 0.1% formic acid for NanoHPLC separation.  
886 Separation was carried out using a nanoHPLC (Ultimate 3000, Thermo Fisher Scientific). After  
887 concentration on a  $\mu$ -Precolumn Cartridge Acclaim PepMap 100 C<sub>18</sub> (i.d. 5 mm, 5  $\mu$ m, 100  $\text{\AA}$ ,  
888 Thermo Fisher Scientific) at a flow rate of 10  $\mu$ L/min, using a solution of H<sub>2</sub>O/ACN/FA  
889 98%/2%/0.1%, a second peptide separation was performed on a 75  $\mu$ m i.d. x 250 mm (3  $\mu$ m,  
890 100  $\text{\AA}$ ) Acclaim PepMap 100 C<sub>18</sub> column (Thermo Fisher Scientific) at a flow rate of 300  
891 nL/min. Solvent systems were: (A) 100% water, 0.1% FA, (B) 100% acetonitrile, 0.08% FA.  
892 The following gradient was used t = 0min 6% B; t = 3 min 6%B; t = 119min, 45% B; t = 120  
893 min, 90% B; t = 130 min 90% B (temperature at 35°C).  
894 NanoHPLC was coupled via a nanoelectrospray ionization source to the Hybrid Quadrupole-  
895 Orbitrap High Resolution Mass Spectrometer (Thermo Fisher Scientific). MS spectra were  
896 acquired at a resolution of 70 000 (200 m/z) in a mass range of 300–2000 m/z with an AGC  
897 target 3e6 value of and a maximum injection time of 100ms. The 10 most intense precursor  
898 ions were selected and isolated with a window of 2m/z and fragmented by HCD (Higher energy  
899 C-Trap Dissociation) with normalized collision energy (NCE) of 27. MS/MS spectra were  
900 acquired in the ion trap with an AGC target 2e5 value, the resolution was set at 17 500 at 200  
901 m/z combined with an injection time of 100 ms.  
902 Data were reprocessed using Proteome Discoverer 2.1 equipped with Sequest HT. Files were  
903 searched against the Swissprot Homo sapiens FASTA database (update of February 2016). A  
904 mass accuracy of  $\pm$  10 ppm was used to precursor ions and 0.02 Da for product ions. Enzyme  
905 specificity was fixed to trypsin, allowing at most two miscleavages. Because of the previous  
906 chemical modifications, carbamidomethylation of cysteines was set as a fixed modification and  
907 only oxydation of methionine was considered as a dynamic modification. Reverse decoy

908 databases were included for all searches to estimate false discovery rates, and filtered using the  
909 Percolator algorithm at a 1% FDR.

910

911 *Xenopus* embryo injections, plasmids, RNAs, and morpholinos

912 Eggs obtained from NASCO females were fertilized *in vitro*, dejellied and cultured as described  
913 previously<sup>56</sup>. All injections were done at the 8-cell stage in one animal-ventral blastomere  
914 (presumptive epidermis), except for electron microscopy analysis for which both sides of the  
915 embryo was injected, and for RT-PCR analysis for which 2-cell embryos were injected.

916 *cdc20b* riboprobe was generated from *Xenopus laevis* cDNA. Full-length sequence was  
917 subcloned in pGEM™-T Easy Vector Systems (Promega). For sense probe it was linearized by  
918 SpeI and transcribed by T7. For antisense probe it was linearized by ApaI and transcribed by  
919 Sp6 RNA polymerase. Synthetic capped mRNAs were produced with the Ambion  
920 mMESAGE mMACHINE Kit. pCS105/GFP-CAAX was linearized with AseI and mRNA  
921 was synthesized with Sp6 polymerase. pCS2-mRFP and pCS2-GFP-gpi were linearized with  
922 NotI and mRNA was synthesized with Sp6 polymerase. pCS-Centrin4-YFP (a gift from  
923 Reinhard Köster, Technische Universität Braunschweig, Germany) was linearized with NotI  
924 and mRNA was synthesized with Sp6 polymerase. pCS2-GFP-Deup1 and pCS2-  
925 Multicilin(MCI)-hGR were kindly provided by Chris Kintner and the mRNAs were obtained  
926 as described previously<sup>8</sup>. Embryos injected with *MCI-hGR* mRNA were cultured in  
927 Dexamethasone 20µM in MBS 0,1X from st11 until fixation. pCS2-Separase wild-type and  
928 phosphomutant 2/4 (protease dead, PD) were provided by Marc Kirchner and Olaf Stemann,  
929 respectively; plasmids were linearized with NotI and mRNAs were synthesized with Sp6  
930 polymerase. *Venus-cdc20b*, *cdc20b-Venus* and *cdc20b* were generated by GATEWAY™  
931 Cloning Technology (GIBCO BRL) from *Xenopus laevis cdc20b* cDNA. *cdc20b* was also  
932 subcloned in pCS2-RFP to make *RFP-cdc20b* and *cdc20b-RFP* fusions. All *cdc20b* constructs

933 were linearized with NotI and mRNAs were synthesized with Sp6 polymerase. Quantities of  
934 mRNA injected: 500pg for *GFP-CAAX*, *RFP*, *GFP-gpi*, *Separase* and *Separase(PD)*; 25 to  
935 500pg for *GFP-Deup1*; 40 to 500pg for *MCI-hGR*; 1ng for *Venus-cdc20b*, *cdc20b-Venus*,  
936 *cdc20b*, and *cdc20b-RFP*; 500pg to 1ng for *RFP-cdc20b*.

937 Two independent morpholino antisense oligonucleotides were designed against *cdc20b*  
938 (GeneTools, LLC). *cdc20b* ATG Mo: 5'-aaatcttcttaacttccagtcacat-3', *cdc20b* Spl Mo 5'-  
939 acacatggcacaacgtaccacacatc-3'. 20ng of MOs was injected per blastomere or 10ng of each Mo  
940 for co-injection.

941

#### 942 PCR and Quantitative RT-qPCR

943 *Xenopus* embryos were snap frozen at different stages and stored at -80°C. Total RNAs were  
944 purified with a Qiagen RNeasy kit (Qiagen). Primers were designed using Primer-BLAST  
945 Software. PCR reactions were carried out using GoTaq® G2 Flexi DNA Polymerase  
946 (Promega). RT reactions were carried out using iScript™ Reverse Transcription Supermix for  
947 RT-qPCR (BIO-RAD). qPCR reactions were carried out using SYBRGreen on a CFX Biorad  
948 qPCR cycler. To check *cdc20b* temporal expression by qPCR we directed primers to exons 9/10  
949 junction (Forward: 5'-ggctatgaattggtgccc-3') and exons 10/11 junction (Reverse: 5'-  
950 gcaggagcagatctggg-3') to avoid amplification from genomic DNA. The relative expression of  
951 *cdc20b* was normalized to the expression of the housekeeping gene *ornithine decarboxylase*  
952 (*ODC*) for which primers were as follows: forward: 5'-gccattgtgaagactctctccattc-3'; reverse: 5'-  
953 ttcgggtgattccttggccac-3'.

954 To check the efficiency of Mo SPL, expected to cause retention of intron1 in the mature mRNA  
955 of *cdc20b* we directed forward (5'-cctcccagagtagtagga-3') and reverse (5'-  
956 gcatgttactttctgctcca-3') primers in exon1 and exon2, respectively.

957 To check the expression of *p53* in morphants by qPCR, primers were as follows: forward: 5'-  
958 cgcagccgctatgagatgatt-3'; reverse: 5'-cacttgccggcacttaatggt-3'. The relative expression of *p53*  
959 was normalized to Histone4 expression (H4) for which primers were as follows: forward: 5'-  
960 ggtgatgccctggatgtgt-3'; reverse: 5'-ggcaaaggaggaaaaggactg-3'.

961

#### 962 Immunostaining on *Xenopus* embryos

963 Embryos were fixed in 4% paraformaldehyde (PFA) overnight at 4°C and stored in 100%  
964 methanol at -20°C. Embryos were rehydrated in PBT and washed in MABX (Maleic Acid  
965 Buffer + Triton X100 0,1% v/v). Next, embryos were incubated in Blocking Reagent (Roche)  
966 2% BR + 15% Serum + MABX with respective primary and secondary antibodies. The anti-  
967 *Xenopus laevis* CDC20B antibody was obtained by rabbit immunization with the peptide  
968 SPDQRRIFSAAANGT (amino acids 495–509) conjugated to keyhole limpet hemocyanin,  
969 followed by affinity purification (Eurogentec). For immunofluorescence, embryos were fixed  
970 at RT in PFA 4% in PBS, and incubated in the CDC20B antibody diluted 1/150 in BSA 3% in  
971 PBS. For all experiments secondary antibodies conjugated with Alexa were used. GFP-CAAX  
972 in Fig. 5g was revealed using a rabbit anti-GFP antibody together with a secondary antibody  
973 coupled to HRP, which was revealed as described previously<sup>23</sup>. To mark cortical actin in MCCs,  
974 embryos were fixed in 4% paraformaldehyde (PFA) in PBT (PBS + 0,1% Tween v/v) for 1h at  
975 room temperature (RT), washed 3x10 min in PBT at RT, then stained with phalloidin-Alexa  
976 Fluor 555 (Invitrogen, 1:40 in PBT) for 4 h at RT, and washed 3x10 min in PBT at RT. Primary  
977 antibodies: mouse anti-Acetylated- $\alpha$ -Tubulin (Clone 6-11B-1, Sigma-Aldrich, 1:1000), rabbit  
978 anti- $\gamma$ -Tubulin (Abcam, 1:500), mouse anti- $\gamma$ -Tubulin (Clone GTU88, Abcam, 1:500), Chicken  
979 anti-GFP (2B scientific, 1:1000), rabbit anti-GFP (Torrey Pines Biolabs, 1:500), mouse anti-  
980 Centrin (Clone 20H5, EMD Millipore; 1:500). Secondary antibodies: Alexa Fluor 647 goat

981 anti-mouse IgG2a (1:500; Thermo Fisher Scientific), Alexa Fluor 488 goat anti-chicken (1:500;  
982 Thermo Fisher Scientific), Alexa Fluor 568 goat anti-rabbit (1:500; Thermo Fisher Scientific).

983

#### 984 In situ hybridization on *Xenopus* embryos

985 Whole-mount chromogenic *in situ* hybridization was performed as described previously<sup>56</sup>.

986 Whole-mount fluorescent *in situ* hybridization (FISH) was performed as described

987 previously<sup>57</sup>. For single staining, all RNA probes were labeled with digoxigenin. For FISH on

988 section, embryos were fixed in 4% paraformaldehyde (PFA), stored in methanol for at least 4

989 h at  $-20^{\circ}\text{C}$ , then rehydrated in PBT (PBS + Tween 0.1% v/v), treated with triethanolamine and

990 acetic anhydride, incubated in increasing sucrose concentrations and finally embedded with

991 OCT (VWR Chemicals). 12 $\mu\text{m}$ -thick cryosections were made. Double FISH on sections was

992 an adaptation of the whole-mount FISH method. 80ng of *cdc20b* digoxigenin-labeled sense and

993 antisense riboprobes and 40ng of antisense  *$\alpha$ -tubulin* fluorescein-labeled riboprobe<sup>58</sup> were used

994 for hybridization. All probes were generated from linearized plasmids using RNA-labeling mix

995 (Roche). FISH was carried out using Tyramide Signal Amplification – TSA TM Plus Cyanine

996 3/Fluorescein System (PerkinElmer). Antibodies: Anti-rabbit-HRP (Interchim, 1:5000), Anti-

997 DigAP (Roche, 1:5000), Anti-DigPOD (Roche, 1:500), Anti-FluoPOD (Roche, 1:500).

998

#### 999 Microscopy

1000 Confocal: Flat-mounted epidermal explants were examined with a Zeiss LSM 780 confocal

1001 microscope. Four-colors confocal z-series images were acquired using sequential laser

1002 excitation, converted into single plane projection and analyzed using ImageJ software.

1003 Scanning Electron Microscopy (SEM): skin epidermis of *Xenopus* embryos from stage 37 was

1004 observed and analyzed into a digital imaging microscope (FEI TENE0). Embryos were

1005 processed as described previously<sup>57</sup>. Transmission Electron Microscopy (TEM): St25 embryos

1006 were fixed overnight at 4°C in 2.5% glutaraldehyde, 2% paraformaldehyde, 0.1% tannic acid  
1007 in a sodium cacodylate buffer 0.05 M pH7.3. Next, embryos were washed 3x15 min in  
1008 cacodylate 0.05 M at 4°C. Post-fixation was done in 1% osmium buffer for 2 h. Next, embryos  
1009 were washed in buffer for 15 min. Then, embryos were washed in water and dehydrated  
1010 conventionally with alcohol, followed by a step in 70% alcohol containing 2% uranyl during 1  
1011 to 2 h at RT, or overnight at 4°C. After 3 times in 100% alcohol, completed with 3 washes of  
1012 acetone. Next, embryos were included in classical epon resin, which was polymerized in oven  
1013 at 60°C for 48 h. Sections of 80 nm were made and analyzed into an FMI TECNAI microscope  
1014 with acceleration of 200kV.

1015

#### 1016 Statistical analysis of *Xenopus* experiments

1017 To quantify the effect of our different experiments, we applied One-way ANOVA analysis and  
1018 Bonferroni's multiple comparisons test (t test). \*\*\*P<0.05; ns = not significant. Statistical  
1019 analyses were done using GraphPad Prism 6.

1020 Fig. 5o and Fig. S6k: 10 cells per condition were analyzed and the total number of Centrin-YFP  
1021 or  $\gamma$ -tubulin positive spots per injected cell was counted.

1022 Fig. 7g: 5 fields (20x zoom) per condition were analyzed, and the total number of properly  
1023 ciliated MCCs based on acetylated  $\alpha$ -tubulin staining among GFP positive cells per field was  
1024 counted. Each field corresponded to a different embryo.

1025 Fig. 5s : 160-200 cells per condition were analyzed. n= 6, 8, and 10 embryos from 3  
1026 independent experiments for control, Mo ATG and Mo Spl, respectively. Unpaired t test vs  
1027 control: p=0,0037 (Mo ATG \*\*) and 0,0004 (Mo Spl \*\*\*).

1028

#### 1029 **Supplementary figures and legends**

1030



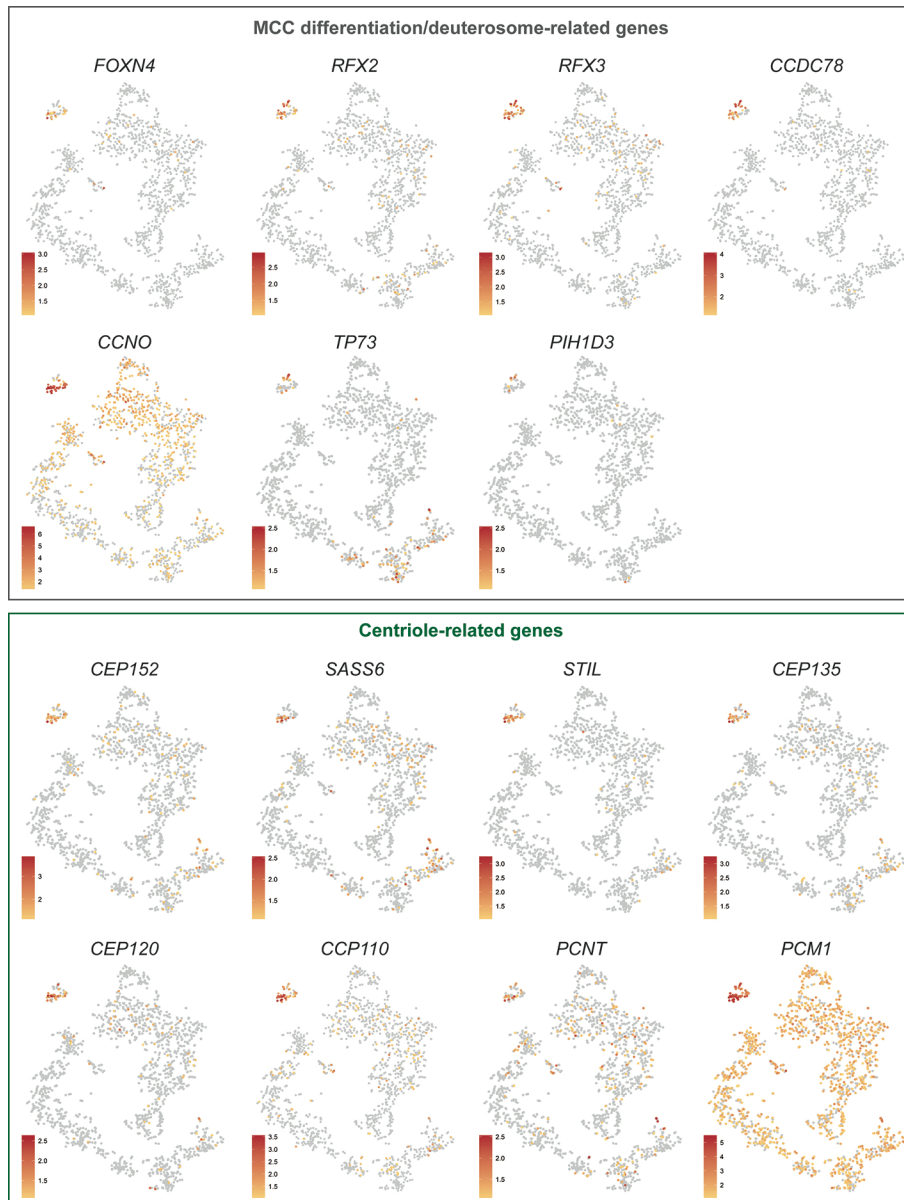

1031

1032

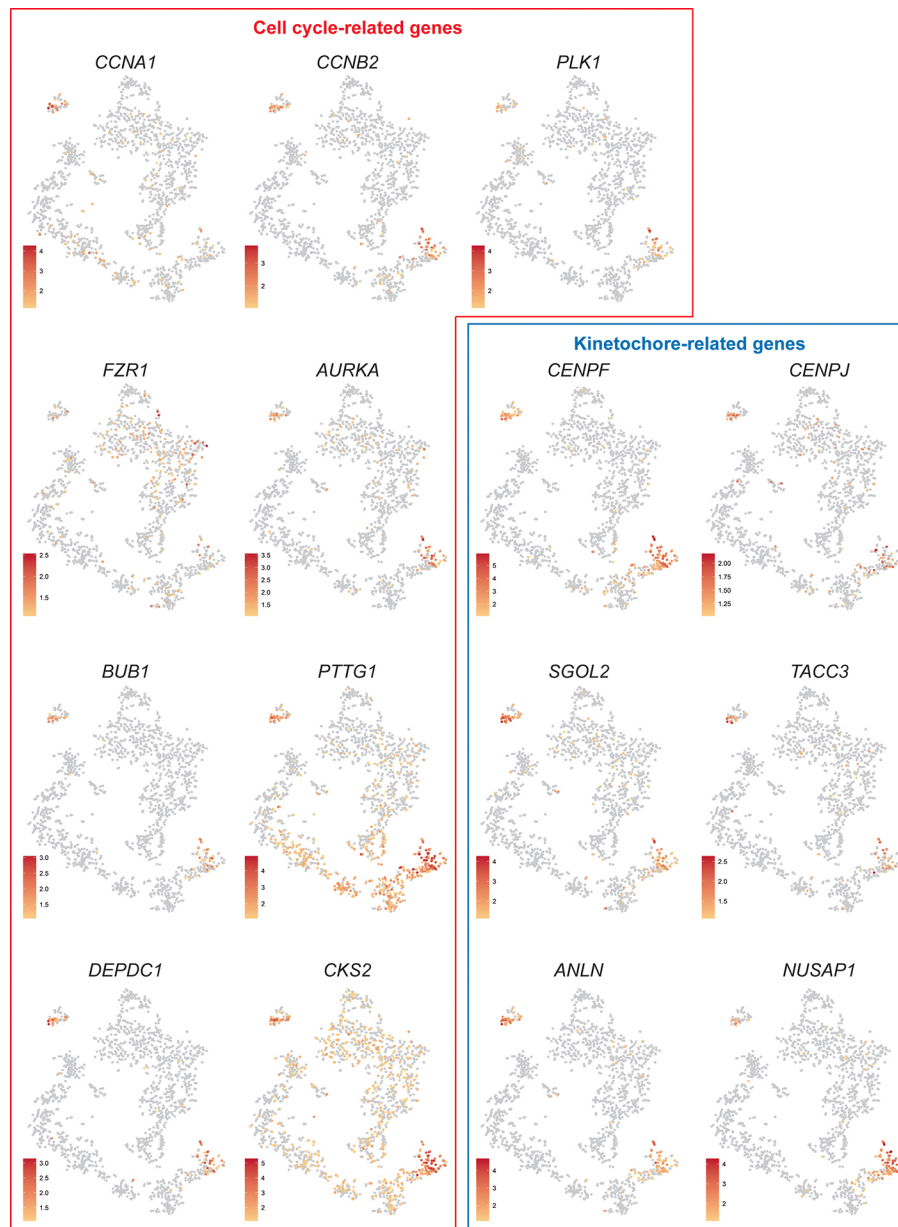

1033

1034 **Supplementary Figure 1: Single cell RNA-seq analysis of HAECs.**

1035 tSNE plots for a selection of genes expressed at the single-cell level, in deuterosomal-stage  
1036 differentiating HAECs. Genes were grouped into functional categories.

1037

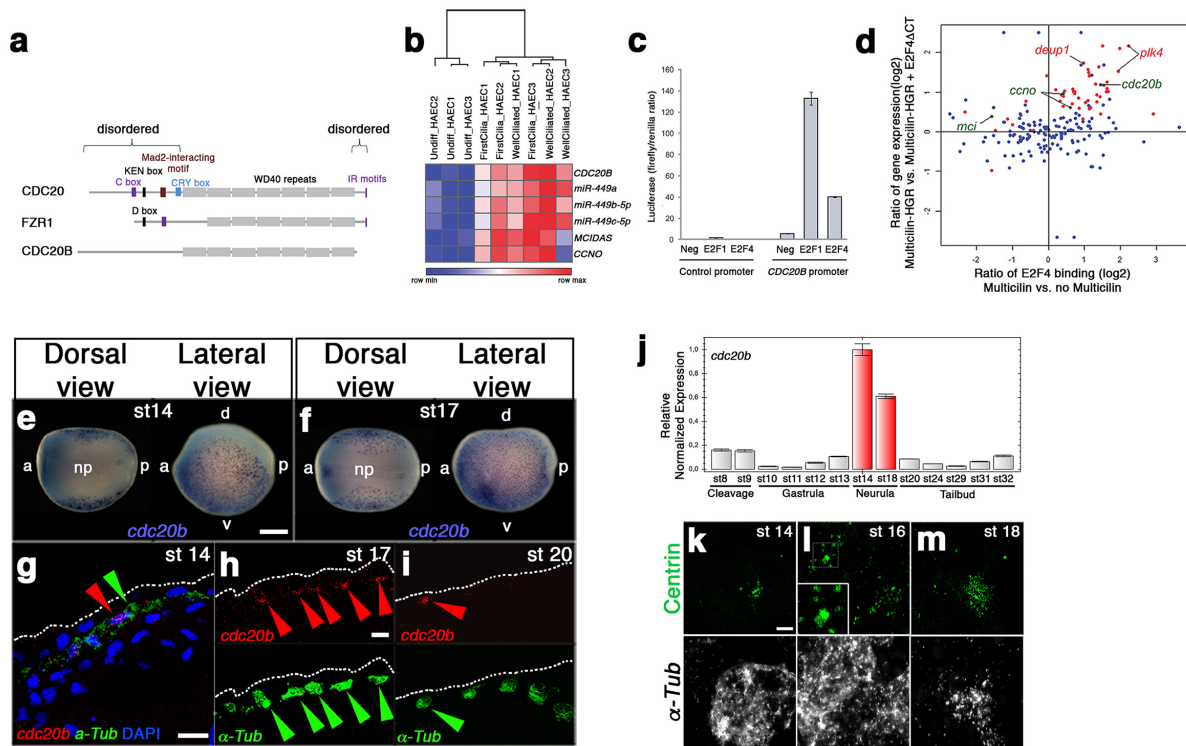

1038

1039 **Supplementary Figure 2: Structure, regulation and sub-cellular localization of CDC20B.**

1040 **Domain composition of CDC20 family members. (a)** The C box and IR motifs in CDC20

1041 and FZR1 serve as APC/C binding domains. The KEN box and the Cry box in CDC20, and the

1042 D box in FZR1 are involved in their regulation by degradation. The Mad2-interacting motif in

1043 CDC20 is important for its regulation by the spindle assembly checkpoint. WD40 repeats are

1044 involved in substrate recognition. Note that CDC20B lacks degradation motifs and the APC/C

1045 binding domains present in CDC20 and FZR1. **CDC20B is induced during multiciliogenesis**

1046 **under the control of E2Fs/MCIDAS. (b)** Heatmap of gene expression measured by RNA-seq

1047 or small RNA-seq on 3 independent HAEC differentiation time courses (HAEC1 to HAEC3).

1048 Normalized read counts were Log2-transformed and median-centered by gene. Hierarchical

1049 clustering (Euclidian distance) was performed on samples. The scale color bar indicates the

1050 minimum and maximum values per row. **(c)** Promoter luciferase reporter assay. Promoter-

1051 associated firefly luciferase was normalized by constitutive renilla luciferase. Control and

1052 *CDC20B* promoter were co-expressed with a plasmid expressing E2F1 or E2F4, or a negative

1053 control. Bars represent the average of 3 independent experiments. Error bars represent the  
1054 standard deviation. **(d)** Ratio of gene expression (Multicilin-HGR vs. Multicilin-HGR  
1055 +E2F4 $\Delta$ CT) vs. ratio of E2F4 binding (Multicilin vs. no Multicilin). E2F4 $\Delta$ CT prevents the  
1056 formation of transcriptionally active Multicilin/E2F complexes. Centriole-related genes are  
1057 highlighted in red. Genes from the multiciliary locus are highlighted in green. The graph was  
1058 built by mapping and quantifying previously published raw data<sup>9</sup>. **CDC20B expression in**  
1059 ***Xenopus epidermis* MCCs. (e,f)** *cdc20b* whole-mount *in situ* hybridization in early neurula  
1060 st14 and st17, respectively. *cdc20b* mRNA is expressed in epidermal cells but not in the neural  
1061 plate (np), as revealed on dorsal views. a: anterior, p: posterior, d: dorsal, v: ventral. **(g-i)** *cdc20b*  
1062 (red) and  $\alpha$ -*Tubulin* ( $\alpha$ -*Tub*, green) double fluorescent *in situ* hybridization (FISH) on sectioned  
1063 embryos at st14 **(g)**, st17 **(h)** and st20 **(i)**. Red and green arrows point immature MCCs co-  
1064 expressing *cdc20b* and  $\alpha$ -*Tub*. Nuclei are revealed by DAPI staining in blue. White dotted lines  
1065 indicate the surface of the epidermis. Note that the majority of MCCs become negative for  
1066 *cdc20b* expression at st20. **(j)** RT-qPCR showing the relative expression of *cdc20b* from st8  
1067 (mid-blastula transition) until tadpole st32 normalized with *ODC* expression. Red bars indicate  
1068 the peak of *cdc20b* transcript accumulation between st14 and st18, when centriole amplification  
1069 occurs. **(k-m)** To reveal the dynamics of centriole multiplication, MCCs were stained by  $\alpha$ -*Tub*  
1070 FISH and by immunostaining against Centrin. Multiple Centrin-positive foci were detected at  
1071 st14, marking the onset of centriologensis. Procentriole aggregates, presumably organized  
1072 around deuterosomes were clearly visualized at st16 (inset). Dispersed multiple centrioles were  
1073 detected at st18. Scale bars: 250 $\mu$ m **(e)**, 20 $\mu$ m **(g,h)**, 5 $\mu$ m **(k)**.

1074

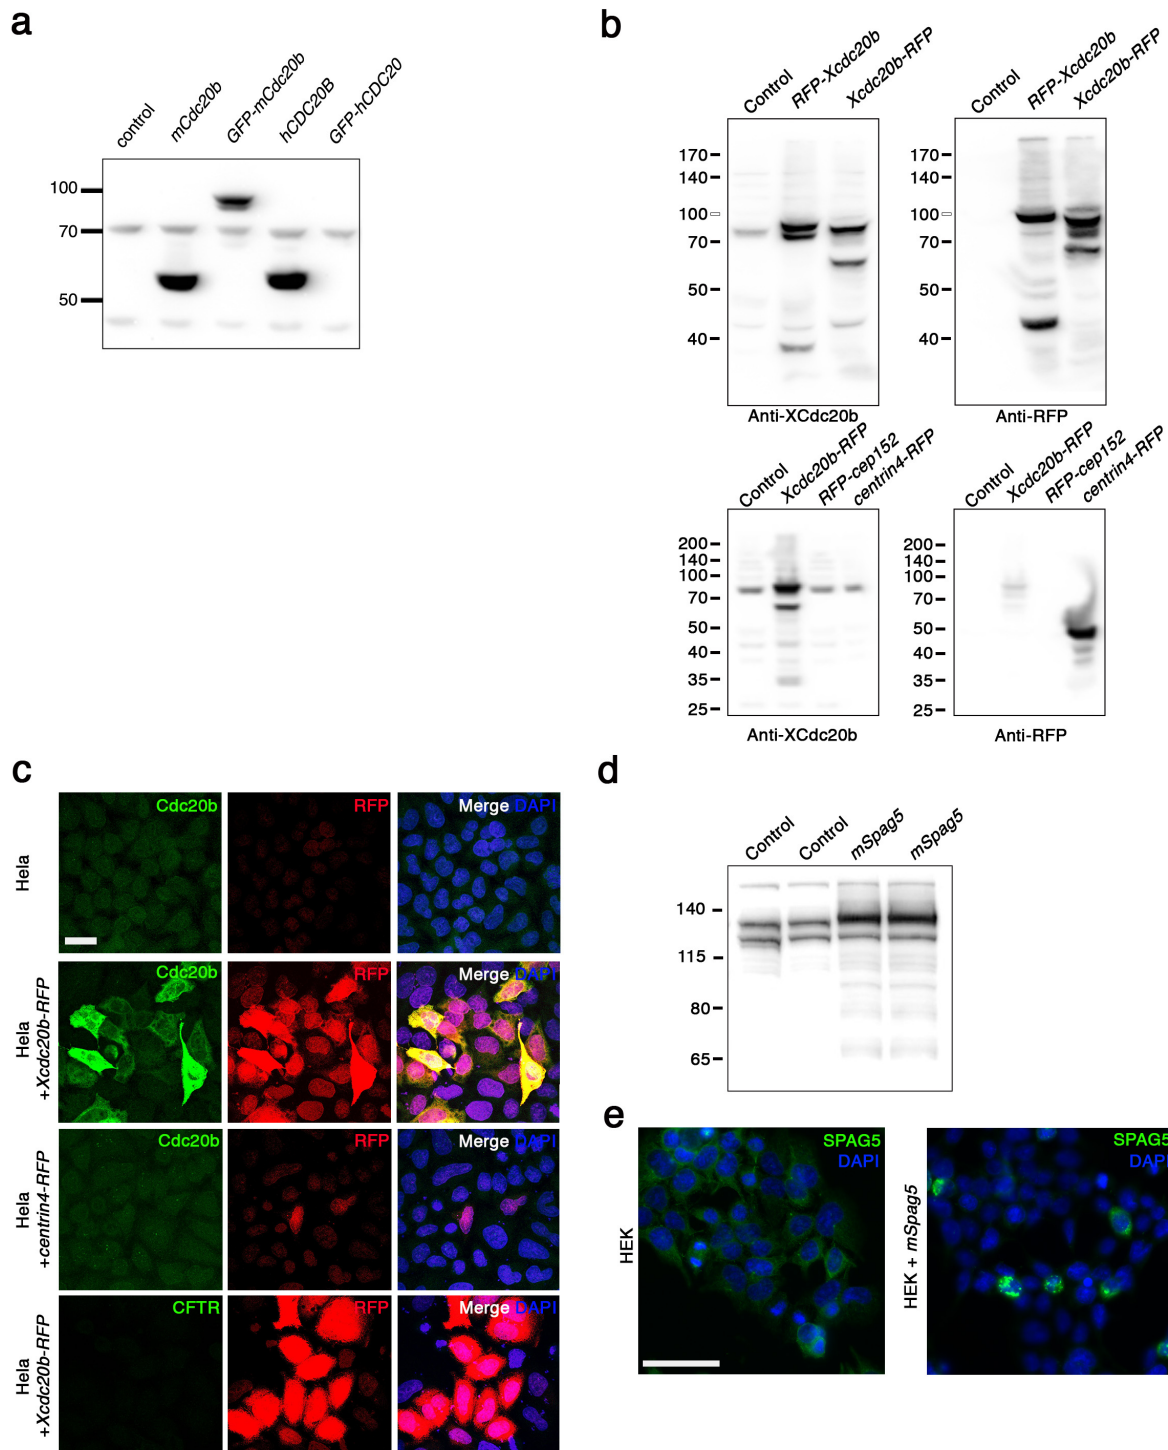

1075

1076 **Supplementary Figure 3: Antibody validations**

1077 **(a)** COS1 cells were transfected with vectors coding for the indicated proteins and immunoblot  
 1078 was performed using Proteintech rabbit antibody raised against human CDC20B. This antibody  
 1079 recognized human and mouse CDC20B but did not cross-react with human CDC20. **(b)** HeLa  
 1080 cells were transfected with vectors coding for the indicated proteins and immunoblot was

1081 performed using a custom-made rabbit antibody raised against *Xenopus* CDC20B. (c) HeLa cells  
1082 were transfected with vectors coding for the indicated proteins and immunostainings were  
1083 performed using the antibodies indicated on the photographs. Note that the antibody directed  
1084 against *Xenopus* CDC20B did not cross-react with the centriole marker Centrin4. (d) HEK cells  
1085 were transfected in duplicate with pCMV6-mSpag5, lysed 24 hours later and western blot was  
1086 performed using proteintech rabbit polyclonal antibody raised against human SPAG5. (e) HEK  
1087 cells were transfected with pCMV6-mSpag5, fixed with methanol 24 hours later and  
1088 immunostained using proteintech rabbit polyclonal antibody raised against human SPAG5.  
1089 This antibody cross-reacted with mouse SPAG5. Scale bars: 20 $\mu$ m (c), 50 $\mu$ m (e).  
1090

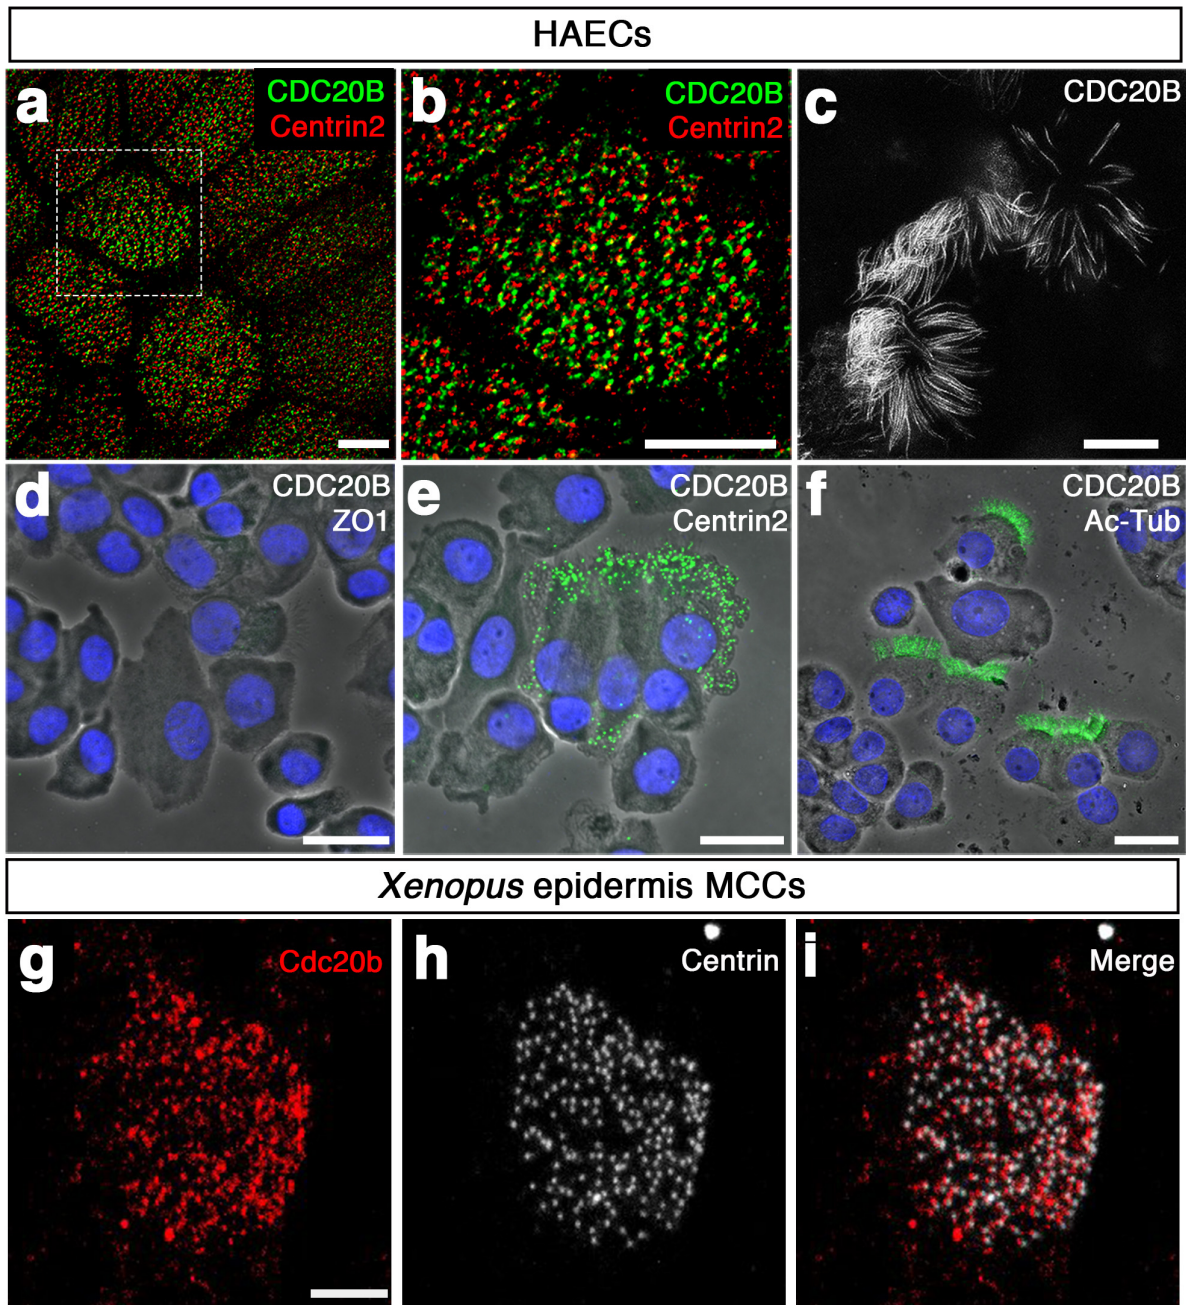

1091

1092 **Supplementary Figure 4: CDC20B localization in mature MCCs.**

1093 **(a-f) CDC20B sub-cellular localization in human mature MCCs.** (a,b) ALI day 21 HAECs  
1094 were fixed in methanol, and immunostained against CDC20B and Centrin2. STED super-  
1095 resolution microscopy revealed the association of CDC20B to BBs. (c) ALI day 21 HAECs  
1096 were fixed in paraformaldehyde, and immunostained against CDC20B. STED super-resolution  
1097 microscopy revealed the association of CDC20B with cilia. (d-f) DuoLink Assays on fully

1098 differentiated HAECs after cytopsin. **(d)** Assay with CDC20B and ZO-1 antibodies was used  
1099 as negative control. **(e)** Assay with CDC20B and Centrin2 (BBs) antibodies. **(f)** Assay with  
1100 CDC20B and Acetylated- $\alpha$ -Tubulin (cilia) antibodies. Interaction between antibodies separated  
1101 by less than 40nm generated green fluorescent signal. Nuclei are stained in blue. **(g-i) Cdc20b**  
1102 **sub-cellular localization in *Xenopus* mature MCCs.** 4-cell *Xenopus* embryos were injected  
1103 with *Multicilin-hGR* mRNA, induced with dexamethasone at stage 10.5 to activate Multicilin  
1104 and immunostained for CDC20B **(g)** and Centrin **(h)** at stage 23. Scale bars: 5 $\mu$ m **(a-c)**, 20 $\mu$ m  
1105 **(d-f)**, 5 $\mu$ m **(g)**.  
1106



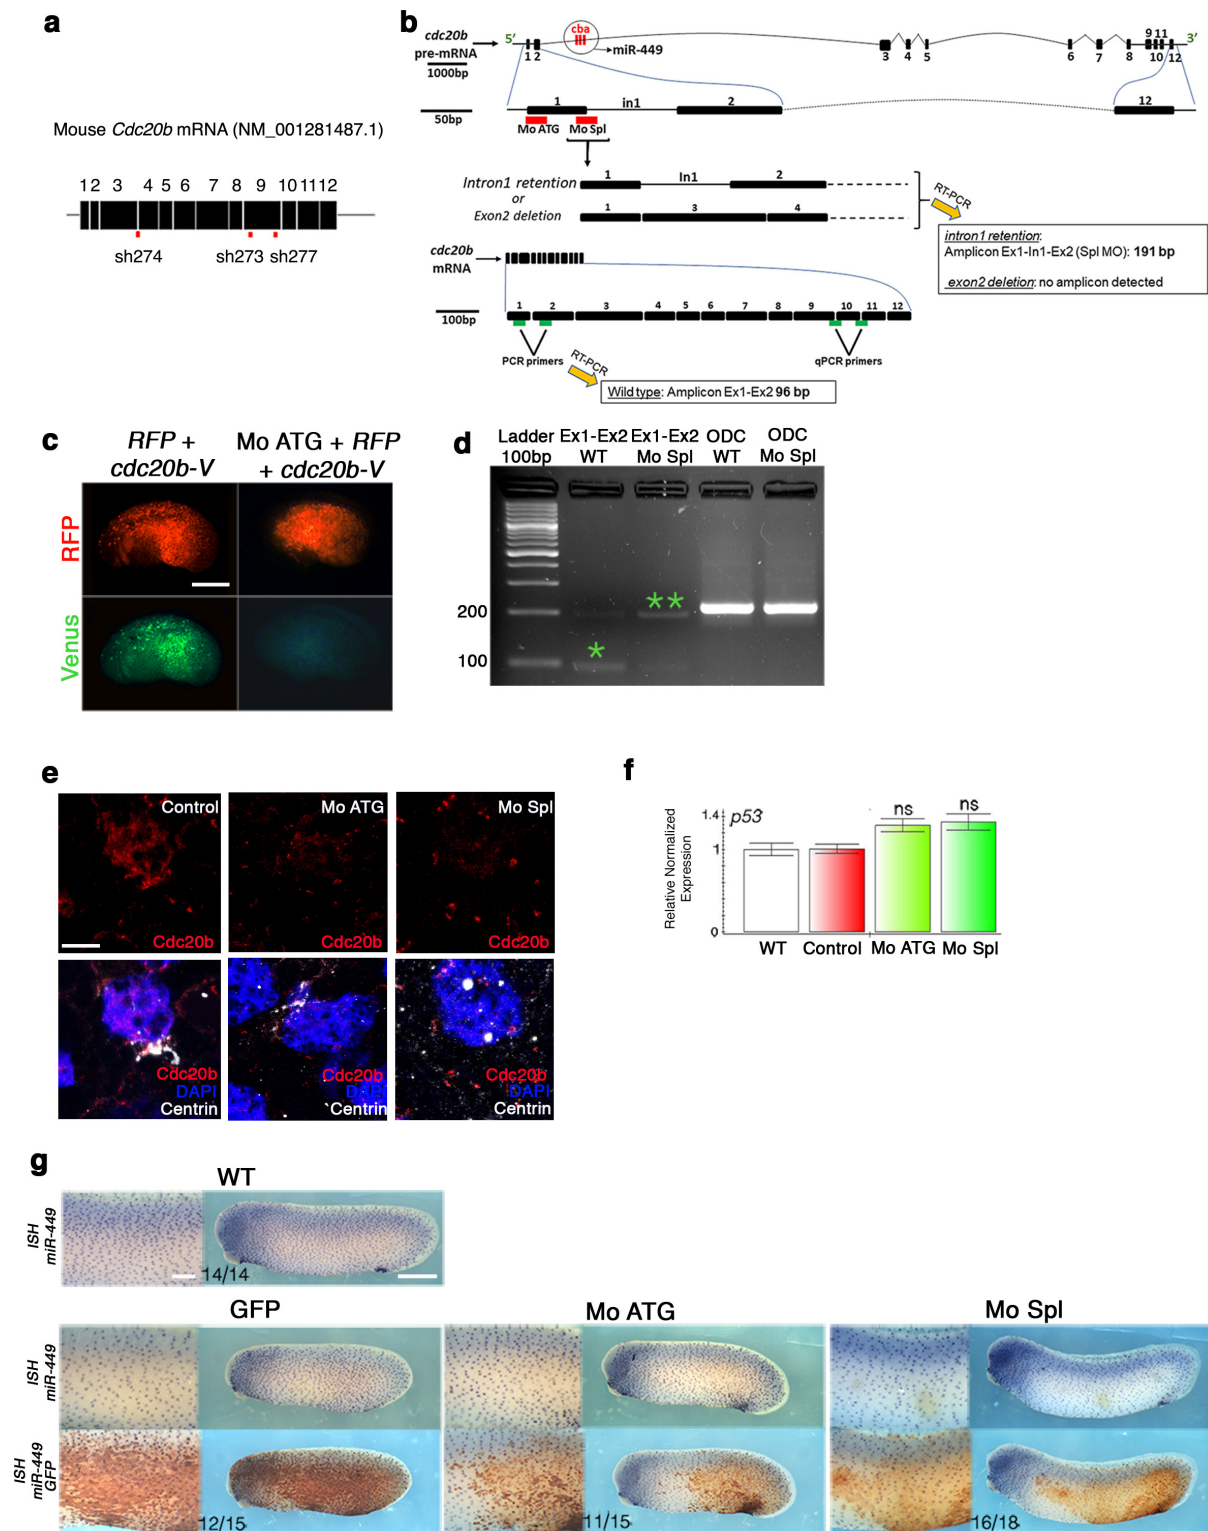

1107

1108 **Supplementary Figure 5: *cdc20b* knockdown in mouse and *Xenopus*.**

1109 (a) Schematic representation of mouse *Cdc20b* mRNA and position of shRNAs used in this

1110 study. Note that sh274 targeted the junction between exons 3 and 4, ruling out possible

1111 interference with the production of miR-449 molecules from the *Cdc20b* pre-mRNA. **(b)**  
1112 Schematic representation of *Xenopus cdc20b* pre-mRNA with introns, exons and miR-449abc  
1113 relative position and size. Red horizontal bars below exon1 show the position of *cdc20b* Mo  
1114 ATG and Mo Spl. On the bottom, green horizontal bars indicate RT-PCR and qPCR primer  
1115 positions. **(c)** The efficiency of Mo ATG was verified through fluorescence extinction of co-  
1116 injected *cdc20b-Venus*. **(d)** RT-PCR confirmed that Mo Spl caused intron1 retention  
1117 (amplicon=191bp; double green stars), which is expected to introduce a premature stop codon  
1118 and to produce a Cdc20b protein lacking 96% of its amino-acids, likely to undergo unfolded  
1119 protein response-mediated degradation. **(e)** Immunostaining with the anti-*Xenopus* CDC20B  
1120 antibody confirmed that both Mo ATG and Mo Spl severely down-regulated CDC20B protein  
1121 expression in st18 MCCs. **(f)** RTqPCR revealed that neither *cdc20b* morpholinos caused  
1122 significant *p53* transcript up-regulation, a non-specific response sometimes detected in  
1123 zebrafish embryos subjected to morpholinos. Four independent experiments were carried out  
1124 to check *p53* expression in morphant conditions. **(g)** miR-449 expression revealed by whole-  
1125 mount *in situ* hybridization with LNA probes was not perturbed in the presence of either  
1126 morpholinos. Embryos were photographed before (top) and after (bottom) staining against co-  
1127 injected GFP-CAAX to be able to detect miR-449 staining. The number of embryos showing  
1128 normal miR-449 expression over the total number of embryos analyzed is indicated on the  
1129 photographs. Scale bars: 500 $\mu$ m **(c)**, 5 $\mu$ m **(e)**, 500 $\mu$ m **(g, whole embryo)**, 80 $\mu$ m **(g, zoom)**.  
1130

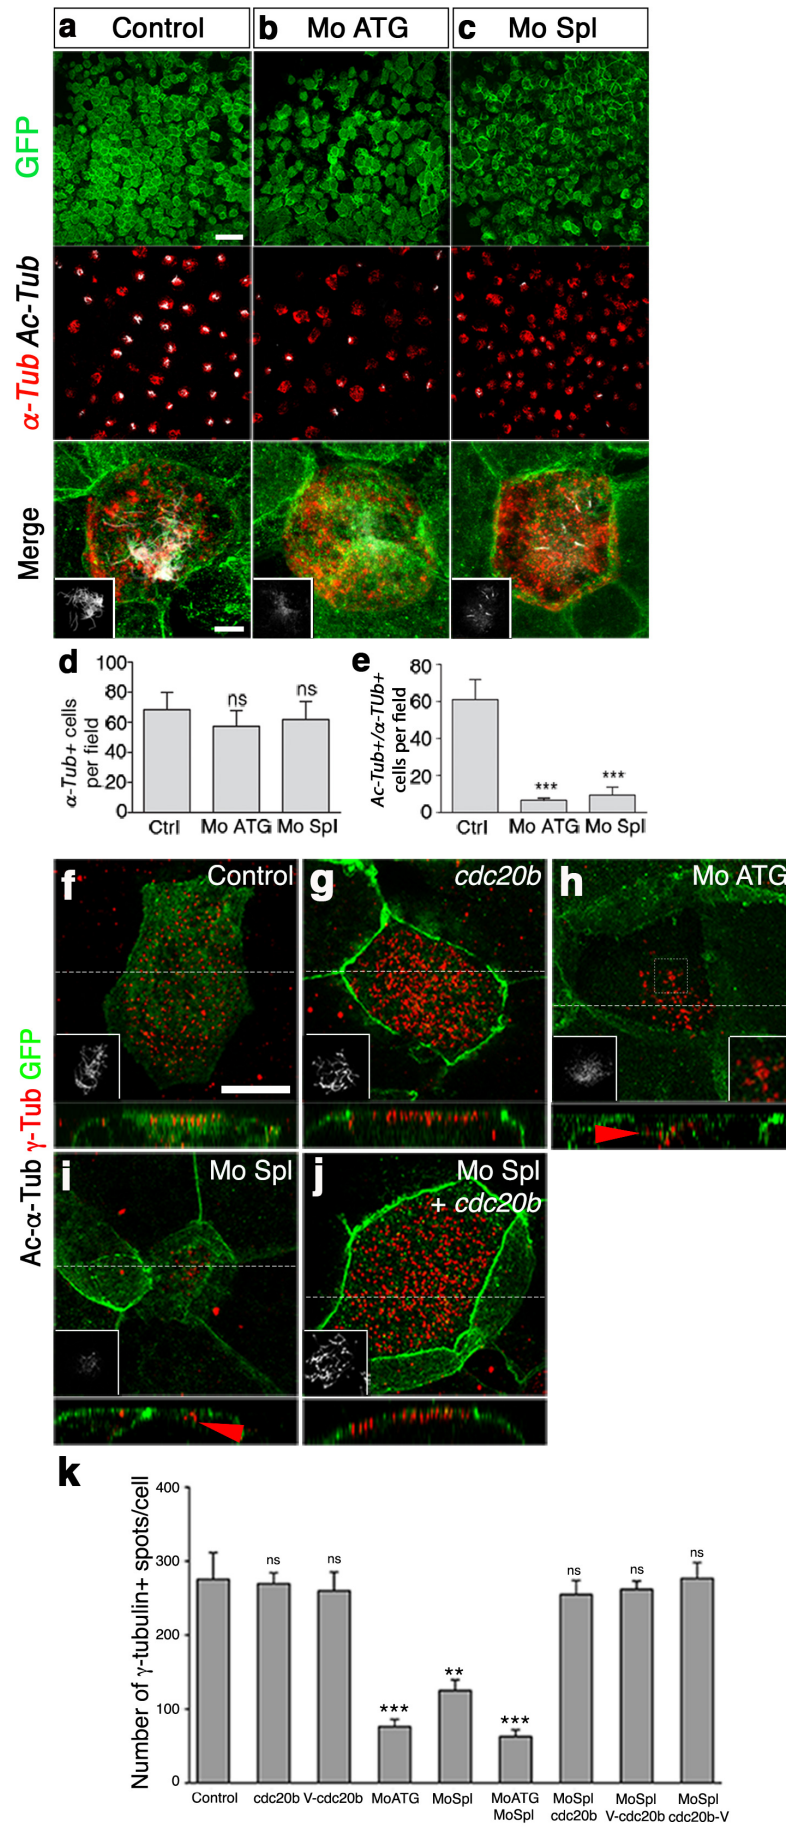

1132 **Supplementary Figure 6: *cdc20b* knockdown impairs multiciliogenesis in *Xenopus*.**

1133 **(a-e)** 8-cell embryos were injected in presumptive epidermis with *cdc20b* morpholinos and  
1134 *GFP-CAAX* mRNA (injection tracer) as indicated. Control was provided by *GFP-CAAX*  
1135 injection alone. Embryos at tailbud st25 were processed for fluorescent staining against GFP  
1136 (green), Acetylated  $\alpha$ -Tubulin (cilia, white) and  *$\alpha$ -Tub* mRNA (MCC marker, red). Insets on  
1137 merged panels show cilia staining. Note that *cdc20b* morphant MCCs maintain expression of  
1138 fate marker  *$\alpha$ -Tub* but poorly grow cilia. **(d)** Bar graph showing quantification of  *$\alpha$ -Tub*/GFP  
1139 double positive cells per field of observation. **(e)** Bar graph showing quantification of  *$\alpha$ -*  
1140 *Tub*/Ac-Tub/GFP triple positive cells per field of observation. 10 fields corresponding to 10  
1141 different embryos were analyzed for each condition. **(f-k)** 8-cell embryos were injected in  
1142 presumptive epidermis with *cdc20b* morpholinos, *GFP-CAAX* and *cdc20b* mRNAs as  
1143 indicated, and immunostained at tailbud st25 against GFP (injection tracer, green),  $\gamma$ -tubulin  
1144 (BBs, red) and Acetylated  $\alpha$ -Tubulin (cilia, white, left insets). Right inset in **h**: zoom on a  
1145 stalled deuterosomal figure. z-projections made along white dotted lines are shown in bottom  
1146 panels. Arrowheads point undocked BBs. **(k)** Bar graph showing the quantification of  $\gamma$ -tubulin  
1147 spots per MCC. As that two individual  $\gamma$ -tubulin spots are detected around each basal body,  
1148 twice as many spots are usually counted as compared to Centrin (Fig. 5j-o). Note that BB  
1149 numbers were restored to normal levels in *cdc20b* Spl morphants injected with tagged and  
1150 untagged versions of *cdc20b*. Scale bars: 50 $\mu$ m (**a**, top), 5 $\mu$ m (**a**, bottom), 5 $\mu$ m (**f**).

1151

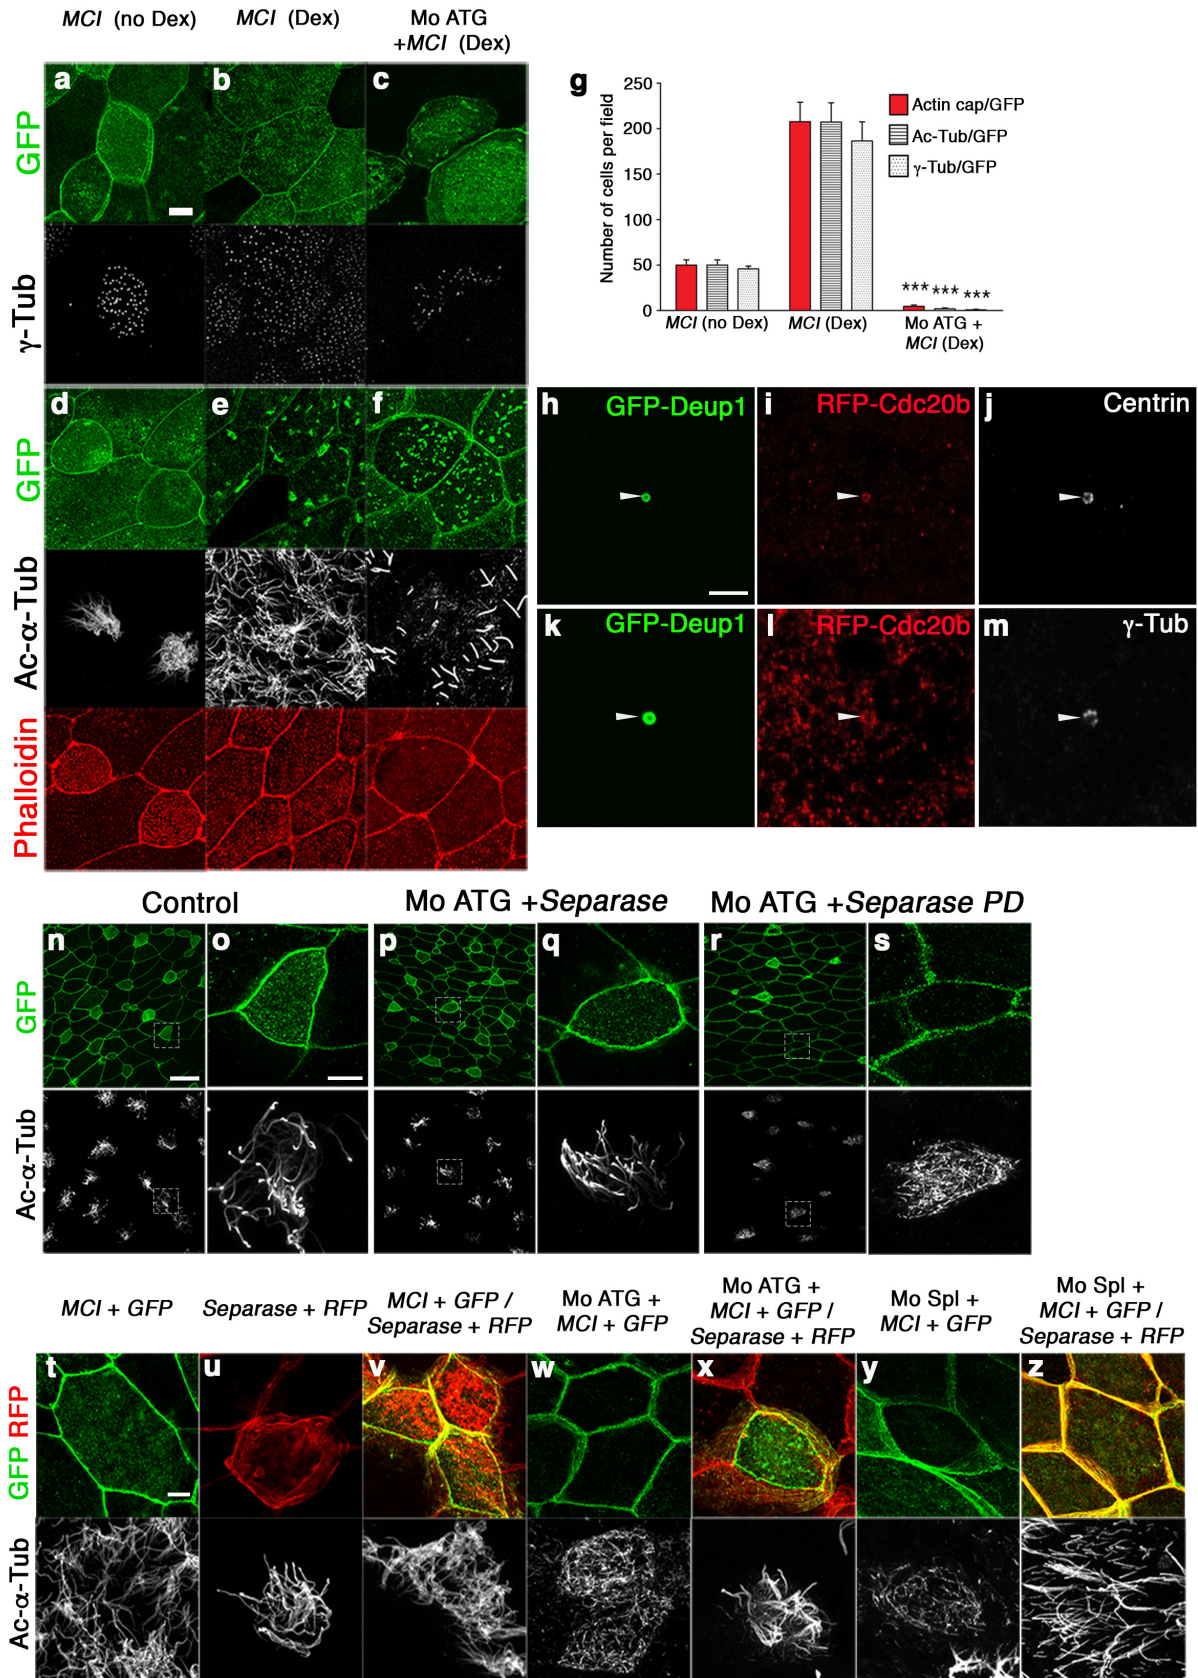

1152

1153 **Supplementary Figure 7: *cdc20b* knockdown prevents multiciliogenesis induced by**

1154 **Multicilin, and is counteracted by Separase overexpression.**

1155 **(a-g) *cdc20b* knockdown prevents multiciliogenesis induced by Multicilin.** 8-cell embryos  
1156 were injected in presumptive epidermis with *Multicilin-hGR* mRNA (*MCI*) and *cdc20b* Mo  
1157 ATG, as indicated. *GFP-GPI* mRNA was co-injected as a tracer. MCI-hGR-injected embryos  
1158 were induced with dexamethasone at st11. To check the efficiency of MCI induction some  
1159 embryos were not treated with dexamethasone and served as controls (no DEX). Embryos were  
1160 fixed at tailbud st25, and were stained against GFP (green) and  $\gamma$ -Tubulin (basal bodies,  
1161 white)(**a-c**), or against GFP (green), phalloidin (apical actin, red), and Acetylated- $\alpha$ -Tubulin  
1162 (cilia, white)(**d-f**). Note that *cdc20b* morphant MCI-induced MCCs failed to amplify centrioles,  
1163 to maintain a proper actin cap, and to grow cilia. (**g**) Bar graph showing the quantification of  
1164 GFP-positive cells that displayed normal actin, basal body and cilium staining. 5 fields (40x)  
1165 per condition were analyzed. **(h-m) Deup1 recruits CDC20B in centriole amplification**  
1166 **platforms.** 8-cell embryos were injected in presumptive epidermis with *Multicilin-hGR*, *RFP-*  
1167 *CDC20B*, and *GFP-Deup1*mRNAs. Multicilin activity was induced with dexamethasone at  
1168 st11, embryos were fixed at st18 and stained for GFP, RFP, Centrin (centrioles) or  $\gamma$ -Tubulin  
1169 (deuterosome). White arrowheads point at active deuterosome-like structures formed around  
1170 overexpressed GFP-Deup1, which incorporate RFP-CDC20B, consistent with their capacity to  
1171 form a complex (Fig. 6c). **(n-z) Wild-type but not protease-dead Separase rescues**  
1172 **multiciliogenesis in MCCs deficient for Cdc20b.** **(n-s)** 8-cell embryos were injected in  
1173 presumptive epidermis with *GFP-GPI* mRNA, human *Separase* mRNA, and *cdc20b* Mo ATG,  
1174 as indicated. Immunofluorescence against GFP (injection tracer, green), and Acetylated- $\alpha$ -  
1175 Tubulin (cilia, white) was performed at tailbud st25. Cells in dotted squares were blown up for  
1176 better visualization. Note that multiciliogenesis was rescued in *cdc20b* morphant MCCs by  
1177 wild-type **(p,q)** but not protease-dead Separase **(r,s)**. **(t-z)** 4-cell embryos were injected in one  
1178 ventral blastomere (presumptive epidermis) with *MCI-hGR* and *GFP-GPI* mRNAs, in the  
1179 presence or not of *cdc20b* morpholinos, as indicated. Next, at 16-cell stage, half of those

1180 embryos were injected with human *Separase* and RFP mRNAs in one ventral-animal  
1181 blastomere. This setup was designed to avoid co-injection of *cdc20b* morpholinos with  
1182 *Separase* mRNA, ruling out non-specific interference *in vitro* between these reagents. MCI-  
1183 hGR-injected embryos were induced with dexamethasone at st11. All embryos were fixed at  
1184 tailbud st25 and stained for GFP (*cdc20b* Mo tracer, green), RFP (*Separase* tracer, red) and  
1185 Acetylated- $\alpha$ -Tubulin (cilia, white). Note that multiciliogenesis failed in MCI-induced *cdc20b*  
1186 morphant MCCs (**w,y**). The presence of *Separase* rescued multiciliogenesis in MCI-induced  
1187 *cdc20b* morphant MCCs (**x,z**). Scale bars: 5 $\mu$ m (**a, h, o, t**), 20 $\mu$ m (**n**).  
1188

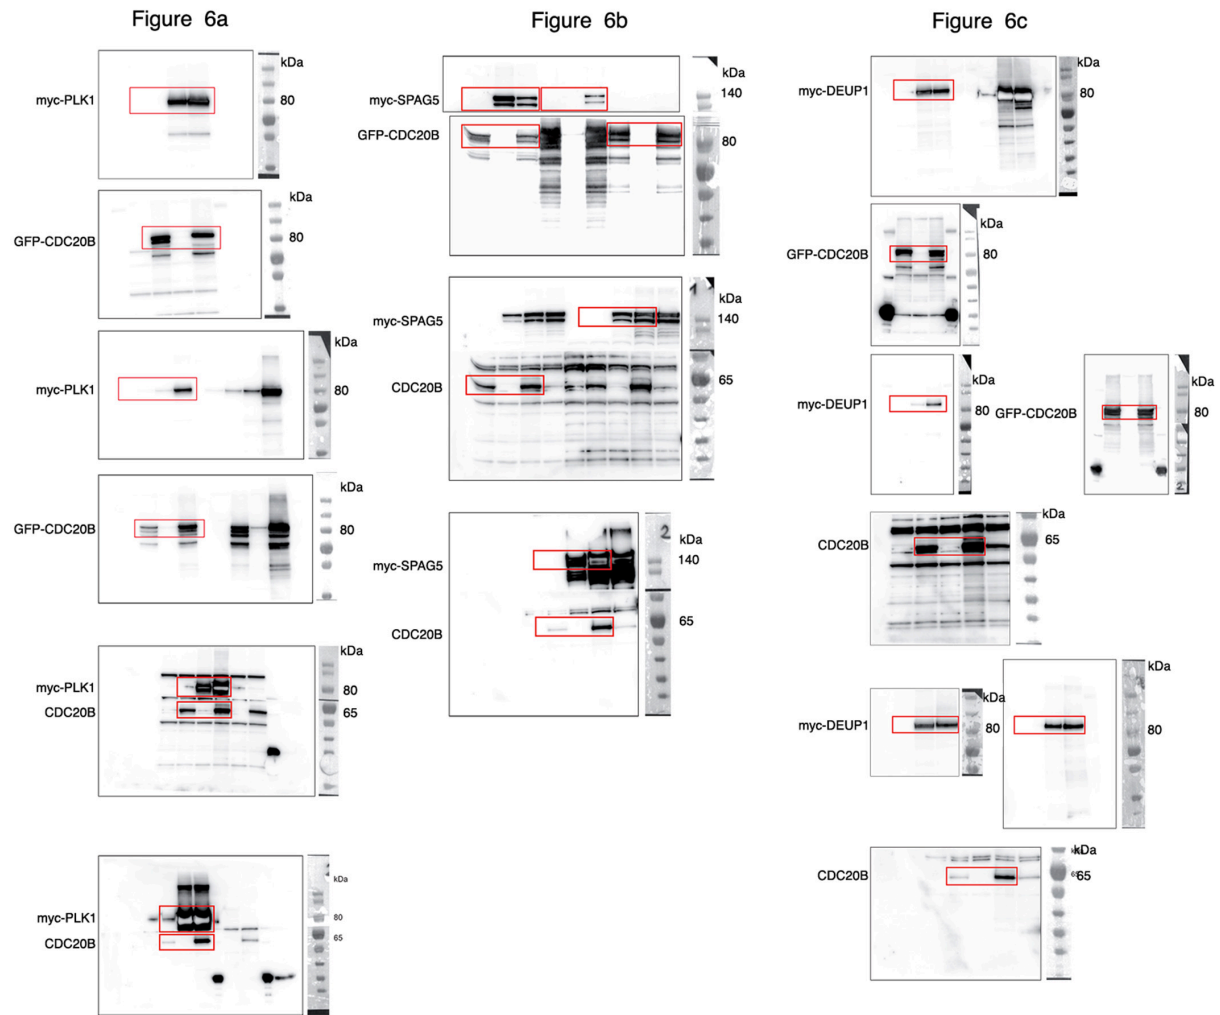

1189

1190 **Supplementary Figure 8: Uncropped Western blots.**

1191 Red boxes mark the parts of the Western blot images that are shown in the indicated parts of

1192 Figure 6.

1193



| G1/S      |                 | S        |                 | G2/M     |                 | M        |                 | M/G1     |                 |
|-----------|-----------------|----------|-----------------|----------|-----------------|----------|-----------------|----------|-----------------|
| Symbol    | Ensembl         | Symbol   | Ensembl         | Symbol   | Ensembl         | Symbol   | Ensembl         | Symbol   | Ensembl         |
| ORC1      | ENS000000085840 | ANKRD18A | ENS000000273170 | IQGAP3   | ENS000000183856 | CKS1B    | ENS000000268942 | TROAP    | ENS000000135451 |
| ZNF367    | ENS000000165244 | REP1     | ENS000000098615 | TRAF1    | ENS000000183763 | PDPC1B   | ENS000000354999 | CDKN3    | ENS000000100226 |
| ADAMTS1   | ENS000000154734 | DEPDC7   | ENS000000121690 | CDK5C    | ENS000000158402 | SHCBP1   | ENS000000171241 | PRCL     | ENS000000198901 |
| CCNE2     | ENS000000175305 | CDC7     | ENS000000097046 | NEL1     | ENS000000109674 | FAM64A   | ENS000000129195 | HS1D7B11 | ENS000000198189 |
| CDC25A    | ENS000000164045 | DNA2     | ENS000000138346 | PIF1     | ENS000000140451 | FYN      | ENS000000108100 | BTBD3    | ENS000000132640 |
| RECQL4    | ENS000000160957 | EXO1     | ENS000000174371 | KIFC1    | ENS000000237649 | KIF2C    | ENS000000142945 | SLC38A10 | ENS000000196950 |
| DTL       | ENS000000143476 | WDLX1    | ENS000000134901 | HUJRP    | ENS000000123485 | SPAG5    | ENS000000076382 | GTFC4    | ENS000000125484 |
| CDK5      | ENS000000094804 | ANKRD18A | ENS000000180971 | NCAPH    | ENS000000121152 | CTC1     | ENS000000122966 | WWC1     | ENS000000113645 |
| CCNE1     | ENS000000105173 | BRP1     | ENS000000136492 | KIF23    | ENS000000137807 | CENPA    | ENS000000115163 | ELP3     | ENS000000134014 |
| MCM2      | ENS000000073111 | PKMYT1   | ENS000000127564 | SKA3     | ENS000000165480 | DIAPH3   | ENS000000139734 | FOXK2    | ENS000000141568 |
| GINS3     | ENS000000181938 | CDC45    | ENS000000093009 | KIAA1524 | ENS000000163507 | CADMI1   | ENS000000182985 | OPN3     | ENS000000054277 |
| CHAF1B    | ENS000000159259 | CT1orf82 | ENS000000165490 | NDCC80   | ENS000000080986 | KIF14    | ENS000000118193 | KIAA0586 | ENS000000100578 |
| WDR75     | ENS000000092470 | RLM      | ENS000000197299 | CNCF     | ENS000000162063 | PLI1     | ENS000000166851 | ANTXR1   | ENS000000169504 |
| MCM6      | ENS000000076003 | RAD51    | ENS000000051180 | CDCAR    | ENS000000134690 | MDC1     | ENS000000137337 | CEP70    | ENS000000114107 |
| CLSPN     | ENS000000092853 | CCDC150  | ENS000000144395 | PSRC1    | ENS000000134222 | DEPDC1   | ENS000000042526 | HMGCR    | ENS000000113161 |
| CDCA7     | ENS000000144354 | CDC45    | ENS000000146670 | FANCD2   | ENS000000144554 | BUB1     | ENS000000169679 | TULP4    | ENS000000130338 |
| OSBP16    | ENS000000079156 | CPN8     | ENS000000139117 | ESPL1    | ENS000000135476 | DUGAP5   | ENS000000143228 | ZNF281   | ENS000000162702 |
| RAB23     | ENS000000122210 | MCMB8    | ENS000000125885 | CDK2     | ENS000000140743 | NUF2     | ENS000000143228 | CDK7     | ENS000000134058 |
| PLCKD1    | ENS000000182378 | ESCO2    | ENS000000171320 | AURKB    | ENS000000178999 | CEP55    | ENS000000138180 | LYAR     | ENS000000145220 |
| SKP2      | ENS000000145604 | GOLGA8B  | ENS000000215252 | BORA     | ENS000000136122 | GTSE1    | ENS000000075218 | PPP6R3   | ENS000000110075 |
| MDM1      | ENS000000111554 | ASF1B    | ENS000000105011 | LMNB1    | ENS000000113368 | HMMR     | ENS000000072571 | DCPIA    | ENS000000162290 |
| GINS2     | ENS000000131153 | FANCA    | ENS000000187741 | TRIM59   | ENS000000131186 | FOXM1    | ENS000000112026 | FAM189B  | ENS000000160767 |
| E2F1      | ENS000000101412 | INTS7    | ENS000000143493 | CHEK2    | ENS000000148375 | E2F5     | ENS000000133740 | AGPAT3   | ENS000000160216 |
| MCM5      | ENS000000100297 | POLA1    | ENS000000101868 | MND1     | ENS000000121211 | PRR11    | ENS000000068489 | PSEN1    | ENS000000080815 |
| SMHG10    | ENS000000247092 | FANCI    | ENS000000140525 | CDC42    | ENS000000184661 | NEK2     | ENS000000117650 | NUP37    | ENS000000075188 |
| HSF2      | ENS000000025156 | RRM2     | ENS000000171848 | CKAP2L   | ENS000000169607 | TACC3    | ENS000000138100 | MSL1     | ENS000000188895 |
| UBR7      | ENS00000012963  | TTIL     | ENS000000137941 | STIL     | ENS000000123473 | CENPE    | ENS000000138778 | AGF1     | ENS000000173744 |
| NUM3      | ENS000000175643 | RAD51AP1 | ENS000000111247 | POLL1    | ENS000000001341 | CNBR2    | ENS000000157456 | SNUPN    | ENS000000169371 |
| ACD       | ENS000000120253 | KAT1B    | ENS000000114166 | PCLO     | ENS000000114166 | CDK20    | ENS000000117399 | STAG1    | ENS000000118007 |
| RCM       | ENS000000102977 | CHML     | ENS000000203668 | CENPL    | ENS000000120334 | BIRC5    | ENS000000089685 | LRIF1    | ENS000000121931 |
| ZMYND19   | ENS000000165724 | BRCA1    | ENS000000012048 | LX1L     | ENS000000152022 | CDC8B8A  | ENS000000115355 | PAK1P1   | ENS000000118455 |
| MSH2      | ENS000000095002 | ABHD10   | ENS000000144827 | KIF11    | ENS000000138160 | POC1A    | ENS000000164087 | NCOA3    | ENS000000124151 |
| CDCA7L    | ENS000000164649 | TYMS     | ENS000000176890 | CL4orf80 | ENS000000185347 | MIK17    | ENS000000148773 | PTTG1    | ENS000000164611 |
| KIAA1586  | ENS000000168116 | PRM1     | ENS000000158056 | UBE2C    | ENS000000175063 | ANKRD40  | ENS000000154945 | CTRN     | ENS000000198730 |
| PMS1      | ENS000000064933 | TTG31    | ENS000000115282 | NCAPD3   | ENS000000115503 | HPA13    | ENS000000155304 | DKC1     | ENS000000130826 |
| UNG       | ENS000000076248 | E2F8     | ENS000000129173 | HAUS8    | ENS000000131351 | CDC25B   | ENS000000101224 | FOPNL    | ENS000000133939 |
| KIAA1147  | ENS000000257093 | CENPQ    | ENS000000031691 | FAM83D   | ENS000000101447 | TPX2     | ENS000000088325 | VCL      | ENS000000035403 |
| POLD3     | ENS000000077514 | PHTF1    | ENS000000116793 | CDK1     | ENS000000170312 | AURKA    | ENS000000087586 | MRP52    | ENS000000122140 |
| ANKRD10   | ENS000000088448 | MAS1L    | ENS000000120539 | MAD2L1   | ENS000000164109 | ANKRD40  | ENS000000154945 | WIPF2    | ENS000000171475 |
| CHAF1A    | ENS000000167670 | OSGIN2   | ENS000000164823 | GABRB1   | ENS000000104064 | CENPF    | ENS000000117724 |          |                 |
| BARD1     | ENS000000138376 | GOLGA8A  | ENS000000175265 | SAP30    | ENS000000164105 | CNTROB   | ENS000000170037 |          |                 |
| INTS8     | ENS000000164941 | PHTF2    | ENS000000066576 | IFIT2    | ENS000000197766 | NCAPD2   | ENS00000010292  |          |                 |
| APEX2     | ENS000000189188 | BBS2     | ENS000000125124 | TTF7     | ENS000000116830 | SGOL2    | ENS000000163535 |          |                 |
| ACYP1     | ENS000000119640 | BMI1     | ENS000000158283 | MID1     | ENS000000101871 | SIF      | ENS000000112558 |          |                 |
| MRL1      | ENS000000037757 | FEN1     | ENS000000168496 | GAS1     | ENS000000180447 | DZIP3    | ENS000000198919 |          |                 |
| INSR      | ENS000000171105 | RM1      | ENS000000178966 | TUBA1A   | ENS000000167552 | ECT2     | ENS000000114346 |          |                 |
| TOPBP1    | ENS000000163781 | NSUN3    | ENS000000178694 | ZNF587   | ENS000000198466 | ORAOV1   | ENS000000149716 |          |                 |
| FAM105B   | ENS000000154124 | KAT2A    | ENS000000108773 | TUBB1    | ENS000000108423 | NUP35    | ENS000000163002 |          |                 |
| NPAT      | ENS000000149308 | CENPM    | ENS000000100152 | FANL     | ENS000000198690 | NUP98    | ENS000000169410 |          |                 |
| PCDH7     | ENS000000169851 | ZWINT    | ENS000000122952 | CDKN2C   | ENS000000123080 | HS2T1    | ENS000000153936 |          |                 |
| GMNN      | ENS000000112312 | ORC3     | ENS000000135336 | TUBB2A   | ENS000000137267 | RCAN1    | ENS000000159200 |          |                 |
| RNPC3     | ENS000000185946 | KIAA1598 | ENS000000187164 | TNP02    | ENS000000105576 | SS18     | ENS000000141380 |          |                 |
| RNF113A   | ENS000000125352 | BIVM     | ENS000000134897 | ZNHIT2   | ENS000000174276 | HCFC1    | ENS000000172534 |          |                 |
| FAM122A   | ENS000000187866 | DNAJB4   | ENS000000162616 | KLF6     | ENS000000067082 | NUP99    | ENS000000110713 |          |                 |
| CAPN7     | ENS000000131375 | CCDC84   | ENS000000186166 | PRKDK1   | ENS000000160199 | POM121   | ENS000000196313 |          |                 |
| TIPIN     | ENS000000075131 | DCAF16   | ENS000000163257 | ENTPD5   | ENS000000187097 | TOMM34   | ENS000000025772 |          |                 |
| C14orf142 | ENS000000170270 | NUP160   | ENS000000030066 | KDM4A    | ENS000000066135 | CKAP5    | ENS000000175216 |          |                 |
| LNPEP     | ENS000000113441 | RFC2     | ENS000000049541 | STK17B   | ENS000000081320 | GRK6     | ENS000000198055 |          |                 |
| USP53     | ENS000000145390 | CDKN2AIP | ENS000000168564 | KLF6     | ENS000000067082 | SEPH51   | ENS000000086475 |          |                 |
| PANK2     | ENS000000125779 | UBE2T    | ENS000000071152 | KATNA1   | ENS000000186625 | QBCH1    | ENS000000198218 |          |                 |
| VPS72     | ENS000000163159 | DHFR     | ENS000000228716 | H2AFX    | ENS000000188486 | AH1      | ENS000000135541 |          |                 |
| DIS3      | ENS000000083520 | PTAR1    | ENS000000188647 | BRD8     | ENS000000112983 | CNOT10   | ENS000000182973 |          |                 |
|           |                 | RAD18    | ENS000000070950 | RCCD1    | ENS000000166965 | KLF9     | ENS000000119138 |          |                 |
|           |                 | DGT1     | ENS000000147162 | CDKN1B   | ENS00000011276  | SETD8    | ENS000000183955 |          |                 |
|           |                 | EZH2     | ENS000000106462 | UACA     | ENS000000137831 | ATF7IP   | ENS000000171681 |          |                 |
|           |                 | Csor42   | ENS000000197603 | KCTD9    | ENS000000104756 | RADS1C   | ENS000000108384 |          |                 |
|           |                 | LYRM7    | ENS000000186687 | ATL2     | ENS000000119787 | CDC42EP1 | ENS000000128283 |          |                 |
|           |                 | CCDC14   | ENS000000175455 | KPNA2    | ENS000000182481 | HP54     | ENS000000100099 |          |                 |
|           |                 | MAB1     | ENS000000138386 | HRS12    | ENS000000132541 | GOT1     | ENS000000120053 |          |                 |
|           |                 | SP1      | ENS000000185591 | VTA1     | ENS000000098444 | MTT1     | ENS000000204899 |          |                 |
|           |                 | RPA2     | ENS000000117748 | HMG8B    | ENS000000164104 | RRP1     | ENS000000160214 |          |                 |
|           |                 | RBBP8    | ENS000000101773 | C2orf69  | ENS000000178074 | AKIRIN2  | ENS000000153334 |          |                 |
|           |                 | RRM1     | ENS000000167325 | FADD     | ENS000000168040 | CDCC2    | ENS000000004897 |          |                 |
|           |                 | FAM178A  | ENS000000119906 | HIPK2    | ENS000000064393 | SMARCD1  | ENS000000066117 |          |                 |
|           |                 | SAP30BP  | ENS000000151526 | KIF22    | ENS000000079616 | BIRC2    | ENS000000110330 |          |                 |
|           |                 | NTSDC1   | ENS000000178425 | MGAT2    | ENS000000168282 |          |                 |          |                 |
|           |                 | CERS6    | ENS000000172292 | NR3C1    | ENS000000113580 |          |                 |          |                 |
|           |                 | ZBED5    | ENS000000262827 | DHX8     | ENS000000067596 |          |                 |          |                 |
|           |                 | MAP3K2   | ENS000000169967 | NMB      | ENS000000137966 |          |                 |          |                 |
|           |                 |          |                 | TFAP2A   | ENS000000137203 |          |                 |          |                 |
|           |                 |          |                 | HINT3    | ENS000000111911 |          |                 |          |                 |
|           |                 |          |                 | CDK16    | ENS000000130177 |          |                 |          |                 |
|           |                 |          |                 | NUMA1    | ENS000000137497 |          |                 |          |                 |
|           |                 |          |                 | ARRMC1   | ENS000000104442 |          |                 |          |                 |
|           |                 |          |                 | STAT1    | ENS000000115415 |          |                 |          |                 |
|           |                 |          |                 | CCDC107  | ENS000000159884 |          |                 |          |                 |
|           |                 |          |                 | TMPO     | ENS000000120802 |          |                 |          |                 |

1194  
1195  
1196  
1197

**Supplementary Table 1: Gene sets used to assess enrichment of cell cycle phases related transcripts in individual cells analyzed by scRNA-seq.**

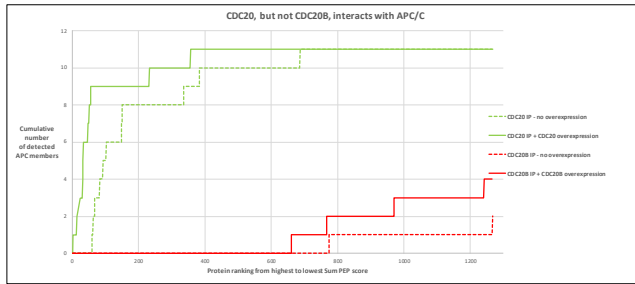

| IP CDC20 - no overexpression |                   |         |                 |                        |           |       |                  |          |        |                    |             |          |       |
|------------------------------|-------------------|---------|-----------------|------------------------|-----------|-------|------------------|----------|--------|--------------------|-------------|----------|-------|
| Protein FDR Confidence       | Accession         | Symbol  | Description     | Sum PEP Score/Coverage | #Peptides | #PSMs | #Unique Peptides | MW (kDa) | empAI  | Score/Sequenced HT | global rank | APC rank |       |
| High                         | ORU142            | CDC15   | Cell division c | 109.78                 | 27        | 48    | 27               | 68.79    | 6.80   | 88.85              | 60          | 1,00     |       |
| High                         | Q12834            | CDC20   | Cell division c | 104.51                 | 49.70     | 16    | 16               | 54.69    | 10.94  | 158.30             | 63          | 2,00     |       |
| High                         | ORU144            | ANAPC1  | Anaphase pro    | 103.93                 | 23.66     | 32    | 42               | 32       | 216.16 | 1.30               | 38.76       | 68       | 1,00  |
| High                         | ORU144            | ANAPC5  | Anaphase pro    | 91.89                  | 42.38     | 23    | 50               | 23       | 85.02  | 3.19               | 83.00       | 82       | 4,00  |
| High                         | ORU143,AAQ4248B13 | ANAPC7  | Anaphase pro    | 85.18                  | 45.58     | 21    | 38               | 21       | 66.61  | 6.13               | 63.05       | 92       | 5,00  |
| High                         | AAQ248DZ2,Q13042  | CDC16   | CDC16 cell div  | 79.32                  | 43.55     | 21    | 31               | 21       | 71.61  | 4.37               | 48.14       | 102      | 6,00  |
| High                         | P9260             | CDC27   | Cell division c | 63.63                  | 26.33     | 16    | 31               | 1        | 91.61  | 2.00               | 41.46       | 148      | 7,00  |
| High                         | GEF36             | CDC27   | Cell division c | 63.28                  | 26.25     | 16    | 31               | 1        | 91.68  | 2.00               | 41.49       | 150      | 8,00  |
| High                         | ORU16             | ANAPC2  | Anaphase pro    | 37.09                  | 22.75     | 13    | 15               | 13       | 93.77  | 0.93               | 15.24       | 336      | 9,00  |
| High                         | ORU145            | ANAPC4  | Anaphase pro    | 33.68                  | 16.34     | 13    | 13               | 13       | 92.06  | 0.81               | 7.07        | 383      | 10,00 |
| High                         | ORU113            | ANAPC10 | Anaphase pro    | 16.61                  | 31.89     | 5     | 9                | 5        | 21.24  | 1.85               | 11.95       | 686      | 11,00 |

| IP CDC20 + CDC20 overexpression |                   |         |                 |                        |           |       |                  |          |        |                    |             |          |    |
|---------------------------------|-------------------|---------|-----------------|------------------------|-----------|-------|------------------|----------|--------|--------------------|-------------|----------|----|
| Protein FDR Confidence          | Accession         | Symbol  | Description     | Sum PEP Score/Coverage | #Peptides | #PSMs | #Unique Peptides | MW (kDa) | empAI  | Score/Sequenced HT | global rank | APC rank |    |
| High                            | ORU144            | ANAPC1  | Anaphase pro    | 710.46                 | 59.57     | 81    | 319              | 81       | 216.36 | 28.94              | 640.59      | 2        | 1  |
| High                            | ORU144            | ANAPC5  | Anaphase pro    | 483.89                 | 65.73     | 50    | 288              | 46       | 85.02  | 142.07             | 635.28      | 13       | 2  |
| High                            | ORU145            | ANAPC4  | Anaphase pro    | 371.59                 | 59.53     | 43    | 198              | 43       | 92.06  | 34.74              | 384.67      | 24       | 3  |
| High                            | Q12834            | CDC20   | Cell division c | 332.93                 | 69.54     | 28    | 791              | 28       | 54.69  | 202.09             | 1712.61     | 28       | 3  |
| High                            | P9260             | CDC27   | Cell division c | 306.64                 | 60.66     | 34    | 215              | 1        | 91.61  | 20.92              | 435.97      | 31       | 4  |
| High                            | GEF36             | CDC27   | Cell division c | 306.44                 | 60.51     | 34    | 212              | 1        | 91.68  | 20.92              | 426.79      | 32       | 5  |
| High                            | ORU146            | ANAPC2  | Anaphase pro    | 301.10                 | 54.50     | 45    | 165              | 45       | 93.77  | 17.12              | 293.57      | 33       | 6  |
| High                            | AAQ248DZ2,Q13042  | CDC16   | CDC16 cell div  | 233.91                 | 55.00     | 29    | 108              | 29       | 71.61  | 22.90              | 226.42      | 47       | 7  |
| High                            | ORU142            | CDC15   | Cell division c | 244.48                 | 54.77     | 33    | 121              | 33       | 68.79  | 27.60              | 262.21      | 51       | 8  |
| High                            | ORU143,AAQ4248B13 | ANAPC7  | Anaphase pro    | 236.24                 | 64.61     | 32    | 117              | 32       | 66.61  | 37.75              | 239.65      | 56       | 9  |
| High                            | ORU113            | ANAPC10 | Anaphase pro    | 86.65                  | 76.22     | 11    | 43               | 11       | 21.24  | 37.48              | 96.76       | 252      | 10 |
| High                            | 1B386             | CDC27   | Cell division c | 63.60                  | 63.09     | 7     | 32               | 1        | 25.91  | 5.81               | 75.14       | 357      | 11 |

| IP CDC20B - no overexpression |                  |        |                |                        |           |       |                  |          |       |                    |             |          |   |
|-------------------------------|------------------|--------|----------------|------------------------|-----------|-------|------------------|----------|-------|--------------------|-------------|----------|---|
| Protein FDR Confidence        | Accession        | Symbol | Description    | Sum PEP Score/Coverage | #Peptides | #PSMs | #Unique Peptides | MW (kDa) | empAI | Score/Sequenced HT | global rank | APC rank |   |
| High                          | ORU145           | ANAPC4 | Anaphase pro   | 7.09                   | 3.47      | 1     | 2                | 1        | 92.06 | 0.05               | 0.13        | 774      | 1 |
| High                          | AAQ248DZ2,Q13042 | CDC16  | CDC16 cell div | 2.31                   | 4.68      | 1     | 1                | 1        | 71.61 | 0.06               | 0.00        | 1266     | 1 |

| IP CDC20B + CDC20B overexpression |                   |        |                 |                        |           |       |                  |          |       |                    |             |          |   |
|-----------------------------------|-------------------|--------|-----------------|------------------------|-----------|-------|------------------|----------|-------|--------------------|-------------|----------|---|
| Protein FDR Confidence            | Accession         | Symbol | Description     | Sum PEP Score/Coverage | #Peptides | #PSMs | #Unique Peptides | MW (kDa) | empAI | Score/Sequenced HT | global rank | APC rank |   |
| High                              | ORU143            | CDC20B | Cell division c | 215.12                 | 60.89     | 26    | 271              | 26       | 37.30 | 41.99              | 546.93      | 7        | 0 |
| High                              | ORU142            | CDC15  | Cell division c | 11.98                  | 12.90     | 5     | 5                | 5        | 68.79 | 0.17               | 0.00        | 661      | 1 |
| High                              | AAQ248DZ2,Q13042  | CDC16  | CDC16 cell div  | 9.77                   | 5.85      | 3     | 3                | 3        | 71.61 | 0.21               | 3.53        | 768      | 2 |
| High                              | P9260             | CDC27  | Cell division c | 6.89                   | 3.64      | 3     | 3                | 3        | 91.61 | 0.17               | 3.63        | 871      | 4 |
| High                              | ORU143,AAQ4248B13 | ANAPC7 | Anaphase pro    | 4.21                   | 6.18      | 2     | 2                | 2        | 66.61 | 0.15               | 0.00        | 1242     | 4 |

| Protein ranking from highest to lowest Sum PEP score | Cumulative number of detected APC members |                                 |                               |                                   |
|------------------------------------------------------|-------------------------------------------|---------------------------------|-------------------------------|-----------------------------------|
|                                                      | CDC20 IP - no overexpression              | CDC20 IP + CDC20 overexpression | CDC20B IP - no overexpression | CDC20B IP + CDC20B overexpression |
| 1                                                    | 0                                         | 0                               | 0                             | 0                                 |
| 2                                                    | 0                                         | 1                               | 0                             | 0                                 |
| 3                                                    | 0                                         | 1                               | 0                             | 0                                 |
| 4                                                    | 0                                         | 1                               | 0                             | 0                                 |
| 5                                                    | 0                                         | 1                               | 0                             | 0                                 |
| 6                                                    | 0                                         | 1                               | 0                             | 0                                 |
| 7                                                    | 0                                         | 1                               | 0                             | 0                                 |
| 8                                                    | 0                                         | 1                               | 0                             | 0                                 |
| 9                                                    | 0                                         | 1                               | 0                             | 0                                 |
| 10                                                   | 0                                         | 1                               | 0                             | 0                                 |
| 11                                                   | 0                                         | 1                               | 0                             | 0                                 |
| 12                                                   | 0                                         | 1                               | 0                             | 0                                 |
| 13                                                   | 0                                         | 2                               | 0                             | 0                                 |
| 14                                                   | 0                                         | 2                               | 0                             | 0                                 |
| 15                                                   | 0                                         | 2                               | 0                             | 0                                 |
| 16                                                   | 0                                         | 2                               | 0                             | 0                                 |
| 17                                                   | 0                                         | 2                               | 0                             | 0                                 |
| 18                                                   | 0                                         | 2                               | 0                             | 0                                 |
| 19                                                   | 0                                         | 2                               | 0                             | 0                                 |
| 20                                                   | 0                                         | 2                               | 0                             | 0                                 |
| 21                                                   | 0                                         | 2                               | 0                             | 0                                 |
| 22                                                   | 0                                         | 2                               | 0                             | 0                                 |
| 23                                                   | 0                                         | 2                               | 0                             | 0                                 |
| 24                                                   | 0                                         | 2                               | 0                             | 0                                 |
| 25                                                   | 0                                         | 2                               | 0                             | 0                                 |
| 26                                                   | 0                                         | 2                               | 0                             | 0                                 |
| 27                                                   | 0                                         | 2                               | 0                             | 0                                 |
| 28                                                   | 0                                         | 2                               | 0                             | 0                                 |
| 29                                                   | 0                                         | 2                               | 0                             | 0                                 |
| 30                                                   | 0                                         | 2                               | 0                             | 0                                 |
| 31                                                   | 0                                         | 3                               | 0                             | 0                                 |
| 32                                                   | 0                                         | 3                               | 0                             | 0                                 |
| 33                                                   | 0                                         | 3                               | 0                             | 0                                 |
| 34                                                   | 0                                         | 3                               | 0                             | 0                                 |
| 35                                                   | 0                                         | 3                               | 0                             | 0                                 |
| 36                                                   | 0                                         | 3                               | 0                             | 0                                 |
| 37                                                   | 0                                         | 3                               | 0                             | 0                                 |
| 38                                                   | 0                                         | 3                               | 0                             | 0                                 |
| 39                                                   | 0                                         | 3                               | 0                             | 0                                 |
| 40                                                   | 0                                         | 3                               | 0                             | 0                                 |
| 41                                                   | 0                                         | 3                               | 0                             | 0                                 |
| 42                                                   | 0                                         | 3                               | 0                             | 0                                 |
| 43                                                   | 0                                         | 3                               | 0                             | 0                                 |
| 44                                                   | 0                                         | 3                               | 0                             | 0                                 |
| 45                                                   | 0                                         | 3                               | 0                             | 0                                 |
| 46                                                   | 0                                         | 3                               | 0                             | 0                                 |
| 47                                                   | 0                                         | 3                               | 0                             | 0                                 |
| 48                                                   | 0                                         | 3                               | 0                             | 0                                 |
| 49                                                   | 0                                         | 3                               | 0                             | 0                                 |
| 50                                                   | 0                                         | 3                               | 0                             | 0                                 |
| 51                                                   | 0                                         | 3                               | 0                             | 0                                 |
| 52                                                   | 0                                         | 3                               | 0                             | 0                                 |
| 53                                                   | 0                                         | 3                               | 0                             | 0                                 |
| 54                                                   | 0                                         | 3                               | 0                             | 0                                 |
| 55                                                   | 0                                         | 3                               | 0                             | 0                                 |
| 56                                                   | 0                                         | 3                               | 0                             | 0                                 |
| 57                                                   | 0                                         | 3                               | 0                             | 0                                 |
| 58                                                   | 0                                         | 3                               | 0                             | 0                                 |
| 59                                                   | 0                                         | 3                               | 0                             | 0                                 |
| 60                                                   | 0                                         | 3                               | 0                             | 0                                 |
| 61                                                   | 0                                         | 3                               | 0                             | 0                                 |
| 62                                                   | 0                                         | 3                               | 0                             | 0                                 |
| 63                                                   | 0                                         | 3                               | 0                             | 0                                 |
| 64                                                   | 0                                         | 3                               | 0                             | 0                                 |
| 65                                                   | 0                                         | 3                               | 0                             | 0                                 |
| 66                                                   | 0                                         | 3                               | 0                             | 0                                 |
| 67                                                   | 0                                         | 3                               | 0                             | 0                                 |
| 68                                                   | 0                                         | 3                               | 0                             | 0                                 |
| 69                                                   | 0                                         | 3                               | 0                             | 0                                 |
| 70                                                   | 0                                         | 3                               | 0                             | 0                                 |
| 71                                                   | 0                                         | 3                               | 0                             | 0                                 |
| 72                                                   | 0                                         | 3                               | 0                             | 0                                 |
| 73                                                   | 0                                         | 3                               | 0                             | 0                                 |
| 74                                                   | 0                                         | 3                               | 0                             | 0                                 |
| 75                                                   | 0                                         | 3                               | 0                             | 0                                 |
| 76                                                   | 0                                         | 3                               | 0                             | 0                                 |
| 77                                                   | 0                                         | 3                               | 0                             | 0                                 |
| 78                                                   | 0                                         | 3                               | 0                             | 0                                 |
| 79                                                   | 0                                         | 3                               | 0                             | 0                                 |
| 80                                                   | 0                                         | 3                               | 0                             | 0                                 |
| 81                                                   | 0                                         | 3                               | 0                             | 0                                 |
| 82                                                   | 0                                         | 3                               | 0                             | 0                                 |
| 83                                                   | 0                                         | 3                               | 0                             | 0                                 |
| 84                                                   | 0                                         | 3                               | 0                             | 0                                 |
| 85                                                   | 0                                         | 3                               | 0                             | 0                                 |
| 86                                                   | 0                                         | 3                               | 0                             | 0                                 |
| 87                                                   | 0                                         | 3                               | 0                             | 0                                 |
| 88                                                   | 0                                         | 3                               | 0                             | 0                                 |
| 89                                                   | 0                                         | 3                               | 0                             | 0                                 |
| 90                                                   | 0                                         | 3                               | 0                             | 0                                 |
| 91                                                   | 0                                         | 3                               | 0                             | 0                                 |
| 92                                                   | 0                                         | 3                               | 0                             | 0                                 |
| 93                                                   | 0                                         | 3                               | 0                             | 0                                 |
| 94                                                   | 0                                         | 3                               | 0                             | 0                                 |
| 95                                                   | 0                                         | 3                               | 0                             | 0                                 |
| 96                                                   | 0                                         | 3                               | 0                             | 0                                 |
| 97                                                   | 0                                         | 3                               | 0                             | 0                                 |
| 98                                                   | 0                                         | 3                               | 0                             | 0                                 |
| 99                                                   | 0                                         | 3                               | 0                             | 0                                 |
| 100                                                  | 0                                         | 3                               | 0                             | 0                                 |
| 101                                                  | 0                                         | 3                               | 0                             | 0                                 |
| 102                                                  | 0                                         | 3                               | 0                             | 0                                 |
| 103                                                  | 0                                         | 3                               | 0                             | 0                                 |
| 104                                                  | 0                                         | 3                               | 0                             | 0                                 |
| 105                                                  | 0                                         | 3                               | 0                             | 0                                 |
| 106                                                  | 0                                         | 3                               | 0                             | 0                                 |
| 107                                                  | 0                                         | 3                               | 0                             | 0                                 |
| 108                                                  | 0                                         | 3                               | 0                             | 0                                 |
| 109                                                  | 0                                         | 3                               | 0                             | 0                                 |
| 110                                                  | 0                                         | 3                               | 0                             | 0                                 |
| 111                                                  | 0                                         | 3                               | 0                             | 0                                 |
| 112                                                  | 0                                         | 3                               | 0                             | 0                                 |
| 113                                                  | 0                                         | 3                               | 0                             | 0                                 |
| 114                                                  | 0                                         | 3                               | 0                             | 0                                 |
| 115                                                  | 0                                         | 3                               | 0                             | 0                                 |
| 116                                                  | 0                                         | 3                               | 0                             | 0                                 |
| 117                                                  | 0                                         | 3                               | 0                             | 0                                 |
| 118                                                  | 0                                         | 3                               | 0                             | 0                                 |
| 119                                                  | 0                                         | 3                               | 0                             | 0                                 |
| 120                                                  | 0                                         | 3                               | 0                             | 0                                 |
| 121                                                  | 0                                         | 3                               | 0                             | 0                                 |
| 122                                                  | 0                                         | 3                               | 0                             | 0                                 |
| 123                                                  | 0                                         | 3                               | 0                             | 0                                 |
| 124                                                  | 0                                         | 3                               | 0                             | 0                                 |
| 125                                                  | 0                                         | 3                               | 0                             | 0                                 |
| 126                                                  | 0                                         | 3                               | 0                             | 0                                 |
| 127                                                  | 0                                         | 3                               | 0                             | 0                                 |
| 128                                                  | 0                                         | 3                               | 0                             | 0                                 |
| 129                                                  | 0                                         | 3                               | 0                             | 0                                 |
| 130                                                  | 0                                         | 3                               | 0                             | 0                                 |
| 131                                                  | 0                                         | 3                               | 0                             | 0                                 |
| 132                                                  | 0                                         | 3                               | 0                             | 0                                 |
| 133                                                  | 0                                         | 3                               | 0                             | 0                                 |
| 134                                                  | 0                                         | 3                               | 0                             | 0                                 |
| 135                                                  | 0                                         | 3                               | 0                             | 0                                 |
| 136                                                  | 0                                         | 3                               | 0                             | 0                                 |
| 137                                                  | 0                                         | 3                               | 0                             | 0                                 |
| 138                                                  | 0                                         | 3                               | 0                             | 0                                 |
| 139                                                  | 0                                         | 3                               | 0                             | 0                                 |
| 140                                                  | 0                                         | 3                               | 0                             | 0                                 |
| 141                                                  | 0                                         | 3                               | 0                             | 0                                 |
| 142                                                  | 0                                         | 3                               | 0                             | 0                                 |
| 143                                                  | 0                                         | 3                               | 0                             | 0                                 |
| 144                                                  | 0                                         | 3                               | 0                             | 0                                 |
| 145                                                  | 0                                         | 3                               | 0                             | 0                                 |
| 146                                                  | 0                                         | 3                               | 0                             | 0                                 |
| 147                                                  | 0                                         | 3                               | 0                             | 0                                 |
| 148                                                  | 0                                         | 3                               | 0                             | 0                                 |
| 149                                                  | 0                                         | 3                               | 0                             | 0                                 |
| 150                                                  | 0                                         | 3                               | 0                             | 0                                 |
| 151                                                  | 0                                         | 3                               | 0                             | 0                                 |
| 152                                                  | 0                                         | 3                               | 0                             | 0                                 |
| 153                                                  | 0                                         | 3                               | 0                             | 0                                 |
| 154                                                  | 0                                         | 3                               | 0                             | 0                                 |
| 155                                                  | 0                                         | 3                               | 0                             | 0                                 |
| 156                                                  | 0                                         | 3                               | 0                             | 0                                 |
| 157                                                  | 0                                         | 3                               | 0                             | 0                                 |
| 158                                                  | 0                                         | 3                               | 0                             | 0                                 |
| 159                                                  | 0                                         | 3                               | 0                             | 0                                 |
| 160                                                  | 0                                         | 3                               | 0                             | 0                                 |
| 161                                                  | 0                                         | 3                               | 0                             | 0                                 |
| 162                                                  | 0                                         | 3                               | 0                             | 0                                 |
| 163                                                  | 0                                         | 3                               | 0                             | 0                                 |
| 164                                                  | 0                                         | 3                               | 0                             | 0                                 |
| 165                                                  | 0                                         | 3                               | 0                             | 0                                 |
| 166                                                  | 0                                         | 3                               | 0                             | 0                                 |
| 167                                                  | 0                                         | 3                               | 0                             | 0                                 |
| 168                                                  | 0                                         | 3                               | 0                             | 0                                 |
| 169                                                  | 0                                         | 3                               | 0                             | 0                                 |
| 170                                                  | 0                                         | 3                               | 0                             | 0                                 |
| 171                                                  | 0                                         | 3                               | 0                             | 0                                 |
| 172                                                  | 0                                         | 3                               | 0                             | 0                                 |
| 173                                                  | 0                                         | 3                               | 0                             | 0                                 |
| 174                                                  | 0                                         | 3                               | 0                             | 0                                 |
| 175                                                  | 0                                         | 3                               | 0                             | 0                                 |
| 176                                                  | 0                                         | 3                               | 0                             | 0                                 |
| 177                                                  | 0                                         | 3                               | 0                             | 0                                 |
| 178                                                  | 0                                         | 3                               | 0                             | 0                                 |
| 179                                                  | 0                                         | 3                               | 0                             | 0                                 |
| 180                                                  | 0                                         | 3                               | 0                             | 0                                 |
| 181                                                  | 0                                         | 3                               | 0                             | 0                                 |
| 182                                                  | 0                                         | 3                               | 0                             | 0                                 |
| 183                                                  | 0                                         | 3                               | 0                             | 0                                 |
| 184                                                  | 0                                         | 3                               | 0                             | 0                                 |
| 185                                                  | 0                                         | 3                               | 0                             | 0                                 |
| 186                                                  | 0                                         | 3                               | 0                             | 0                                 |
| 187                                                  | 0                                         | 3                               | 0                             |                                   |
